# Supplementary material for: Distribution and diversity of classical deacylases in bacteria
Source: PubMed Central journal article supplement (PMC11532494; doi:10.1038/s41467-024-53903-0), 2024-11-03
Supplement: 41467_2024_53903_MOESM1_ESM.pdf [file 41467_2024_53903_MOESM1_ESM.pdf]

## SUPPLEMENTARY INFORMATION

### Distribution and diversity of classical deacylases in bacteria

Leonie G. Graf<sup>1</sup>, Carlos Moreno-Yruela<sup>2,6</sup>, Chuan Qin<sup>1</sup>, Sabrina Schulze<sup>1</sup>, Gottfried J. Palm<sup>1</sup>, Ole Schmöker<sup>1</sup>, Nancy Wang<sup>3</sup>, Dianna M. Hocking<sup>3</sup>, Leila Jebeli<sup>3</sup>, Britta Girbardt<sup>1</sup>, Leona Berndt<sup>1</sup>, Babett Dörre<sup>1</sup>, Daniel M. Weis<sup>1</sup>, Markus Janetzky<sup>1</sup>, Dirk Albrecht<sup>4</sup>, Daniela Zühlke<sup>4</sup>, Susanne Sievers<sup>4</sup>, Richard A. Strugnelli<sup>3</sup>, Christian A. Olsen<sup>2</sup>, Kay Hofmann<sup>5</sup> and Michael Lammers<sup>1\*</sup>

<sup>1</sup>University of Greifswald, Institute of Biochemistry, Department Synthetic and Structural Biochemistry, 17489 Greifswald, Germany

<sup>2</sup>Center for Biopharmaceuticals & Department of Drug Design and Pharmacology, Faculty of Health and Medical Sciences, University of Copenhagen, Copenhagen 2100, Denmark

<sup>3</sup>The University of Melbourne, Department of Microbiology and Immunology, Peter Doherty Institute for Infection and Immunity, Melbourne, Victoria, 3000, Australia

<sup>4</sup>University of Greifswald, Institute of Microbiology, Department of Microbial Physiology and Molecular Biology, 17489 Greifswald, Germany

<sup>5</sup>University of Cologne, Institute for Genetics, 50674 Cologne, Germany

<sup>6</sup>Current address: Institute of Chemical Sciences and Engineering (ISIC), School of Basic Sciences (SB), EPFL, 1015 Lausanne, Switzerland

\*correspondence should be addressed to Michael Lammers; Email: michael.lammers@uni-greifswald.de; Tel.: 03834-420-4356; Fax: 03834-420-4373

Supplementary Figure 1-28

Supplementary Table 1-10

a

β1 →

1a\_Arabidopsis\_thaliana\_HDA14

```

1
1a_Arabidopsis_thaliana_HDA14 MSMALI.....VRP
1b_Klebsiella_pneumoniae_HdaH MKRKTG.....FFFDE
1c_Shinella_sp_DD12_DAC MTTCFLF.....ENP
1d_Neisseria_zoodegmatidis_DAC MNKIVRYM.....RLQLRRMLGRQ...A.RAAWISHP
1e_Stentor_coeruleus_HdaH MSKGINEI.EVDIHEICCLGRHSDLEEIL.....NSIDFYADIMLERDEEGFIPYH..LSLIYCRHKCVDLILSL
1f_S_cerevisiae_HOS3 MSSKHSDP.L.ER.....FYKQFQA...FVQNNPNVISAA..RAAAQIPE.....SAKAVVVLSP
1g_Homo_sapiens_HDAC4 MSSQSHPDGL.SG.....RDQPVELLNPARVNHPSTVDVATAL.....PLQVAP
2a_Homo_sapiens_HDAC2 MAYSQGGG.KK.....KVCYYYDG
2b_S_cerevisiae_HOS1 MSKLVIST.S.....IFQ
2c_Bacillus_subtilis_AcuC MRDSV.....FIYSP
2d_Chromatiales_bacterium_Acu MFVAK.....DE
3_Legionella_cherrii_ApaH MRHKYFF.....KE
4_Pseudomonas_sp_M30-35_ApaH MLTIYS.....D
5a_Acinetobacter_wuhouensis_H MLNVCF.....SP
5b_Vibrio_cholerae_HdaH MIPLIYHP.IY.....
5c_Moraxella_bovis_HDAC MFFKIAHC.HE.....
5d_Turneriella_parva_HdaH MSRKSAEL.....VYSP
5e_Nannocystis_exedens_AcuC MTTGEKIF.R.QL.....RRRANQMFAFLRP...P.PAAFYVGP
5f_Homo_sapiens_HDAC11 MLHTTQLY.Q.H.....VPE...T.RWPIVYSP
5g_Bacteriovorax_stolpii_AcuC MFFYHPDC.DLR.....

```

1a\_Arabidopsis\_thaliana\_HDA14

```

10 20
1a_Arabidopsis_thaliana_HDA14 ..F.....F...VPGSAGISGSRN.....
1b_Klebsiella_pneumoniae_HdaH ..R.....C...FWHSTG.LHAVTLPVGG
1c_Shinella_sp_DD12_DAC ..I.....F...LE.....
1d_Neisseria_zoodegmatidis_DAC ..L.....F...LHYGC.....
1e_Stentor_coeruleus_HdaH SIDFQVPYQGFMPHILAMACAGFPPEC...HEDL...I...Q
1f_S_cerevisiae_HOS3 ..Y.....S.....
1g_Homo_sapiens_HDAC4 ..S.....A...VPMDLRLDHQFSLPVAEPALREQQL.....QOELLALKKQKQQRQILIAEFQRQH
2a_Homo_sapiens_HDAC2 ..DI.....GNYYYGGG...HPMK...P
2b_S_cerevisiae_HOS1 ..S.....QVA..D.L...LPCN...N
2c_Bacillus_subtilis_AcuC ..SY.....QTYMFHQE...HPFN...Q
2d_Chromatiales_bacterium_Acu ..RI.....AAYGFGE...HPFG...L
3_Legionella_cherrii_ApaH ..K.....VSPES...HKEK...NQECLIQIPSA
4_Pseudomonas_sp_M30-35_ApaH ..D.....H...HLHHG...SCELID
5a_Acinetobacter_wuhouensis_H ..R.....YFAQT...HTNS...ME
5b_Vibrio_cholerae_HdaH ..F.....SQLDLPVG...HRYP...I
5c_Moraxella_bovis_HDAC ..F.....ALPLPDG...HRFP...M
5d_Turneriella_parva_HdaH ..IY.....DLS..DYT...HVIS...A
5e_Nannocystis_exedens_AcuC ..H.....Y...ECSW
5f_Homo_sapiens_HDAC11 ..R.....Y...NITFM
5g_Bacteriovorax_stolpii_AcuC ..FSEYGIE...IPIV...D

```

1a\_Arabidopsis\_thaliana\_HDA14

```

1a_Arabidopsis_thaliana_HDA14 .....
1b_Klebsiella_pneumoniae_HdaH .....
1c_Shinella_sp_DD12_DAC .....
1d_Neisseria_zoodegmatidis_DAC .....
1e_Stentor_coeruleus_HdaH .....TVNCL.LKHKQDVTSRDR
1f_S_cerevisiae_HOS3 .....
1g_Homo_sapiens_HDAC4 EQLSRQHEAQLHEHIKQQQEMLAMKHQQELLEHQKLERHRQEQELEKQHREQKLQQLKNKEKKGESAVASTEVKMKL
2a_Homo_sapiens_HDAC2 .....
2b_S_cerevisiae_HOS1 .....
2c_Bacillus_subtilis_AcuC .....
2d_Chromatiales_bacterium_Acu .....
3_Legionella_cherrii_ApaH .....
4_Pseudomonas_sp_M30-35_ApaH .....
5a_Acinetobacter_wuhouensis_H .....
5b_Vibrio_cholerae_HdaH .....
5c_Moraxella_bovis_HDAC .....
5d_Turneriella_parva_HdaH .....
5e_Nannocystis_exedens_AcuC .....
5f_Homo_sapiens_HDAC11 .....
5g_Bacteriovorax_stolpii_AcuC .....

```

1a\_Arabidopsis\_thaliana\_HDA14

```

30 40
1a_Arabidopsis_thaliana_HDA14 .....ICKKNQWRKYLKPSGSSINC.....SFS
1b_Klebsiella_pneumoniae_HdaH .....WVQ
1c_Shinella_sp_DD12_DAC .....
1d_Neisseria_zoodegmatidis_DAC .....
1e_Stentor_coeruleus_HdaH .....LGRT.....ALH.IVCAYGLADLIPILVQAGVKPELKD
1f_S_cerevisiae_HOS3 .....
1g_Homo_sapiens_HDAC4 QEFVLNKKKALAHNRNLNHCISSDPRYWGKTQHSSLDQSSPPQSGVSTSYNHPVLGMYDAKDDFPLRK.TASEPNLK
2a_Homo_sapiens_HDAC2 .....
2b_S_cerevisiae_HOS1 .....
2c_Bacillus_subtilis_AcuC .....
2d_Chromatiales_bacterium_Acu .....
3_Legionella_cherrii_ApaH .....
4_Pseudomonas_sp_M30-35_ApaH .....
5a_Acinetobacter_wuhouensis_H .....
5b_Vibrio_cholerae_HdaH .....
5c_Moraxella_bovis_HDAC .....
5d_Turneriella_parva_HdaH .....
5e_Nannocystis_exedens_AcuC .....
5f_Homo_sapiens_HDAC11 .....
5g_Bacteriovorax_stolpii_AcuC .....

```



1a\_Arabidopsis\_thaliana\_HDA14

1a\_Arabidopsis\_thaliana\_HDA14 .....  
1b\_Klebsiella\_pneumoniae\_HdaH .....  
1c\_Shinella\_sp\_DD12\_DAC .....  
1d\_Neisseria\_zoodegmatis\_DAC .....  
1e\_Stentor\_coeruleus\_HdaH FSGKMPIHYA IENYQAEFCFKQLLOEMG.....SDMFFCT  
1f\_S.\_cerevisiae\_HOS3 .....  
1g\_Homo\_sapiens\_HDAC4 .....LRS.....RLKQKVAERRSSPLLRKDGPPVVTALKKRPDLVTDTSACSSAPGSGFPSSPNSSG.SVS  
2a\_Homo\_sapiens\_HDAC2 .....  
2b\_S.\_cerevisiae\_HOS1 .....  
2c\_Bacillus\_subtilis\_AcuC .....  
2d\_Chromatiales\_bacterium\_Acu .....  
3\_Legionella\_cherrii\_ApaH .....  
4\_Pseudomonas\_sp\_M30-35\_ApaH .....  
5a\_Acinetobacter\_wuhouensis\_H .....  
5b\_Vibrio\_cholerae\_HdaH .....  
5c\_Moraxella\_bovis\_HDAC .....  
5d\_Turneriella\_parva\_HdaH .....  
5e\_Nannocystis\_exedens\_AcuC .....  
5f\_Homo\_sapiens\_HDAC11 .....  
5g\_Bacteriovorax\_stolpii\_AcuC .....

1a\_Arabidopsis\_thaliana\_HDA14

1a\_Arabidopsis\_thaliana\_HDA14 .....  
1b\_Klebsiella\_pneumoniae\_HdaH .....PPA.....  
1c\_Shinella\_sp\_DD12\_DAC .....  
1d\_Neisseria\_zoodegmatis\_DAC .....  
1e\_Stentor\_coeruleus\_HdaH DN.....  
1f\_S.\_cerevisiae\_HOS3 .....  
1g\_Homo\_sapiens\_HDAC4 AENGIAPAVPSIPAETS LAHRLVAREGSAAPLPLYTSPSLPNITLGLPATGPSAGTAGQQDAERLTLPALQQRSLFPP  
2a\_Homo\_sapiens\_HDAC2 .....  
2b\_S.\_cerevisiae\_HOS1 .....  
2c\_Bacillus\_subtilis\_AcuC .....  
2d\_Chromatiales\_bacterium\_Acu .....  
3\_Legionella\_cherrii\_ApaH .....  
4\_Pseudomonas\_sp\_M30-35\_ApaH .....  
5a\_Acinetobacter\_wuhouensis\_H .....  
5b\_Vibrio\_cholerae\_HdaH .....  
5c\_Moraxella\_bovis\_HDAC .....  
5d\_Turneriella\_parva\_HdaH .....  
5e\_Nannocystis\_exedens\_AcuC .....  
5f\_Homo\_sapiens\_HDAC11 .....  
5g\_Bacteriovorax\_stolpii\_AcuC .....

1a\_Arabidopsis\_thaliana\_HDA14

1a\_Arabidopsis\_thaliana\_HDA14 .....  
1b\_Klebsiella\_pneumoniae\_HdaH .....  
1c\_Shinella\_sp\_DD12\_DAC .....  
1d\_Neisseria\_zoodegmatis\_DAC .....  
1e\_Stentor\_coeruleus\_HdaH .....RGDKPIHTSVRAGSWEC.....  
1f\_S.\_cerevisiae\_HOS3 .....  
1g\_Homo\_sapiens\_HDAC4 GTHLTPYLSTSPLE RDGGAHSP LQH MV LLEQPPAQAPLVTGLGALPLH.....AQSLVGADRVSPSIHKLRQHR  
2a\_Homo\_sapiens\_HDAC2 .....  
2b\_S.\_cerevisiae\_HOS1 .....  
2c\_Bacillus\_subtilis\_AcuC .....  
2d\_Chromatiales\_bacterium\_Acu .....  
3\_Legionella\_cherrii\_ApaH .....  
4\_Pseudomonas\_sp\_M30-35\_ApaH .....  
5a\_Acinetobacter\_wuhouensis\_H .....  
5b\_Vibrio\_cholerae\_HdaH .....  
5c\_Moraxella\_bovis\_HDAC .....  
5d\_Turneriella\_parva\_HdaH .....  
5e\_Nannocystis\_exedens\_AcuC .....  
5f\_Homo\_sapiens\_HDAC11 .....  
5g\_Bacteriovorax\_stolpii\_AcuC .....

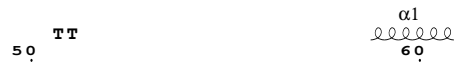

1a\_Arabidopsis\_thaliana\_HDA14

1a\_Arabidopsis\_thaliana\_HDA14 .....  
1b\_Klebsiella\_pneumoniae\_HdaH .....LIYSVSA.....  
1c\_Shinella\_sp\_DD12\_DAC .....  
1d\_Neisseria\_zoodegmatis\_DAC .....  
1e\_Stentor\_coeruleus\_HdaH .....  
1f\_S.\_cerevisiae\_HOS3 .....FNILITFGSEEML.....  
1g\_Homo\_sapiens\_HDAC4 PLGRTQSAPLPQNAQALQHLVLIQQHQHFLEKHKQFQQQQQMQMNIIPKPSAPARQFESHPEETEELREHQALLDE  
2a\_Homo\_sapiens\_HDAC2 .....  
2b\_S.\_cerevisiae\_HOS1 .....  
2c\_Bacillus\_subtilis\_AcuC .....  
2d\_Chromatiales\_bacterium\_Acu .....  
3\_Legionella\_cherrii\_ApaH .....  
4\_Pseudomonas\_sp\_M30-35\_ApaH .....  
5a\_Acinetobacter\_wuhouensis\_H .....  
5b\_Vibrio\_cholerae\_HdaH .....  
5c\_Moraxella\_bovis\_HDAC .....  
5d\_Turneriella\_parva\_HdaH .....  
5e\_Nannocystis\_exedens\_AcuC .....  
5f\_Homo\_sapiens\_HDAC11 .....  
5g\_Bacteriovorax\_stolpii\_AcuC .....

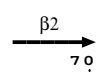

1a\_Arabidopsis\_thaliana\_HDA14

1a\_Arabidopsis\_thaliana\_HDA14  
 1b\_Klebsiella\_pneumoniae\_HdaH  
 1c\_Shinella\_sp\_DD12\_DAC  
 1d\_Neisseria\_zoodegmatis\_DAC  
 1e\_Stentor\_coeruleus\_HdaH  
 1f\_S\_cerevisiae\_HOS3  
 1g\_Homo\_sapiens\_HDAC4  
 2a\_Homo\_sapiens\_HDAC2  
 2b\_S\_cerevisiae\_HOS1  
 2c\_Bacillus\_subtilis\_AcuC  
 2d\_Chromatiales\_bacterium\_Acu  
 3\_Legionella\_cherrii\_ApaH  
 4\_Pseudomonas\_sp\_M30-35\_ApaH  
 5a\_Acinetobacter\_wuhouensis\_H  
 5b\_Vibrio\_cholerae\_HdaH  
 5c\_Moraxella\_bovis\_HDAC  
 5d\_Turneriella\_parva\_HdaH  
 5e\_Nannocystis\_exedens\_AcuC  
 5f\_Homo\_sapiens\_HDAC11  
 5g\_Bacteriovorax\_stolpii\_AcuC

1a\_Arabidopsis\_thaliana\_HDA14

T . T 00000  
 80 90

1a\_Arabidopsis\_thaliana\_HDA14  
 1b\_Klebsiella\_pneumoniae\_HdaH  
 1c\_Shinella\_sp\_DD12\_DAC  
 1d\_Neisseria\_zoodegmatis\_DAC  
 1e\_Stentor\_coeruleus\_HdaH  
 1f\_S\_cerevisiae\_HOS3  
 1g\_Homo\_sapiens\_HDAC4  
 2a\_Homo\_sapiens\_HDAC2  
 2b\_S\_cerevisiae\_HOS1  
 2c\_Bacillus\_subtilis\_AcuC  
 2d\_Chromatiales\_bacterium\_Acu  
 3\_Legionella\_cherrii\_ApaH  
 4\_Pseudomonas\_sp\_M30-35\_ApaH  
 5a\_Acinetobacter\_wuhouensis\_H  
 5b\_Vibrio\_cholerae\_HdaH  
 5c\_Moraxella\_bovis\_HDAC  
 5d\_Turneriella\_parva\_HdaH  
 5e\_Nannocystis\_exedens\_AcuC  
 5f\_Homo\_sapiens\_HDAC11  
 5g\_Bacteriovorax\_stolpii\_AcuC

1a\_Arabidopsis\_thaliana\_HDA14

α2 000000

1a\_Arabidopsis\_thaliana\_HDA14  
 1b\_Klebsiella\_pneumoniae\_HdaH  
 1c\_Shinella\_sp\_DD12\_DAC  
 1d\_Neisseria\_zoodegmatis\_DAC  
 1e\_Stentor\_coeruleus\_HdaH  
 1f\_S\_cerevisiae\_HOS3  
 1g\_Homo\_sapiens\_HDAC4  
 2a\_Homo\_sapiens\_HDAC2  
 2b\_S\_cerevisiae\_HOS1  
 2c\_Bacillus\_subtilis\_AcuC  
 2d\_Chromatiales\_bacterium\_Acu  
 3\_Legionella\_cherrii\_ApaH  
 4\_Pseudomonas\_sp\_M30-35\_ApaH  
 5a\_Acinetobacter\_wuhouensis\_H  
 5b\_Vibrio\_cholerae\_HdaH  
 5c\_Moraxella\_bovis\_HDAC  
 5d\_Turneriella\_parva\_HdaH  
 5e\_Nannocystis\_exedens\_AcuC  
 5f\_Homo\_sapiens\_HDAC11  
 5g\_Bacteriovorax\_stolpii\_AcuC

1a\_Arabidopsis\_thaliana\_HDA14

α3 η1 β3 α4  
 100 110 120

1a\_Arabidopsis\_thaliana\_HDA14  
 1b\_Klebsiella\_pneumoniae\_HdaH  
 1c\_Shinella\_sp\_DD12\_DAC  
 1d\_Neisseria\_zoodegmatis\_DAC  
 1e\_Stentor\_coeruleus\_HdaH  
 1f\_S\_cerevisiae\_HOS3  
 1g\_Homo\_sapiens\_HDAC4  
 2a\_Homo\_sapiens\_HDAC2  
 2b\_S\_cerevisiae\_HOS1  
 2c\_Bacillus\_subtilis\_AcuC  
 2d\_Chromatiales\_bacterium\_Acu  
 3\_Legionella\_cherrii\_ApaH  
 4\_Pseudomonas\_sp\_M30-35\_ApaH  
 5a\_Acinetobacter\_wuhouensis\_H  
 5b\_Vibrio\_cholerae\_HdaH  
 5c\_Moraxella\_bovis\_HDAC  
 5d\_Turneriella\_parva\_HdaH  
 5e\_Nannocystis\_exedens\_AcuC  
 5f\_Homo\_sapiens\_HDAC11  
 5g\_Bacteriovorax\_stolpii\_AcuC

1a\_Arabidopsis\_thaliana\_HDA14 00000000.00.....00.00.....0 η2

130 140

1a\_Arabidopsis\_thaliana\_HDA14 VHDKAYVFGLE.KA.....MD.EA.....S  
 1b\_Klebsiella\_pneumoniae\_HdaH IHPDSYLERFK.AI.....SD.NG.....G  
 1c\_Shinella\_sp\_DD12\_DAC AHPERHLLTAVM.SA.....MP.E.....E  
 1d\_Neisseria\_zoodegmatis\_DAC IHPRKYLRFLE.SV.....QP.QP.....G  
 1e\_Stentor\_coeruleus\_HdaH VHEYSYILGLK.KA.....INKIP.....E  
 1f\_S\_cerevisiae\_HOS3 VHGSSWPAELI.EL.....CQ.MADAKLLKG.....  
 1g\_Homo\_sapiens\_HDAC4 VHESEHTLLYGTNPLNRQKLD SKKLLGSLASVFRLP.C.....G  
 2a\_Homo\_sapiens\_HDAC2 YHSDEYIKFLR.SI.....RP.D.....NM  
 2b\_S\_cerevisiae\_HOS1 FHSKSYIDYLI.NG.....RF.NK.....MM.AQDVNNP MVESKWSLSELADNWNKIDY  
 2c\_Bacillus\_subtilis\_AcuC VHTDDYIQAVK.LA.....GA.G.....KL  
 2d\_Chromatiales\_bacterium\_Acu FHTPRYLDFVA.DT.....CS.GE.....GM  
 3\_Legionella\_cherrii\_ApaH VHTSEYLQII.RD.....CI.QA.....Q  
 4\_Pseudomonas\_sp\_M30-35\_ApaH IHTAEYLNFFE.GA.....WA.RW.....QEODGTG DLLPYTWPARTLSQ  
 5a\_Acinetobacter\_wuhouensis\_H LHSPKYVEAFM.TG.....QP.NK.....  
 5b\_Vibrio\_cholerae\_HdaH LHPDPYVQALL.EG.....RL.PA.....A  
 5c\_Moraxella\_bovis\_HDAC THTADYWHALD.NL.....TL.SP.....K  
 5d\_Turneriella\_parva\_HdaH VHTERYLKDFL.GA.....RL.TE.....Q.TQR  
 5e\_Nannocystis\_exedens\_AcuC VEDDAYLDACQ.RP.E.....V.M.....  
 5f\_Homo\_sapiens\_HDAC11 VHTRRYLNLK.WS.F.....A.VA.....T  
 5g\_Bacteriovorax\_stolpii\_AcuC VHNKDEIHRLL.GT.....AG.ER.....Q

1a\_Arabidopsis\_thaliana\_HDA14 .....0 β4 → TT TT → β5

150

1a\_Arabidopsis\_thaliana\_HDA14 .....DS.....GLI..FIEGSGPTYAT.....  
 1b\_Klebsiella\_pneumoniae\_HdaH .....G...ML..GKEAPLG.....  
 1c\_Shinella\_sp\_DD12\_DAC .....DIA..QV..EADTYAS.....  
 1d\_Neisseria\_zoodegmatis\_DAC .....K.IY..RI..DDTVMG.....  
 1e\_Stentor\_coeruleus\_HdaH .....L...S.FPQ.KY..DITLIT.....  
 1f\_S\_cerevisiae\_HOS3 .....EI.....EVPDTWN..SGDIYLS.....  
 1g\_Homo\_sapiens\_HDAC4 .....CV..GV..DSDTIWNE.....  
 2a\_Homo\_sapiens\_HDAC2 .....SEYSKQ.....MQRFN..V..GEDCPVF.....  
 2b\_S\_cerevisiae\_HOS1 NPSQDLQRFRTTRENLYNYLNSQALENNMD.C.INNSEVPTNDKPTDYILNSETKQY.NL.EGDCPIF.....  
 2c\_Bacillus\_subtilis\_AcuC .....P.AEE.....GESY.G.LD.GGDTPAF.....  
 2d\_Chromatiales\_bacterium\_Acu .....A.....KGWK..QL..NSDILIT.....  
 3\_Legionella\_cherrii\_ApaH .....RL.....PTSLHGQL.....GYY..SF..DAGAPIT.....  
 4\_Pseudomonas\_sp\_M30-35\_ApaH .....K.....M.....R.RIGFPWS.....  
 5a\_Acinetobacter\_wuhouensis\_H .....D.....C.....R..KIGLPMS.....  
 5b\_Vibrio\_cholerae\_HdaH .....K.....M.....R..RIGFPWS.....  
 5c\_Moraxella\_bovis\_HDAC .....D.....C.....R..KIGLPMS.....  
 5d\_Turneriella\_parva\_HdaH .....S.....DILG.GL.AVSE.VDT.....  
 5e\_Nannocystis\_exedens\_AcuC .....IT.....ERG.WAINVGGGF.HHCS.....SDRGGFCVA  
 5f\_Homo\_sapiens\_HDAC11 .....GE..I.....Y.....Q..CYELVNDQGGKFER  
 5g\_Bacteriovorax\_stolpii\_AcuC

1a\_Arabidopsis\_thaliana\_HDA14 .....α6 β6 TT TT TT

160 170 180 190 200 210

1a\_Arabidopsis\_thaliana\_HDA14 .....STTFQDSLIAAGAGMALVDSVIAASRNSVDPPIG.FAL.IRPPGHHAV.....PKGPMGFCV  
 1b\_Klebsiella\_pneumoniae\_HdaH .....PGSYEIACLSAGLACA AAVEAVLKGE.....LDNA.YSL.SRPPGHHACL.....PDQSMGFCF  
 1c\_Shinella\_sp\_DD12\_DAC .....PATLQAALGTGGATAAVDAVFTGK.....ADNA.FVA.ARPPGHHAE.....RDKAMGFCF  
 1d\_Neisseria\_zoodegmatis\_DAC .....SGALEAARYAAGAVAAVDMVMKGE.....AFHA.FCA.IRPPGHHAK.....SDQAGGFCFL  
 1e\_Stentor\_coeruleus\_HdaH .....KESYNAAALIAANCVIEAIDEVVOGK.....FKNA.FCVI.RPPGHHVGGPFGAVTA EEDPNSKSTGFCFL  
 1f\_S\_cerevisiae\_HOS3 .....SKTIKALQGTIGAIETGVDSIFKGPSAEHISNRA.FVA.IRPPGHHCH.....YGTSPGFCFL  
 1g\_Homo\_sapiens\_HDAC4 .....VHSAGAARLAVGCVVLELVFKVATGE.....LKNQ.FAV.VRPPGHHAE.....ESTPMGFCY  
 2a\_Homo\_sapiens\_HDAC2 .....DGLFEPFCQLSTGGSVAGAVKLN.R.....QQT.D.MAVNWAGGLHHAK.....KSEASGFCY  
 2b\_S\_cerevisiae\_HOS1 .....SYLPMYCCQVITGATLNLLDHLSP.....TERL.IGINWDGGRHHAF.....KQRASGFCY  
 2c\_Bacillus\_subtilis\_AcuC .....AGMHEAASLLVGGTLTAADWVMS.....GQAL.HAANLGGGLHHGF.....RGRASGFCI  
 2d\_Chromatiales\_bacterium\_Acu .....PGLYEASADIA GTTLALVDLVMG.....GRAR.RAF.TPIGGLHHAG.....RDHAA GFCV  
 3\_Legionella\_cherrii\_ApaH .....PGTFEVLK.....DISMTLF.....HSKK.VHFSFGLPTHHAF.....ADEGSGFCI  
 4\_Pseudomonas\_sp\_M30-35\_ApaH .....AGTWAAVYSAAQVALTAQHEITNGA.....HSA.FAL.CRPPGHHAR.....SDVMSGFCY  
 5a\_Acinetobacter\_wuhouensis\_H .....EQLRDVLA INAGQALMATELAF.E.....H..G.IAANTAQGFHHAR.....PEYGGFCY  
 5b\_Vibrio\_cholerae\_HdaH .....KTLIERTLHSGVGTCLTVEQA.....LQSG.VAIHLSGGYHHAH.....ADFGSGFCFL  
 5c\_Moraxella\_bovis\_HDAC .....KELIDRERLVV GATIECAKFA.....LNDG.ISLSTSGGTHHAF.....ADSGEGFCI  
 5d\_Turneriella\_parva\_HdaH .....ERIVNAVCTAAGGTTLAAELAL.....KHG.VASNLSGGFHHAF.....ADHAE GFCF  
 5e\_Nannocystis\_exedens\_AcuC .....ARILDQRAMTGGTLMATDIAL.....GTGKIAINLGGGFHHCH.....RQIGRGFCVA  
 5f\_Homo\_sapiens\_HDAC11 .....RKVLRPLRTQTGGTIMAGKLV.....ERG.WAINVGGGFHHCS.....SDRGGFCVA  
 5g\_Bacteriovorax\_stolpii\_AcuC YNPKNQKRDWKELVETILMQVAMTYNSTKYA.....LKNQ.FSYHLGGGMHHS.....SFAGRGFCFL

1a\_Arabidopsis\_thaliana\_HDA14 .....α7 β7 α8

220 230 240 250

1a\_Arabidopsis\_thaliana\_HDA14 FGNVAIAARHAQR.T..HGLKRIFIIDVHHGNGTNDAFTE.D  
 1b\_Klebsiella\_pneumoniae\_HdaH LANIPIAVERAKA.Q..LGLGKVAIIDVDVHHGNGTQHIYLO.R  
 1c\_Shinella\_sp\_DD12\_DAC FNNAAIAARHAQK.A..HGAERVAIVDWDVHHGNGTQDIFED.D  
 1d\_Neisseria\_zoodegmatis\_DAC VNNVAVGVMAHIA.R..FRLERIAVVDVHHGNGTAEIFKD.D  
 1e\_Stentor\_coeruleus\_HdaH FNNIAIGAGYAKY.KYSKVIKVAIIDVHHGNGTEAMVRN..LIPNQVTHEITG  
 1f\_S\_cerevisiae\_HOS3 LNNHVAIEIYAYD.T..YNVTHVLDVLDLHHGNGTQDICWKRA GFKPEEPEPSSYDDFGKKFAEF.D  
 1g\_Homo\_sapiens\_HDAC4 FNSVAVAAKLLQQR..LSVSKILLVLDVHHGNGTQQA FYS.D  
 2a\_Homo\_sapiens\_HDAC2 VNDIVLAILLELLK...YHQRVLYIDIDHHGNGVEEAFYT..T  
 2b\_S\_cerevisiae\_HOS1 INDVLLIQRLRK.A..KLNKITVVDVLDLHHGNGVEKAFOY..S  
 2c\_Bacillus\_subtilis\_AcuC YNDSAVAIQYIQK.K..YSARVLYIDDAHHGNGVQFTFYD..N  
 2d\_Chromatiales\_bacterium\_Acu FNDICVIAAEILRS.K..YGLKRITAYVDIDAHGNGMYAFES..R  
 3\_Legionella\_cherrii\_ApaH LNKSAVLLKHMQR.N..TKPLKHIIVGTDVNRDNGLCDILMN..S  
 4\_Pseudomonas\_sp\_M30-35\_ApaH LNNAAIAAQAFID.Q..GHKRVAILVDVHHGNGTQSIFY.S..Y  
 5a\_Acinetobacter\_wuhouensis\_H FNLALIAAQ...YPNKRIFILDCCDQGGTAEFTRK..R  
 5b\_Vibrio\_cholerae\_HdaH FNDLIAIAHFALS.L..PSVDKVIDSDVHHGNGTATLCAE..R  
 5c\_Moraxella\_bovis\_HDAC LNDICVASNVLLN.Q..GLAKRILLDLVDVHHGNGNASIMAD..N  
 5d\_Turneriella\_parva\_HdaH VNDTVLAI RALRK.T..RPGLKVAVIDLDVHHGNGTAKLLQD..D  
 5e\_Nannocystis\_exedens\_AcuC FHDVAIAIEAQR.L..GFHERILVVDLQHDGNGTRALFAD..D  
 5f\_Homo\_sapiens\_HDAC11 YADITLAIKFLFERV..EGISRATIIDLDAGHNGHERDFMD..D  
 5g\_Bacteriovorax\_stolpii\_AcuC VNDIVITLRKLQN.E..GAIKTAIVVDVHHGNGAPEILQN..D



1a\_Arabidopsis\_thaliana\_HDA14

390

1a\_Arabidopsis\_thaliana\_HDA14
1b\_Klebsiella\_pneumoniae\_HdaH
1c\_Shinella\_sp\_DD12\_DAC
1d\_Neisseria\_zoodegmatis\_DAC
1e\_Stentor\_coeruleus\_HdaH
1f\_S\_cerevisiae\_HOS3
1g\_Homo\_sapiens\_HDAC4
2a\_Homo\_sapiens\_HDAC2
2b\_S\_cerevisiae\_HOS1
2c\_Bacillus\_subtilis\_AcuC
2d\_Chromatiales\_bacterium\_Acu
3\_Legionella\_cherrii\_ApaH
4\_Pseudomonas\_sp\_M30-35\_ApaH
5a\_Acinetobacter\_wuhouensis\_H
5b\_Vibrio\_cholerae\_HdaH
5c\_Moraxella\_bovis\_HDAC
5d\_Turneriella\_parva\_HdaH
5e\_Nannocystis\_exedens\_AcuC
5f\_Homo\_sapiens\_HDAC11
5g\_Bacteriovorax\_stolpii\_AcuC

1a\_Arabidopsis\_thaliana\_HDA14

η4 η5
0.000000 0.000000

1a\_Arabidopsis\_thaliana\_HDA14
1b\_Klebsiella\_pneumoniae\_HdaH
1c\_Shinella\_sp\_DD12\_DAC
1d\_Neisseria\_zoodegmatis\_DAC
1e\_Stentor\_coeruleus\_HdaH
1f\_S\_cerevisiae\_HOS3
1g\_Homo\_sapiens\_HDAC4
2a\_Homo\_sapiens\_HDAC2
2b\_S\_cerevisiae\_HOS1
2c\_Bacillus\_subtilis\_AcuC
2d\_Chromatiales\_bacterium\_Acu
3\_Legionella\_cherrii\_ApaH
4\_Pseudomonas\_sp\_M30-35\_ApaH
5a\_Acinetobacter\_wuhouensis\_H
5b\_Vibrio\_cholerae\_HdaH
5c\_Moraxella\_bovis\_HDAC
5d\_Turneriella\_parva\_HdaH
5e\_Nannocystis\_exedens\_AcuC
5f\_Homo\_sapiens\_HDAC11
5g\_Bacteriovorax\_stolpii\_AcuC

1a\_Arabidopsis\_thaliana\_HDA14

0.000000 0.000000
400 410

1a\_Arabidopsis\_thaliana\_HDA14
1b\_Klebsiella\_pneumoniae\_HdaH
1c\_Shinella\_sp\_DD12\_DAC
1d\_Neisseria\_zoodegmatis\_DAC
1e\_Stentor\_coeruleus\_HdaH
1f\_S\_cerevisiae\_HOS3
1g\_Homo\_sapiens\_HDAC4
2a\_Homo\_sapiens\_HDAC2
2b\_S\_cerevisiae\_HOS1
2c\_Bacillus\_subtilis\_AcuC
2d\_Chromatiales\_bacterium\_Acu
3\_Legionella\_cherrii\_ApaH
4\_Pseudomonas\_sp\_M30-35\_ApaH
5a\_Acinetobacter\_wuhouensis\_H
5b\_Vibrio\_cholerae\_HdaH
5c\_Moraxella\_bovis\_HDAC
5d\_Turneriella\_parva\_HdaH
5e\_Nannocystis\_exedens\_AcuC
5f\_Homo\_sapiens\_HDAC11
5g\_Bacteriovorax\_stolpii\_AcuC

1a\_Arabidopsis\_thaliana\_HDA14

α13
0.000000 0.000000

1a\_Arabidopsis\_thaliana\_HDA14
1b\_Klebsiella\_pneumoniae\_HdaH
1c\_Shinella\_sp\_DD12\_DAC
1d\_Neisseria\_zoodegmatis\_DAC
1e\_Stentor\_coeruleus\_HdaH
1f\_S\_cerevisiae\_HOS3
1g\_Homo\_sapiens\_HDAC4
2a\_Homo\_sapiens\_HDAC2
2b\_S\_cerevisiae\_HOS1
2c\_Bacillus\_subtilis\_AcuC
2d\_Chromatiales\_bacterium\_Acu
3\_Legionella\_cherrii\_ApaH
4\_Pseudomonas\_sp\_M30-35\_ApaH
5a\_Acinetobacter\_wuhouensis\_H
5b\_Vibrio\_cholerae\_HdaH
5c\_Moraxella\_bovis\_HDAC
5d\_Turneriella\_parva\_HdaH
5e\_Nannocystis\_exedens\_AcuC
5f\_Homo\_sapiens\_HDAC11
5g\_Bacteriovorax\_stolpii\_AcuC

1a\_Arabidopsis\_thaliana\_HDA14 ..Q.....Q  
42Q  
1a\_Arabidopsis\_thaliana\_HDA14 ..I.....H.....C.....  
1b\_Klebsiella\_pneumoniae\_HdaH ..RLAQQFG.....LL.....  
1c\_Shinella\_sp\_DD12\_DAC .....  
1d\_Neisseria\_zoodegmatis\_DAC ..IYDKFLK.....SEH.....  
1e\_Stentor\_coeruleus\_HdaH GEEGEEREDNEEDDEE.....ESEEDSQUESKTKDKANN.....GE.....PED..N...  
1f\_S\_cerevisiae\_HOS3 ISRHLETLE..IEKKGDESDHELKEKNWK.....NSHQRRLLQGNGMYKIPSNTKPHRIRQPQNANTPTYDDSDIS  
1g\_Homo\_sapiens\_HDAC4 ..IHSKYWR.....CLQRTT.STAGR.....SLIEAQTC.....ENEAE  
2a\_Homo\_sapiens\_HDAC2 HKKGAKKARIEEDKKETEDKKTDVKEEDK.....SKDNS.....GE.....KTD..T...  
2b\_S\_cerevisiae\_HOS1 ..ENYQYWI.....YEME.....GS.....SRMKML.....  
2c\_Bacillus\_subtilis\_AcuC PSSWSDPADLYPP...IPRKPEITEKNAQTVSKALYAIR.....SE.....Q...  
2d\_Chromatiales\_bacterium\_Acu .....  
3\_Legionella\_cherrii\_ApaH .....HQM.....GK.....  
4\_Pseudomonas\_sp\_M30-35\_ApaH .....  
5a\_Acinetobacter\_wuhouensis\_H .....GY.....  
5b\_Vibrio\_cholerae\_HdaH .....  
5c\_Moraxella\_bovis\_HDAC .....  
5d\_Turneriella\_parva\_HdaH .....  
5e\_Nannocystis\_exedens\_AcuC FPI SDE.LK.....AEL.....D...  
5f\_Homo\_sapiens\_HDAC11 .....  
5g\_Bacteriovorax\_stolpii\_AcuC .....

1a\_Arabidopsis\_thaliana\_HDA14

1a\_Arabidopsis\_thaliana\_HDA14 .....L  
1b\_Klebsiella\_pneumoniae\_HdaH .....  
1c\_Shinella\_sp\_DD12\_DAC .....  
1d\_Neisseria\_zoodegmatis\_DAC .....A  
1e\_Stentor\_coeruleus\_HdaH .....  
1f\_S\_cerevisiae\_HOS3 MISHVSRKHTRSGG.RW.....  
1g\_Homo\_sapiens\_HDAC4 TVTAMASL...SVG.VKPAEKRPE.EPMEEPP.L  
2a\_Homo\_sapiens\_HDAC2 .....KGT...KSEQLSN..P  
2b\_S\_cerevisiae\_HOS1 .....RNDNKDRDMVELMKFYEL..  
2c\_Bacillus\_subtilis\_AcuC .....QR.....T..K  
2d\_Chromatiales\_bacterium\_Acu .....  
3\_Legionella\_cherrii\_ApaH .....TSSP..  
4\_Pseudomonas\_sp\_M30-35\_ApaH .....  
5a\_Acinetobacter\_wuhouensis\_H .....E..  
5b\_Vibrio\_cholerae\_HdaH .....  
5c\_Moraxella\_bovis\_HDAC .....  
5d\_Turneriella\_parva\_HdaH .....IKIMH...GRQ  
5e\_Nannocystis\_exedens\_AcuC .....PENYLRAIDEAADE.YRFQLSSP.R  
5f\_Homo\_sapiens\_HDAC11 .....AVP..  
5g\_Bacteriovorax\_stolpii\_AcuC .....



**b****Subcluster 1a**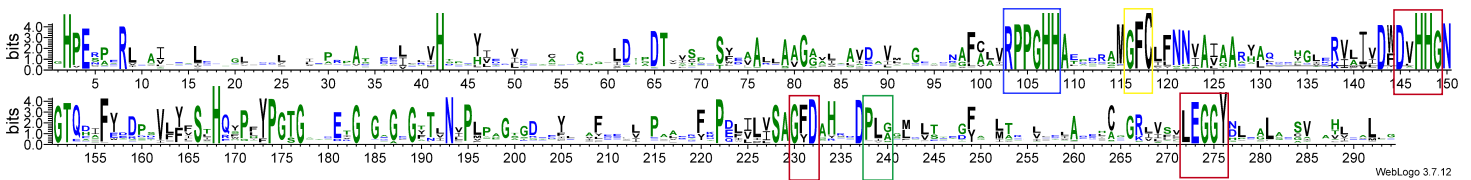**Subcluster 1b**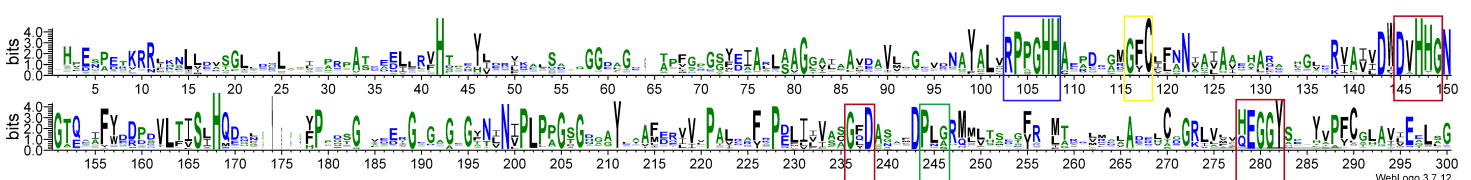**Subcluster 1c**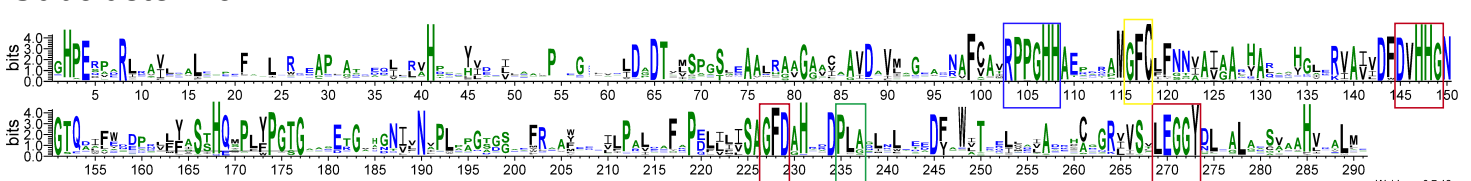**Subcluster 1d**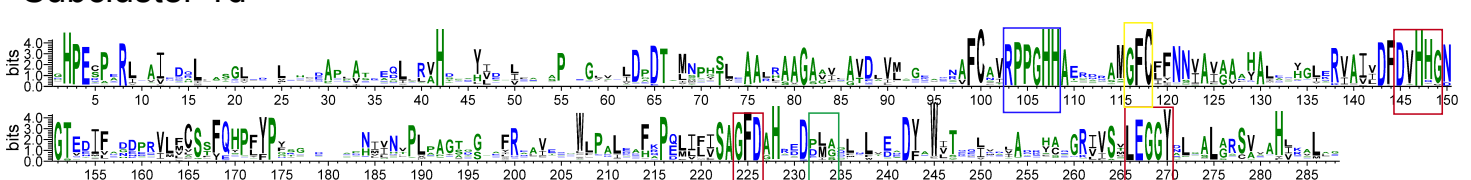**Subcluster 1e**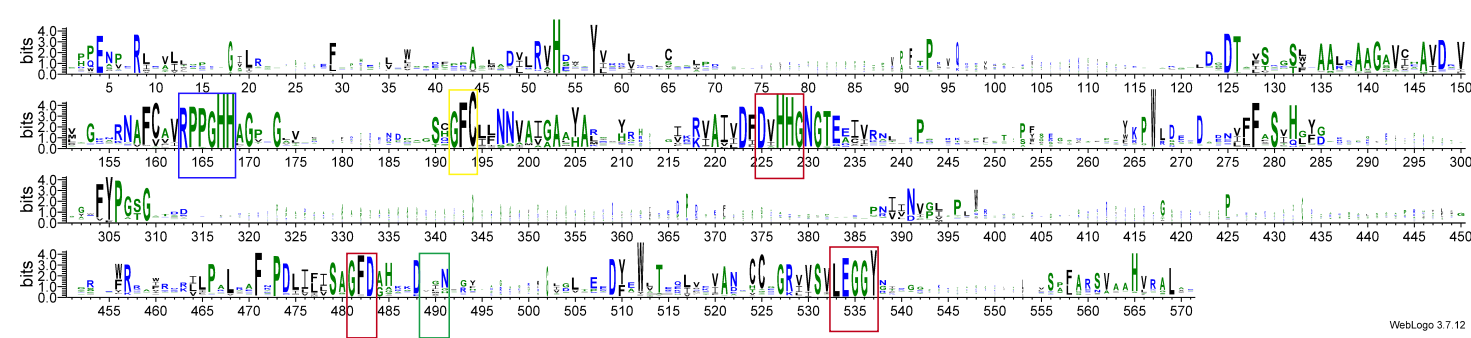**Subcluster 1f**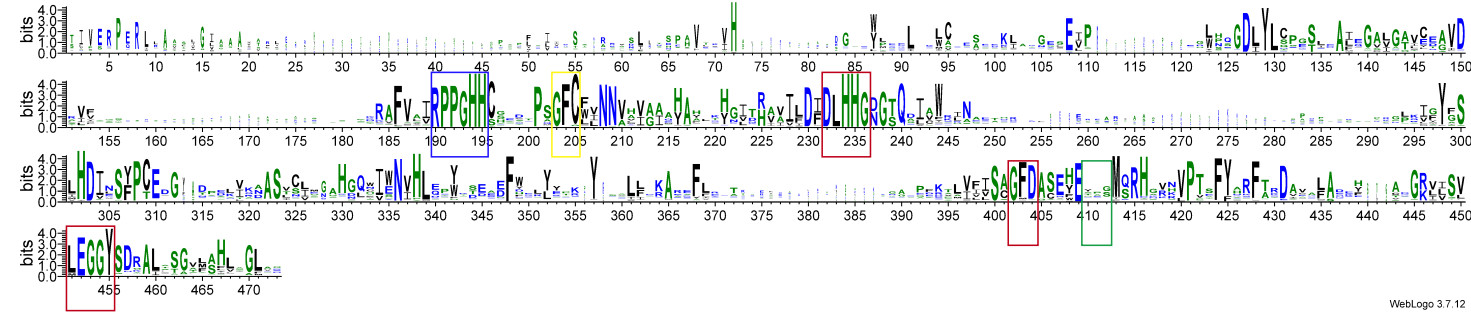**Subcluster 1g**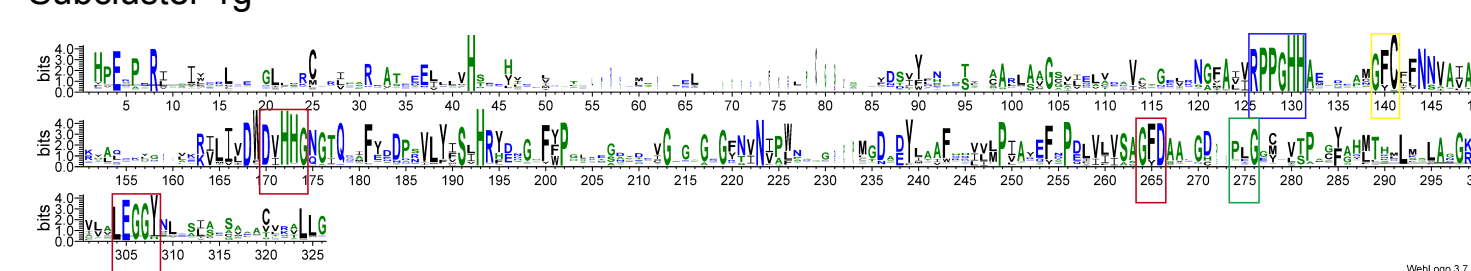

**C****Subcluster 2a**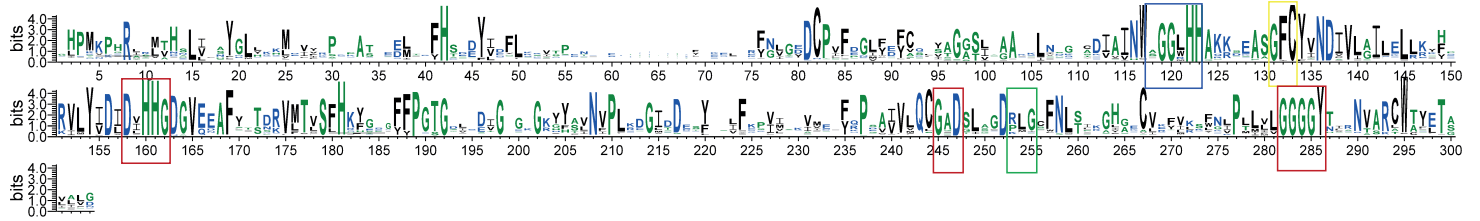**Subcluster 2b**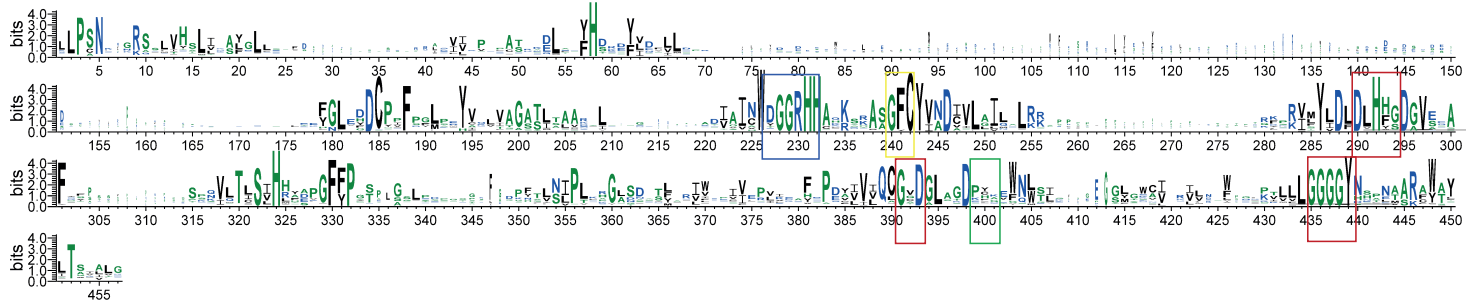**Subcluster 2c**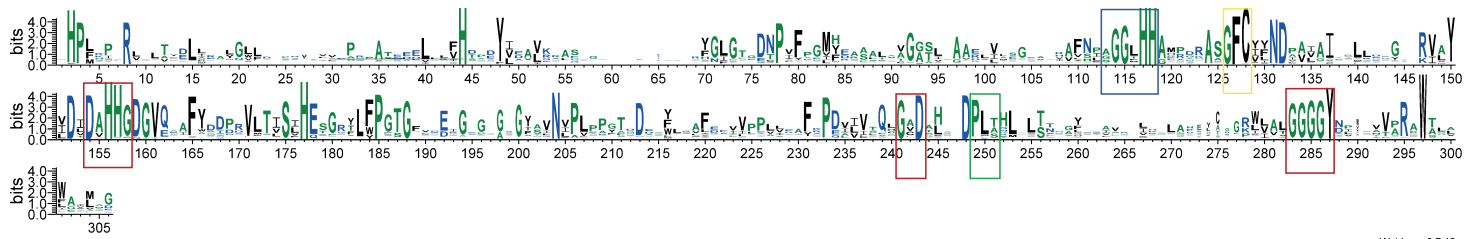**Subcluster 2d**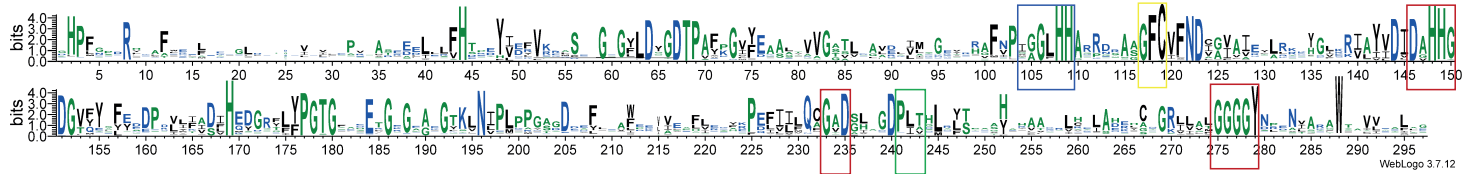**Cluster 3**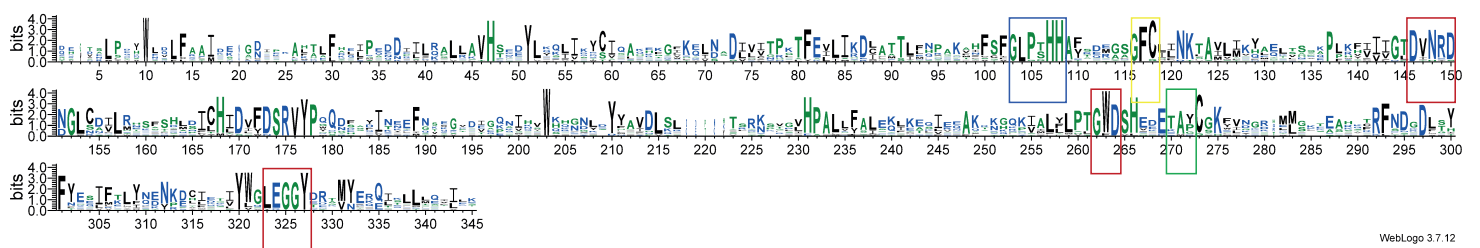**Cluster 4**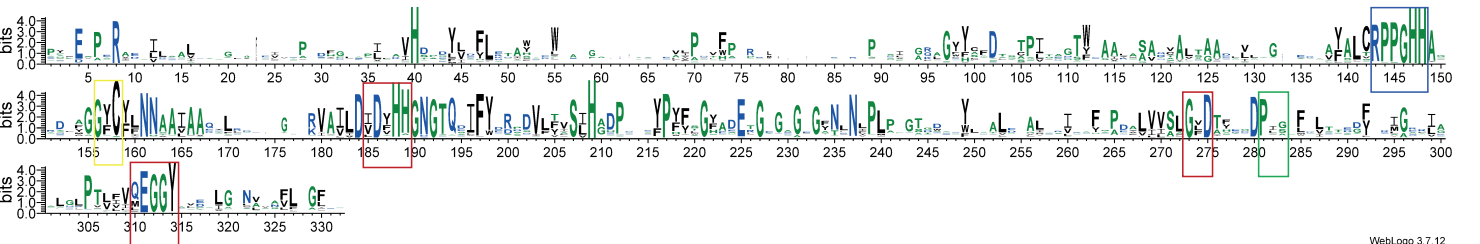



**d****Subcluster 5a**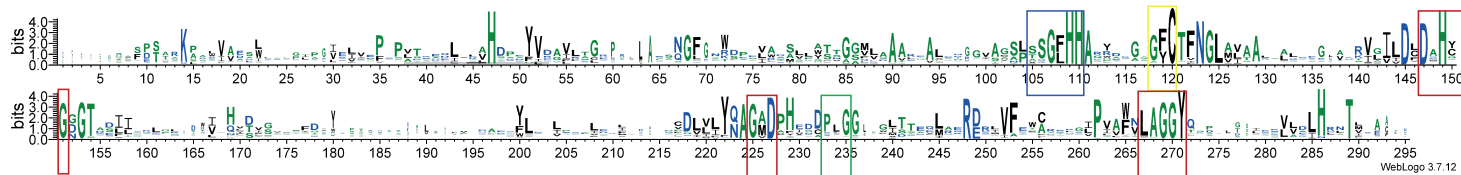**Subcluster 5b**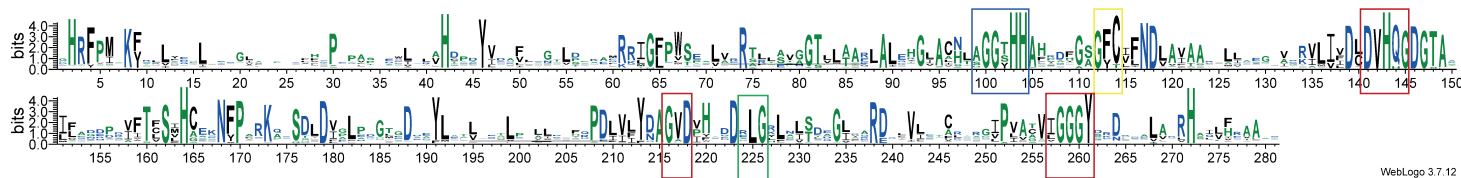**Subcluster 5c**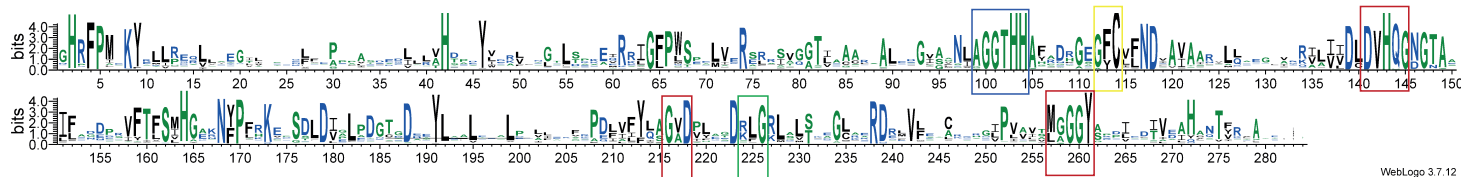**Subcluster 5d**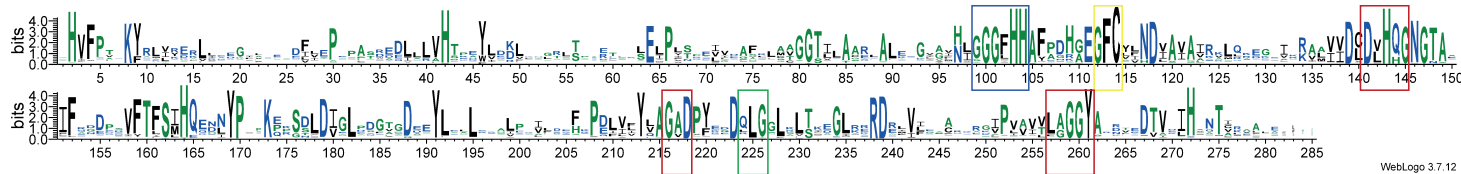**Subcluster 5e**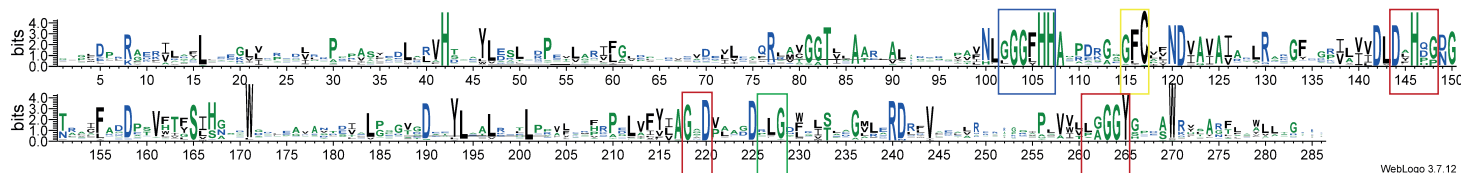**Subcluster 5f**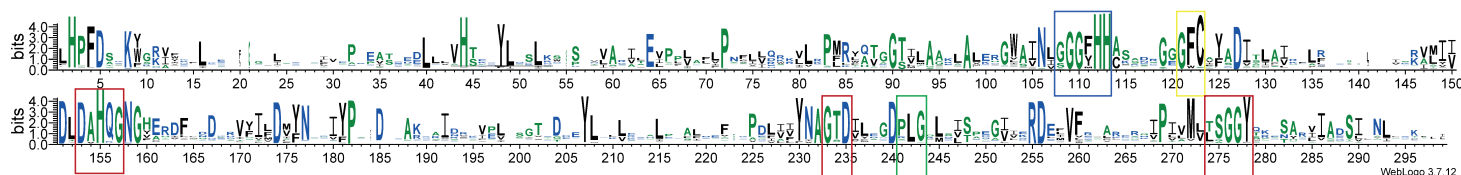**Subcluster 5g**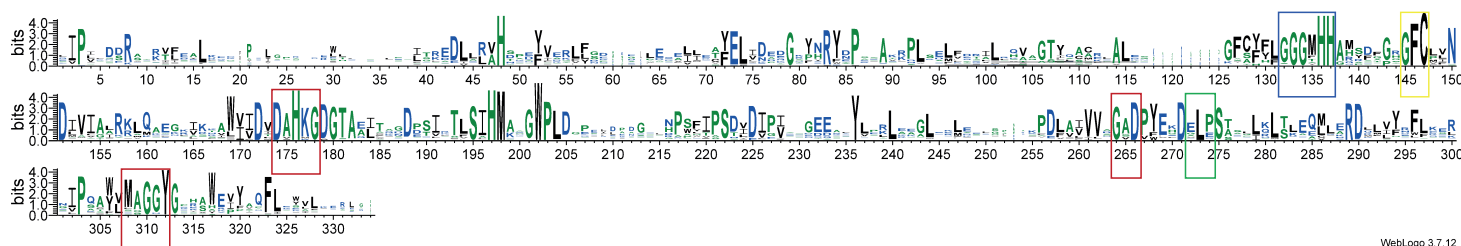

**Supplementary Figure 1: Primary sequence alignment and sequence logo representations of selected deacylases representing all clusters 1-5 and the sub-clusters.**

- a** Show are the following sequences of the following deacylases representing the five clusters and the sub-clusters (code: sub-cluster, accession number/protein name/species): 1a, AT4G33470.1/HDA14/*Arabidopsis thaliana*; 1b, A0A378F8Q8/HdaH/*Klebsiella pneumoniae*; 1c, A0A021X4K7/Deacetylase (DAC)/*Shinella* sp. DD12; 1d, A0A1X3CVE4/Deacetylase (DAC)/*Neisseria zoodegmatis*; 1e, A0A1R2CWG0/HdaH/*Stentor coeruleus*; 1f, Q02959/HOS3/*Saccharomyces cerevisiae* (strain ATCC 204508 / S288c); 1g, P56524/HDAC4/*Homo sapiens*; 2a, Q92769/HDAC2/*Homo sapiens*; 2b, Q12214/HOS1/*Saccharomyces cerevisiae* (strain ATCC 204508 / S288c); 2c, P39067/AcuC/*Bacillus subtilis* (strain 168); 2d, A0A2E9D287/AcuC/*Chromatiales bacterium*; 3, A0A0W0SGS1/ApaH/*Legionella cherrii*; 4, A0A1Y0KY79/ApaH/*Pseudomonas* sp. M30-35; 5a, A0A385C7X8/HDAC/*Acinetobacter wuhouensis*; 5b, A0A395TF31/HDAC/*Vibrio cholerae*; 5c, A0A2Z4RAM2/HDAC/*Moraxella bovis*; 5d, I4B797HdaH/*Turneriella parva* (strain ATCC BAA-1111 / DSM 21527 / NCTC 11395 / H) (*Leptospira parva*); 5e, A0A1I2D6R7/AcuC/*Nannocystis exedens*; 5f, Q96DB2/HDAC11/*Homo sapiens*; 5g, A0A2K9NTX8/AcuC/*Bacteriovorax stolpii* (*Bdellovibrio stolpii*). All sequences were aligned using the T-COFFEE multiple sequence alignment server<sup>1</sup>. The important catalytic residues are highlighted. The secondary structure elements and numbering is shown for the deacylase shown at the top of the amino acid sequences above the sequence alignment. The alignment was created by ESPript version 3.0<sup>2</sup>.
- b** Logo representation of enzymes of cluster 1. For each subcluster a sequence logo representation is shown. The important residues are highlighted. Blue box: double-His motif with the second His acting as catalytic base/acid (*KpHdaH*: H143-H144); yellow box: conserved GFC-motif lining the substrate binding channel; brown boxes: Asp-His-Asp for coordination of the catalytic Zn<sup>2+</sup>-ion and the XGGY-motif lining the foot pocket and the catalytic Tyr (*KpHdaH*: Y313); green box: RPP-motif lining the foot pocket.
- c** Logo representation of enzymes of cluster 2, 3 and 4. For each cluster 2 a sequence logo representation is shown for each subcluster. The important residues are highlighted. Colour coding as described in b.
- d** Logo representation of enzymes of cluster 5. For each subcluster a sequence logo representation is shown. The important residues are highlighted. Colour coding as described in b.

a

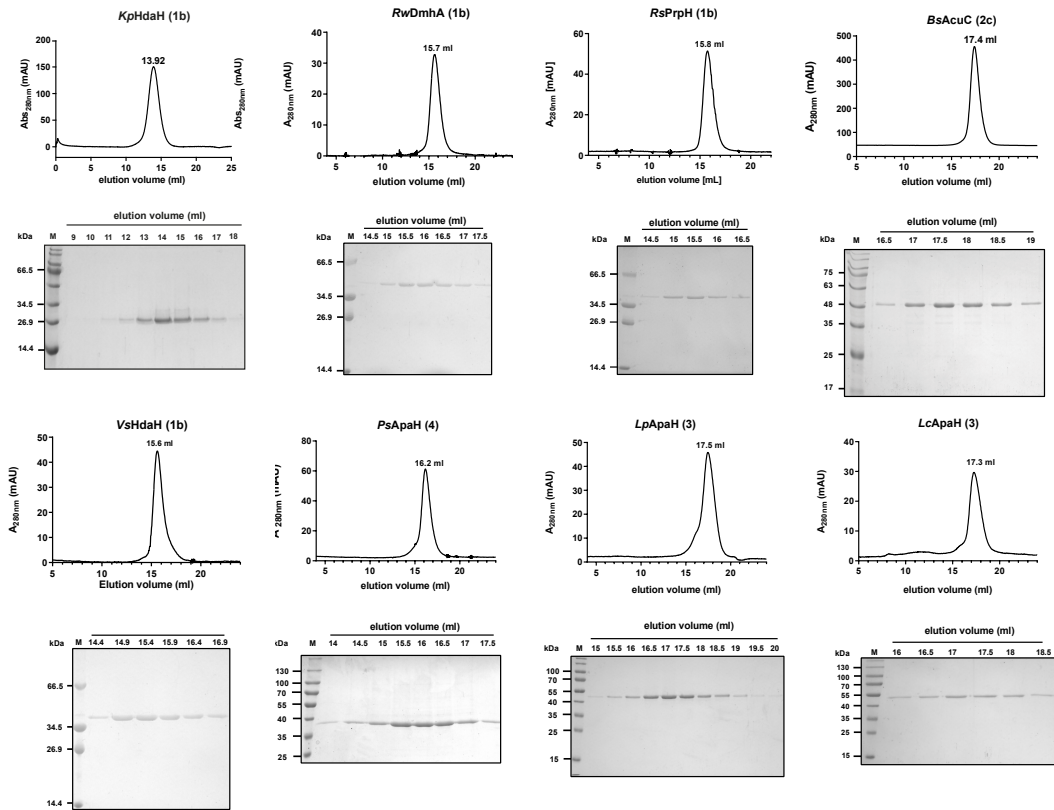

b

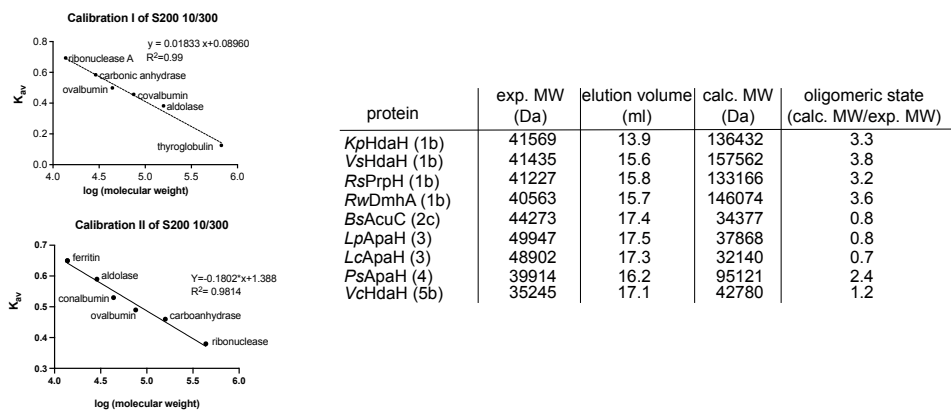

**Supplementary Figure 2: Purification and analytical size-exclusion chromatography (SEC) of all purified bacterial deacylases.**

- a** Analytical size-exclusion chromatography (SEC) of all bacterial deacylases. 300 µg of bacterial deacylases were analysed on a Superdex 200 Increase 10/300 GL column. The elution volumes and calculated molecular weights in comparison to expected molecular weights are used to calculate an oligomeric state. The calculated molecular weights were obtained based on the elution volume using a calibration curve. Below the SEC chromatograms, the SDS-PAGE gels were shown analysing fractions of the observed absorption peak at 280 nm ( $A_{280nm}$ ). SDS-PAGE was stained using Coomassie Brilliant Blue (CBB). Source data are provided as Source Data file.
- b** The elution volumes and calculated molecular weights (calc. MW) in comparison to expected molecular weights (exp. MW) are used to calculate the apparent oligomeric states of the enzymes. The calculated molecular weights were obtained based on the elution volume using a calibration curve. Calibration curve I was used for KpHdaH (1b) and the mutants thereof and calibration curve II for the other enzymes. Source data are provided as Source Data file.

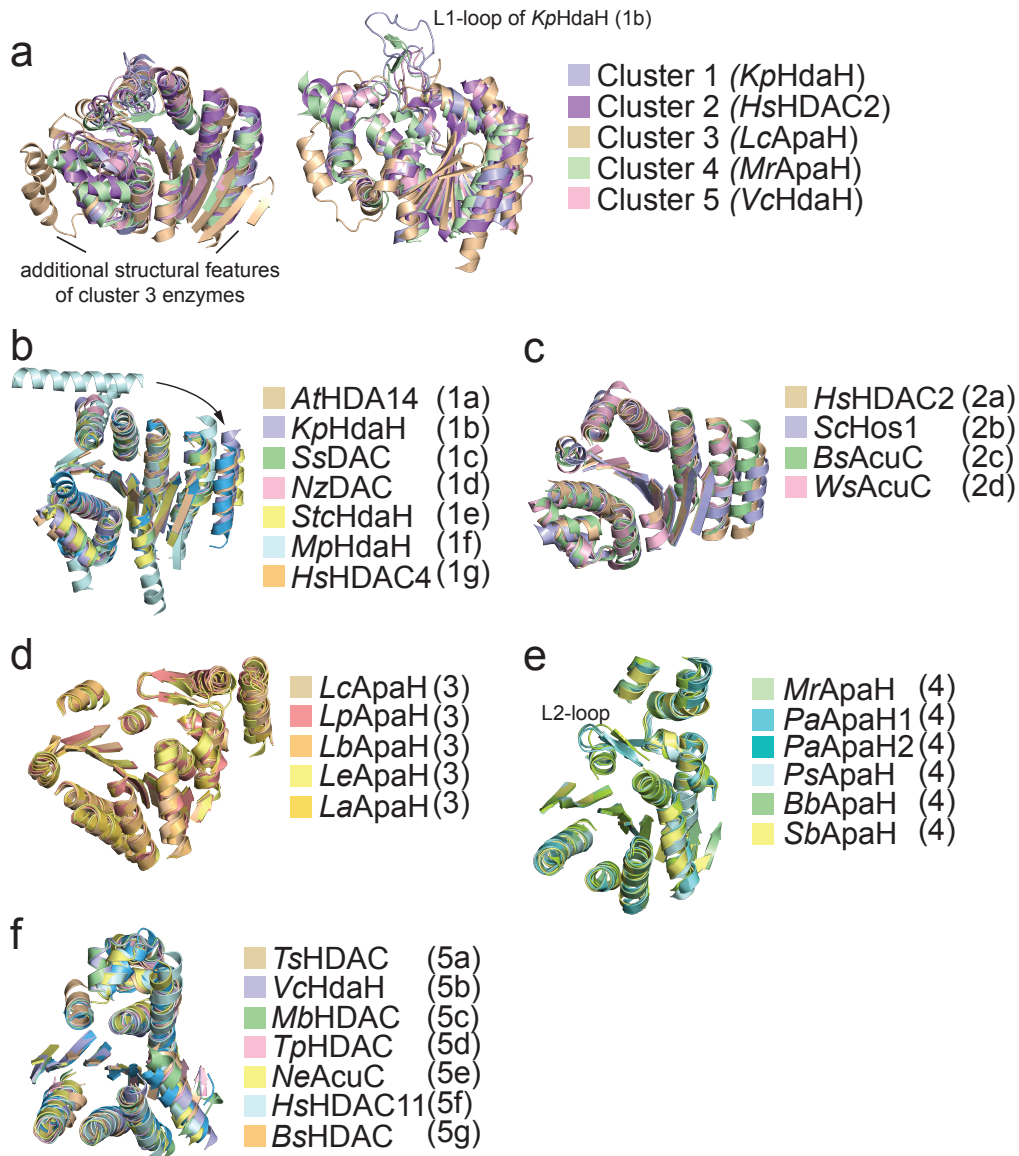

**Supplementary Fig. 3: Structural alignments of core domains of deacylases reveal high structural similarity of enzymes within each main cluster and between the clusters.**

- a** AlphaFold2 structure predictions were performed for selected enzymes representing the sub-clusters. a Superposition of representative enzymes representing the five main clusters (cluster 1-5). All structures show r.m.s.d. values close to 1 Å or lower to the reference structure (Supplementary Data 4). L1-loop of *KpHdaH* (1b) and the additional structural features of cluster 3 enzymes, i.e. the extended  $\beta$ -sheet and the additional  $\alpha$ -helices, enzymes are highlighted.
- b** Superposition of representative enzymes of cluster 1 (sub-clusters 1a-1g). All structures show r.m.s.d. values close to 1 Å or lower to the reference structure (Supplementary Data 4). We observed two exceptions: Firstly, the eukaryotic enzyme HdaH of *Malassezia pachydermatis* (1f) compared to the bacterial *KpHdaH* (1b) with an r.m.s.d value of 7 Å in the comparison of cluster 1 enzymes. *M. pachydermatis* (1f) shows a reorganization of the catalytic core domain, i.e. the  $\alpha$ -helix usually lining the central  $\beta$ -sheet is displaced by approximately 90°. Moreover, this enzyme shows an extended  $\alpha$ -helical N-terminal domain preceding the catalytic domain.
- c** Superposition of representative enzymes of cluster 2 (sub-clusters 2a-2d). All structures show r.m.s.d. values close to 1 Å or lower to the reference structure (Supplementary Data 4).
- d** Superposition of representative enzymes of cluster 3. All structures show r.m.s.d. values close to 1 Å or lower to the reference structure (Supplementary Data 4). The cluster 3 enzyme of *L. cherrii* shows an r.m.s.d to the structure of *KpHdaH* (1b) of 5.5 Å in the comparison of enzymes representing the main-clusters. The structural dissimilarity of the cluster 3 enzymes is due to the additional structural features, i.e. the extended  $\beta$ -sheet and the additional  $\alpha$ -helices compared in the catalytic core.
- e** Superposition of representative enzymes of cluster 4. All structures show r.m.s.d. values close to 1 Å or lower to the reference structure (Supplementary Data 4).
- f** Superposition of representative enzymes of cluster 5 (sub-clusters 5a-5g). All structures show r.m.s.d. values close to 1 Å or lower to the reference structure (Supplementary Data 4).

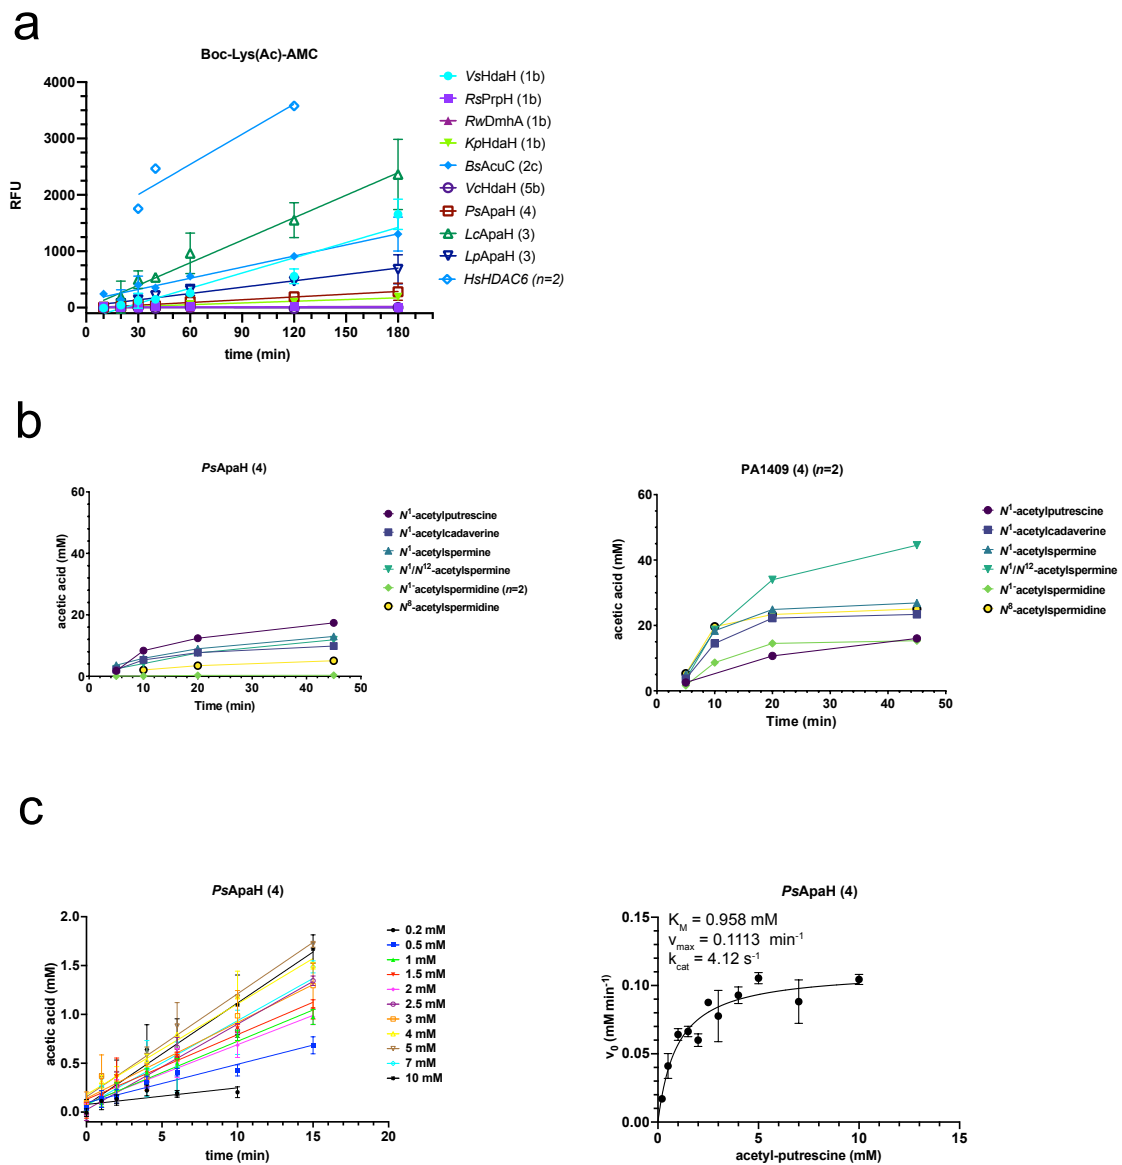

### Supplementary Figure 4: Determination of the dynamic ranges for the pre-screening assays.

- a** Determination of the dynamic range for the pre-screening of the bacterial deacylases to use Boc-Lys(Ac)-AMC as a substrate. 20 nM enzyme and 20  $\mu$ M Boc-Lys(Ac)-AMC substrate was used and the fluorescence of the released AMC-fluorophore was measured. An assay-incubation time of 30 min was selected as enzymes show a linear correlation of the fluorescence signal and assay incubation time. The experiments were conducted in three biologically independent replicates ( $n=3$ ) except for *HsHDAC6* (1g) ( $n=2$ ). Shown are means $\pm$ SD. For *HsHDAC6* (1g) means are shown. Source data are provided as Source Data file.
- b** Determination of the dynamic range for the screening of *PsApaH* (4) on its capacity to deacetylate acetylated polyamines as substrates. 200 nM *PsApaH* (4) (left panel) and 100 nM PA1409 enzyme (right panel) and 3 mM acetylated polyamines as indicated. Acetylated polyamines were used as substrates and the released acetate was detected by a coupled enzymatic assay by formation of NADH+H<sup>+</sup> from NAD<sup>+</sup> (K-ACET, Megazyme). An assay-incubation time of 20 min was selected as enzymes show a linear correlation of the absorption at 340 nm and assay incubation time. The release of acetate was normalized to the enzyme concentration used. The experiments were conducted in three or two biologically independent replicates ( $n=3$  and  $n=2$ ) for *PsApaH* (4) and PA1409, respectively. Shown are means $\pm$ SD for *PsApaH* (4) and means for PA1409. Source data are provided as Source Data file.
- c** Michaelis-Menten kinetics for the acetyl-putrescine deacetylation by *PsApaH* (4). Initial reaction rates were ( $v_0$ ) determined using 200 nM *PsApaH* (4) and increasing concentrations of acetyl-putrescine as indicated and measuring the released acetate. Linearity was present up to 15 min assay time. The reaction rates ( $v_0$ ) were plotted as a function of the acetylputrescine concentration resulting in a hyperbolic curve that was fitted by a Michaelis-Menten equation resulting  $K_M$ ,  $v_{max}$  and  $k_{cat}$ . The experiments were conducted in three biologically independent replicates ( $n=3$ ). Shown are means $\pm$ SD. Source data are provided as Source Data file.

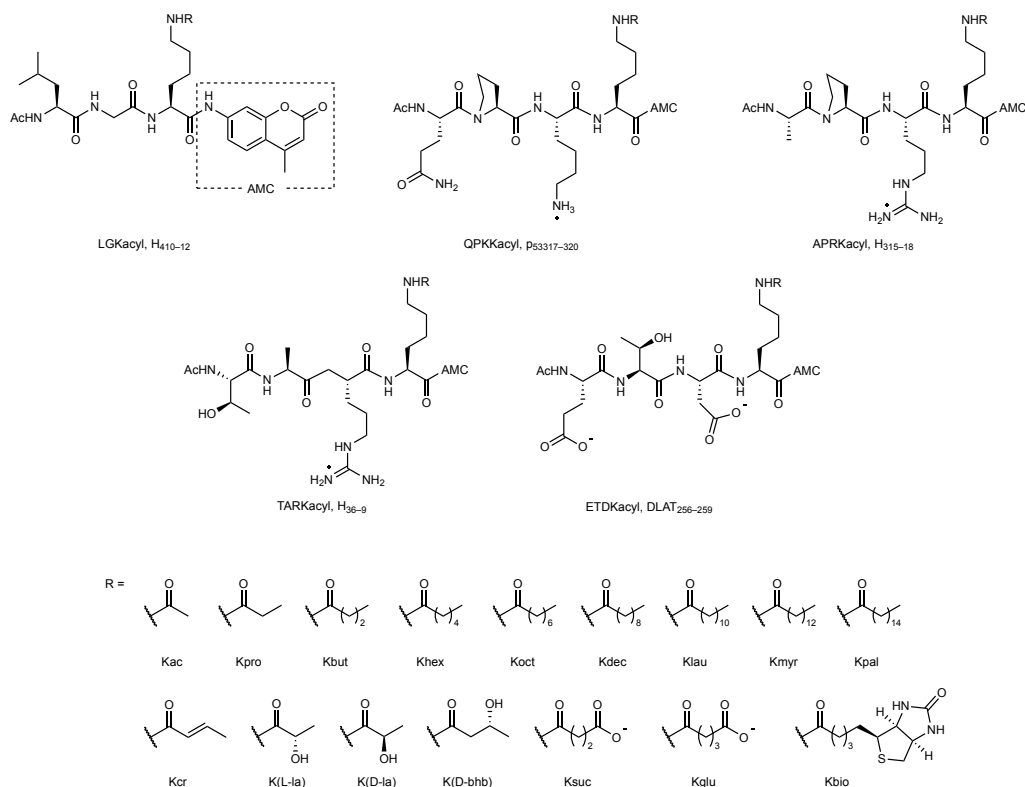

**Supplementary Figure 5: Chemical structures of peptides and acyl-chain types used as substrates for deacylation by selected bacterial deacylases.**

- Peptides with varying sequences used to study substrate preference for various bacterial deacylases. The peptides suitable to detect a successful lysine deacylation by release of an C-terminally attached AMC (7-amino-4-methylcoumarin) fluorophore upon trypsin cleavage (Fluor-deLys-assay). The AMC fluorophore is quenched in the peptide but is fluorescent in its free form. The peptides used were derived from histone H3 (APRK<sub>acyl</sub>, H<sub>315-18</sub> or TARK<sub>acyl</sub>, H<sub>36-9</sub>), histone H4 (LGK<sub>acyl</sub>, H<sub>410-12</sub>) tumor suppressor protein p53 (QPKK<sub>acyl</sub>, p53<sub>317-320</sub>) and DLAT (Dihydrolipoyllysine-residue acetyltransferase component of pyruvate dehydrogenase complex; ETDK<sub>acyl</sub>, DLAT<sub>256-259</sub>). Charges were shown as expected at physiological pH.
- The tri- or tetrapeptide sequences were modified at the C-terminal lysine side chain by various acyl-chain types. These acyl-chains range from short aliphatic acylations, i.e. acetyl (C-2; K<sub>ac</sub>), propionyl (C-3; K<sub>pro</sub>), butyryl (C-4; K<sub>but</sub>), over medium-sized aliphatic acylations, i.e. hexanoyl (C-6; K<sub>hex</sub>), octanoyl (C-8; K<sub>oct</sub>), decanoyl (C-10; K<sub>dec</sub>), to longer-chain aliphatic acylations, i.e. lauroyl (C-12; K<sub>lau</sub>), myristoyl (C-14; K<sub>myr</sub>) and palmitoyl (C-16; K<sub>pal</sub>). Moreover, we also analyzed acylations such as the unsaturated crotonyl (K<sub>cro</sub>), the branched acylations L-lactyl (K<sub>L-la</sub>), D-β-hydroxybutyryl (K<sub>D-bhb</sub>), charged-acylations, such as succinyl (K<sub>suc</sub>) and glutaryl (K<sub>glu</sub>) and biotinyl (K<sub>bio</sub>) (Fig. 3a; Supplementary Fig. 5; Supplementary Fig. 6). As positive controls, we analyzed the conversion of these lysine acylations by human HDAC3/NCOR2 (K<sub>ac</sub>, K<sub>pro</sub>, K<sub>but</sub>, K<sub>cro</sub>, K<sub>L-la</sub>, K<sub>D-bhb</sub>), human SIRT2 (K<sub>hex</sub>, K<sub>oct</sub>, K<sub>dec</sub>, K<sub>lau</sub>, K<sub>myr</sub>, K<sub>pal</sub>) and human SIRT5 (K<sub>suc</sub>, K<sub>glu</sub>). For deacylation of K<sub>bio</sub>, we did not have a positive control (Fig. 3a; Supplementary Fig. 5). Charges were shown as expected at physiological pH. As AMC fluorescence does not follow a linear trend at high concentrations, we obtained a calculated conversions >100% for some enzyme-peptide combinations. To this end, we categorized these values in a single category to all conversions >48% on the heat map (Fig. 3a; Supplementary Fig. 6).



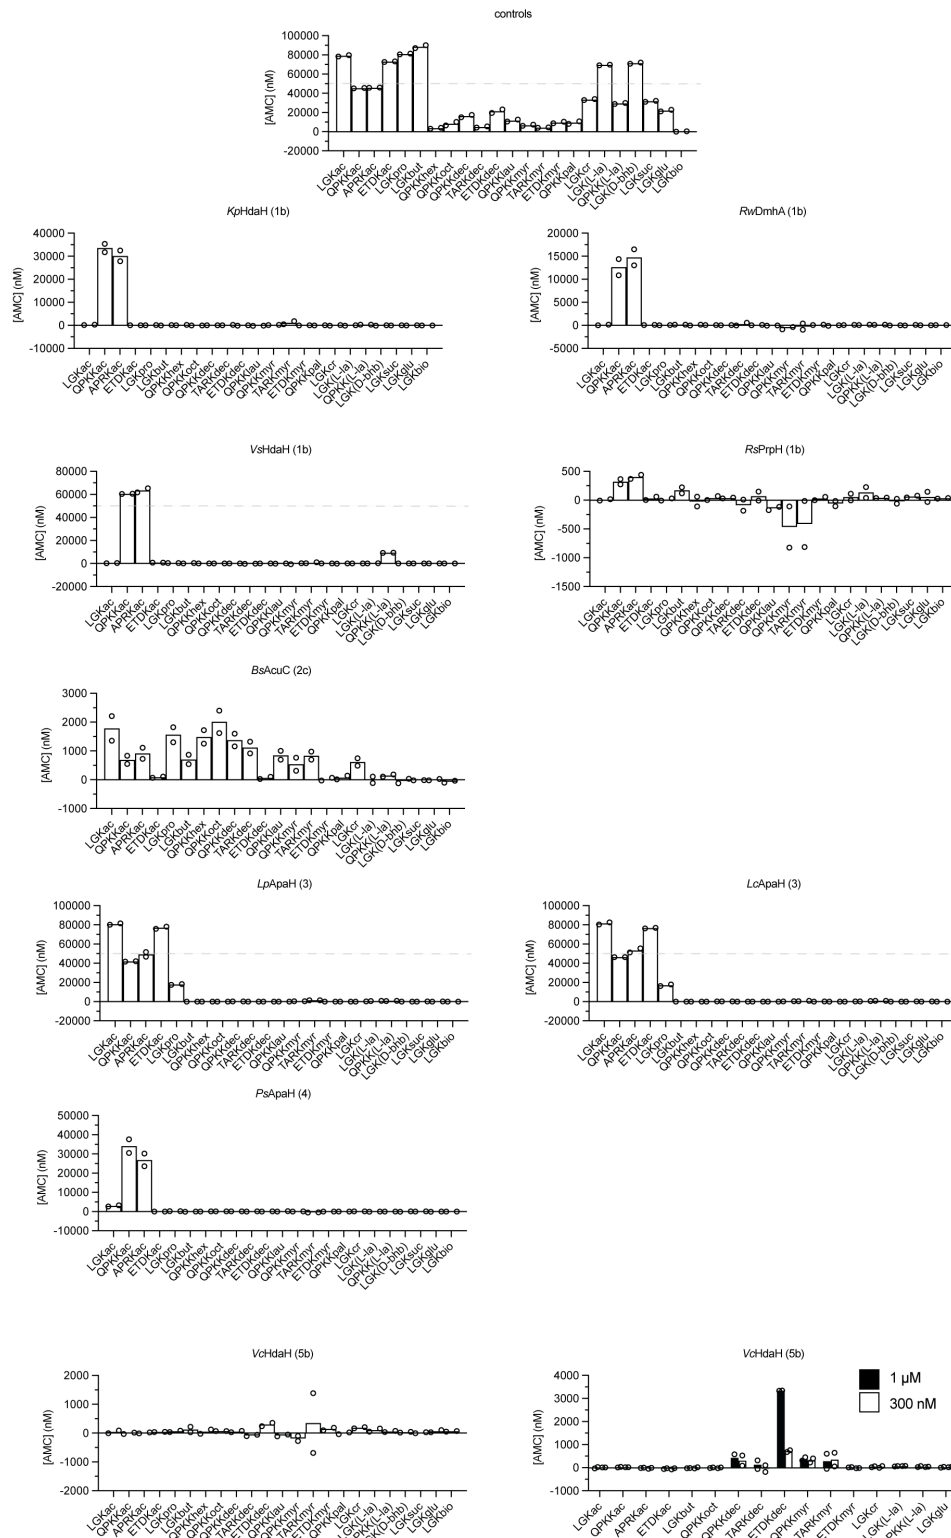

**Supplementary Figure 6: Bar graphs obtained for the pre-screening to uncover acyl-chain preferences of selected bacterial deacylases.** A Fluor-de-Lys assay-based screening was performed using histone H3 (APRK<sub>acyl</sub>, H3<sub>15-18</sub> or TARK<sub>acyl</sub>, H3<sub>6-9</sub>), histone H4 (LGK<sub>acyl</sub>, H4<sub>10-12</sub>), p53 (QPKK<sub>acyl</sub>, p53<sub>317-320</sub>) and DLAT derived tri- or tetrapeptide sequences. Depicted is the conversion of peptide in released [AMC] in  $\mu\text{M}$ . AMC fluorescence does not follow a linear trend at high concentrations, which explains calculated conversions  $>100\%$ . To this end, a single category is given to all conversions  $>48\%$  and the bar graphs show a maximal conversion of  $50 \mu\text{M}$  AMC (dashed grey line). Positive controls were: HDAC3/NCOR2 (K<sub>ac</sub>, K<sub>pro</sub>, K<sub>but</sub>, K<sub>cr</sub>, K<sub>(L-la)</sub>, K<sub>(D-bhb)</sub>), SIRT2 (K<sub>hex</sub>, K<sub>oct</sub>, K<sub>dec</sub>, K<sub>lau</sub>, K<sub>myr</sub>, K<sub>pal</sub>) and SIRT5 (K<sub>suc</sub>, K<sub>glu</sub>). For the H4-derived peptide LGK<sub>bio</sub> no positive control was available. Enzyme concentration was set to  $100 \text{ nM}$ . As we did not observe a strong conversion for VcHdaH (5b), follow-up screening was performed at higher enzyme concentrations of  $300 \text{ nM}$  and  $1 \mu\text{M}$ . This data is the basis for the heatmap shown in Fig. 3a. The experiment was performed in two independent replicates ( $n=2$ ). Bars depict means. Source data are provided as Source Data file.

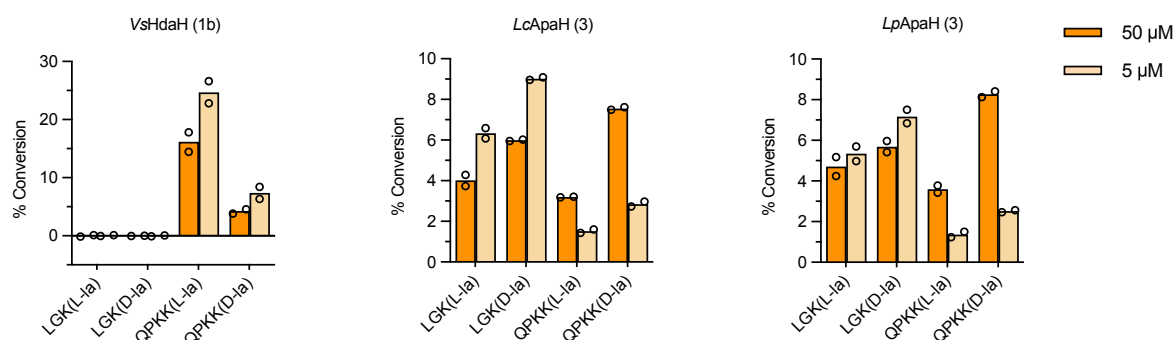

**Supplementary Figure 7: Bar graphs obtained for the follow-up screening to uncover de-D/L-lactylase activity for VsHdaH (1b), LcApaH (3) and LpApaH (3).** A Fluor-de-Lys assay-based screening was performed using histone H4 (LGK<sub>L-Ia</sub>/LGK<sub>D-Ia</sub>, H4<sub>10-12</sub>) and p53 (QPKK<sub>L-Ia</sub>/QPKK<sub>D-Ia</sub>, p53<sub>317-320</sub>) tri- and tetrapeptide sequences. Depicted is the conversion of peptide in released [AMC] in μM. The de-D/L-lactylase selectivity assays were performed at 100 nM (VsHdaH (1b)) or 300 nM (LcApaH (3), LpApaH (3)), and at 50 μM and 5 μM substrate concentration as indicated. This data is the basis for the heatmap shown in Fig. 3a. The experiment was performed in two independent replicates ( $n=2$ ). Bars depict means. Source data are provided as Source Data file.



## KpHdaH (1b) (discontinuous)

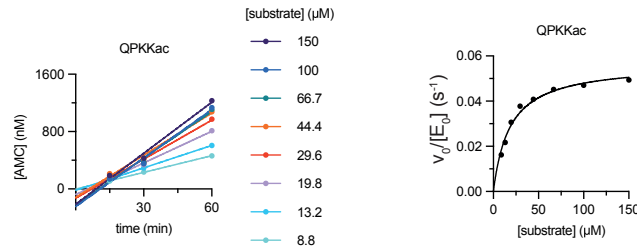

## RwDmhA (1b) (discontinuous)

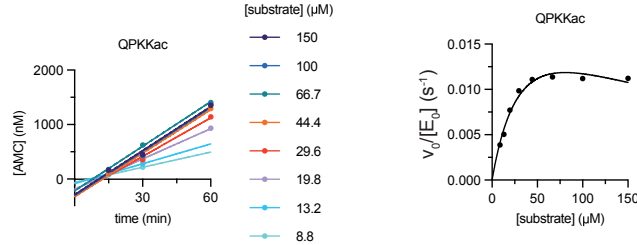

## VsHdaH (1b) (discontinuous)

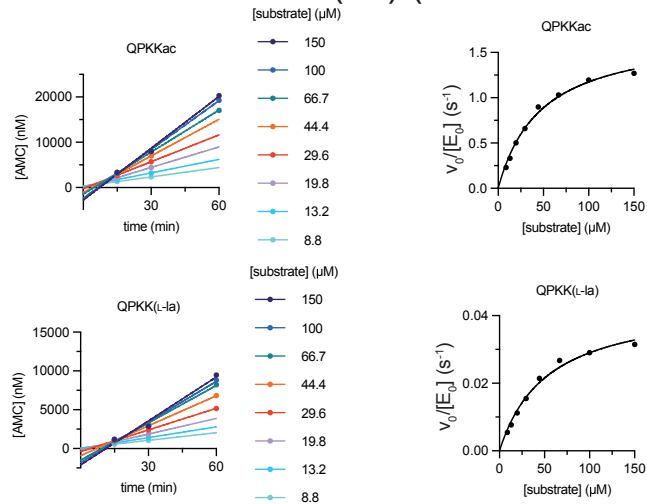

## PsApaH (4) (discontinuous)

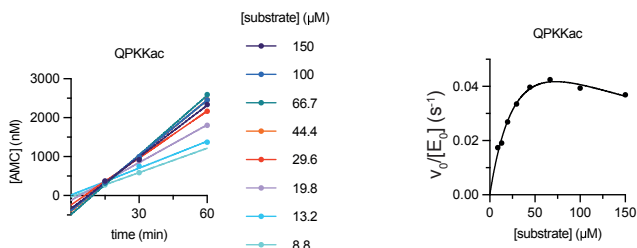

**Supplementary Figure 8: Michaelis-Menten kinetics obtained for deacylation of the p53-derived QPKK-based peptides and acyl-chain types by a discontinuous assay format for bacterial deacylases *KpHdaH* (1b), *PsApaH* (4), *RwDmhA* (1b) and *VsHdaH* (1b).** For the QPKK-based substrates the discontinuous method was used for enzyme kinetics. Michaelis-Menten kinetics were performed to reveal the peptide substrate and acyl-chain preference of bacterial deacylases. The peptide sequences and acyl-chain types are indicated (p53<sub>317-320</sub>; QPKK<sub>ac</sub>/ QPKK<sub>L-Ia</sub>). Left panels: Conversion of the AMC fluorophore as a function of time results in the initial reaction rates,  $v_0$ , (unit: nM\*s<sup>-1</sup>). Right panels: The initial reaction rates,  $v_0$ , were divided by the total enzyme concentration,  $[E_0]$  (unit: nM) to yield the observed rate constants,  $v_0/[E_0]$ , (units: s<sup>-1</sup>, i.e.  $v_0/[E_0] = [AMC]s^{-1}/[E_0]$ ). The values obtained for  $v_0/[E_0]$  were plotted as a function of the substrate concentration. The data was fitted to the hyperbolic Michaelis-Menten equation resulting the  $k_{cat}$ , i.e. the first-order rate constant under conditions of substrate saturation ( $k_{cat} = v_{max}/[E_0]$ ; unit: s<sup>-1</sup>), and  $K_M$  value (unit: nM). The experiment was performed in duplicates and the graph depicts the means of both recorded independent replicates ( $n=2$ ). Source data are provided as Source Data file.

## BsAcuC (2c) (continuous)

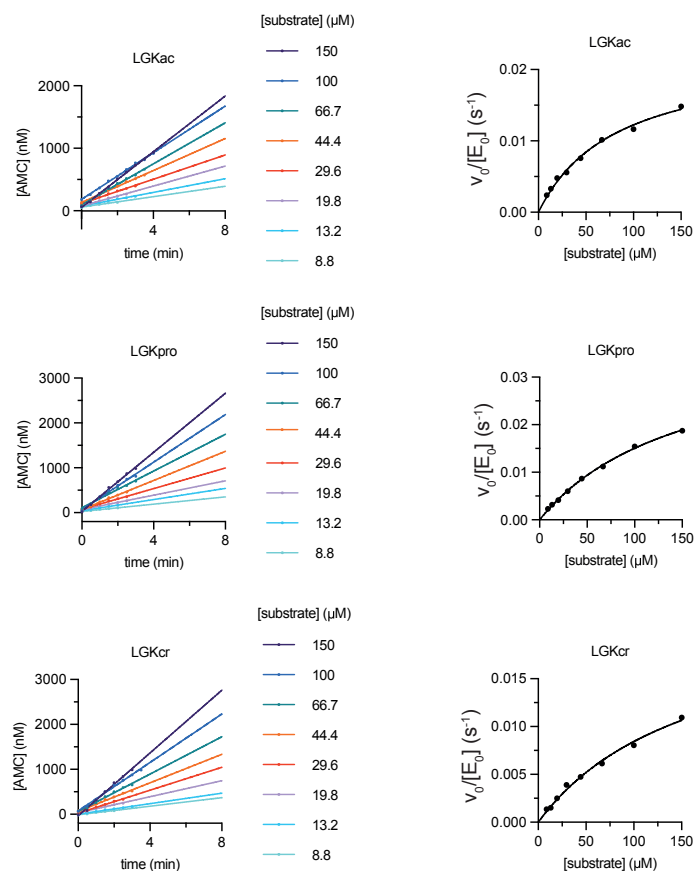

### Supplementary Figure 9: Michaelis-Menten kinetics obtained for deacylation of the LGK-based peptides and acyl-chain types by a continuous assay format for bacterial deacylase *BsAcuC* (2c)

For the LGK-based substrates the continuous method was used for enzyme kinetics. Michaelis-Menten kinetics were performed to reveal the acyl-chain preference of *BsAcuC* (2c). The peptide sequences and acyl-chain types are indicated (histone H4<sub>10-12</sub>; LGK<sub>ac</sub>/LGK<sub>pro</sub>/LGK<sub>cro</sub>). Left panels: Conversion of the AMC fluorophore as a function of time results in the initial reaction rates,  $v_0$ , (unit:  $\text{nM}\cdot\text{s}^{-1}$ ). Right panels: The initial reaction rates,  $v_0$ , were divided by the total enzyme concentration,  $[E_0]$  (unit:  $\text{nM}$ ) to yield the observed rate constants,  $v_0/[E_0]$ , (units:  $\text{s}^{-1}$ , i.e.  $v_0/[E_0] = [\text{AMC}]\text{s}^{-1}/[E_0]$ ). The values obtained for  $v_0/[E_0]$  were plotted as a function of the substrate concentration. The data was fitted to the hyperbolic Michaelis-Menten equation resulting the  $k_{\text{cat}}$ , i.e. the first-order rate constant under conditions of substrate saturation ( $k_{\text{cat}}=v_{\text{max}}/[E_0]$ ; unit:  $\text{s}^{-1}$ ), and  $K_M$  value (unit:  $\text{nM}$ ). The experiment was performed in duplicates and the graph depicts the means of both recorded independent replicates ( $n=2$ ). Source data are provided as Source Data file.

## LpApaH (3) (discontinuous)

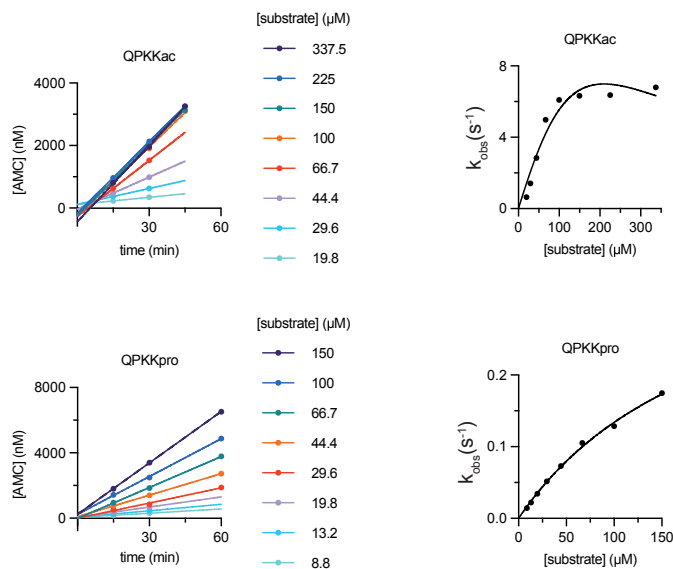

## LcApaH (3) (discontinuous)

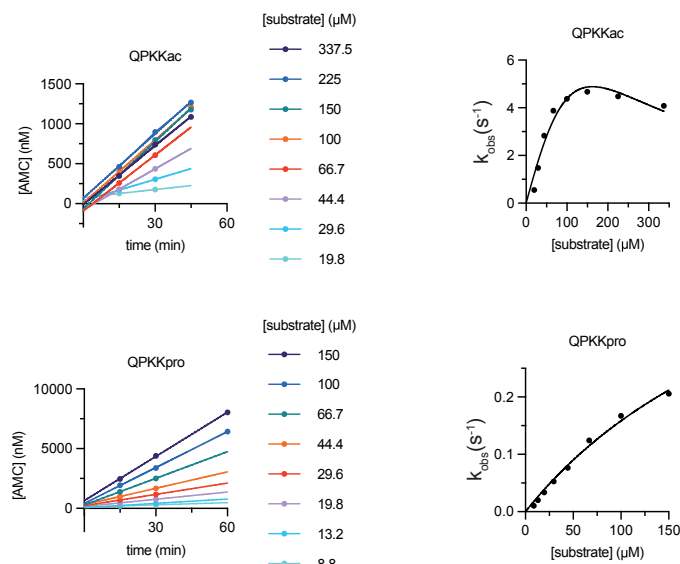

**Supplementary Figure 10: Michaelis-Menten kinetics obtained for deacetylation and depropylation of the p53-derived QPKK-based peptides and acyl-chain types by a discontinuous assay format for bacterial deacylases LpApaH (3) and LcApaH (3).** For the QPKK-based substrates the discontinuous method was used for enzyme kinetics. Michaelis-Menten kinetics were performed to reveal the peptide substrate and acyl-chain preference of bacterial deacylases. The peptide sequences and acyl-chain types are indicated (p53<sub>317-320</sub>; QPKK<sub>ac</sub>/QPKK<sub>pro</sub>). Left panels: Conversion of the AMC fluorophore as a function of time results in the initial reaction rates,  $v_0$ , (unit:  $nM \cdot s^{-1}$ ). Right panels: The initial reaction rates,  $v_0$ , were divided by the total enzyme concentration,  $[E_0]$  (unit:  $nM$ ) to yield the observed rate constants,  $v_0/[E_0]$ , (units:  $s^{-1}$ , i.e.  $v_0/[E_0] = [AMC]s^{-1}/[E_0]$ ). The values obtained for  $v_0/[E_0]$  were plotted as a function of the substrate concentration. The data was fitted to the hyperbolic Michaelis-Menten equation resulting the  $k_{cat}$ , i.e. the first-order rate constant under conditions of substrate saturation ( $k_{cat} = v_{max}/[E_0]$ ; unit:  $s^{-1}$ ), and  $K_M$  value (unit:  $nM$ ). The experiment was performed in duplicates and the graph depicts the means of both recorded independent replicates ( $n=2$ ). Source data are provided as Source Data file.

### LcApaH (3) (continuous)

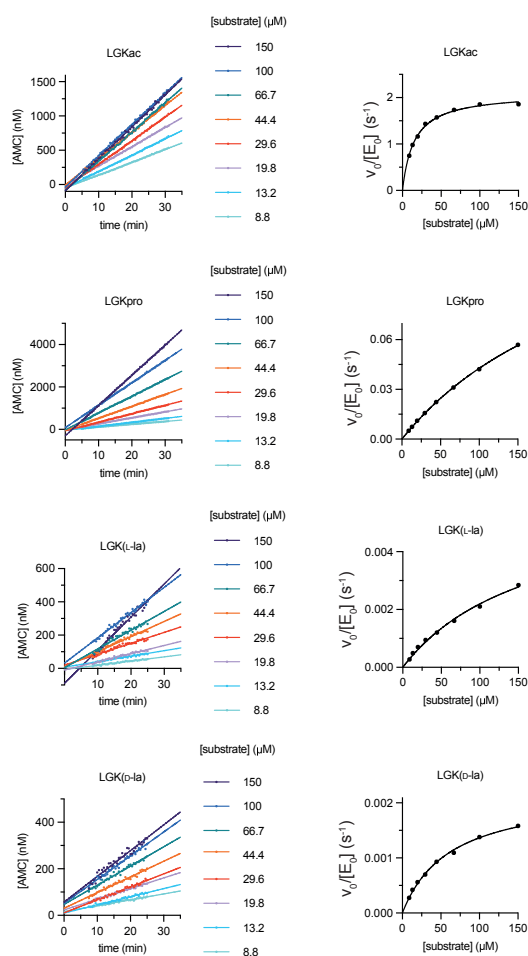

### LpApaH (3) (continuous)

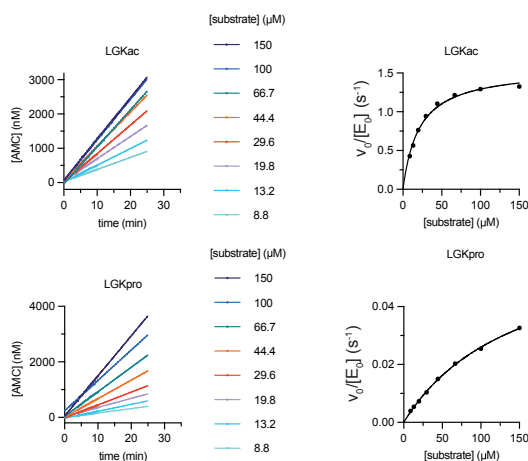

**Supplementary Figure 11: Michaelis-Menten kinetics obtained for deacylation of the LGK-based peptides and acyl-chain types for bacterial deacylases LcApaH (3) and LpApaH (3).** For the histone H4-derived LGK<sub>ac</sub>-based substrate peptide the continuous method was used for enzyme kinetics. Michaelis-Menten kinetics were performed to reveal the acyl-chain preference of LcApaH (3) and LpApaH (3). The peptide sequences and acyl-chain types are indicated (histone H4<sub>10-12</sub>; LGK<sub>ac</sub>/LGK<sub>pro</sub>/LGK<sub>L-la</sub>/LGK<sub>D-la</sub>). Left panels: Conversion of the AMC fluorophore as a function of time results in the initial reaction rates,  $v_0$ , (unit: nM\*s<sup>-1</sup>). Right panels: The initial reaction rates,  $v_0$ , were divided by the total enzyme concentration,  $[E_0]$  (unit: nM) to yield the observed rate constants,  $v_0/[E_0]$ , (units: s<sup>-1</sup>, i.e.  $v_0/[E_0] = [\text{AMC}]s^{-1}/[E_0]$ ). The values obtained for  $v_0/[E_0]$  were plotted as a function of the substrate concentration. The data was fitted to the hyperbolic Michaelis-Menten equation resulting the  $k_{\text{cat}}$ , i.e. the first-order rate constant under conditions of substrate saturation ( $k_{\text{cat}} = v_{\text{max}}/[E_0]$ ; unit: s<sup>-1</sup>), and  $K_M$  value (unit: nM). The experiment was performed in duplicates and the graph depicts the means of both recorded independent replicates ( $n=2$ ). Source data are provided as Source Data file.

### KpHdaH (1b)

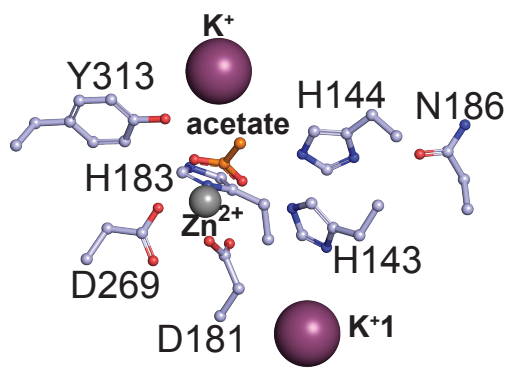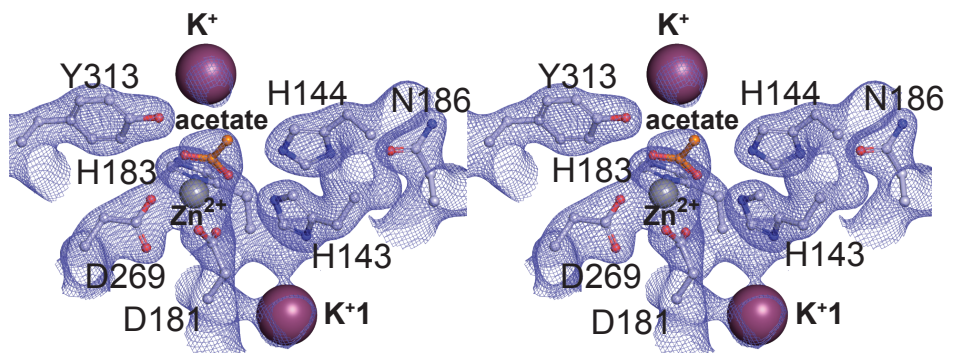

### KpHdaH (1b) H144A

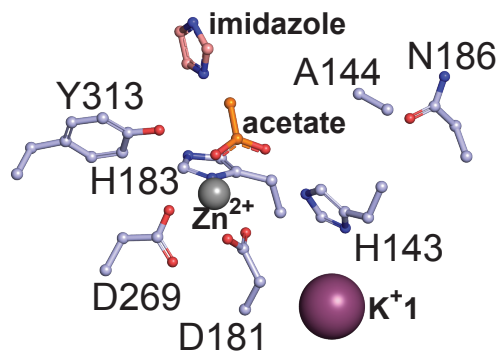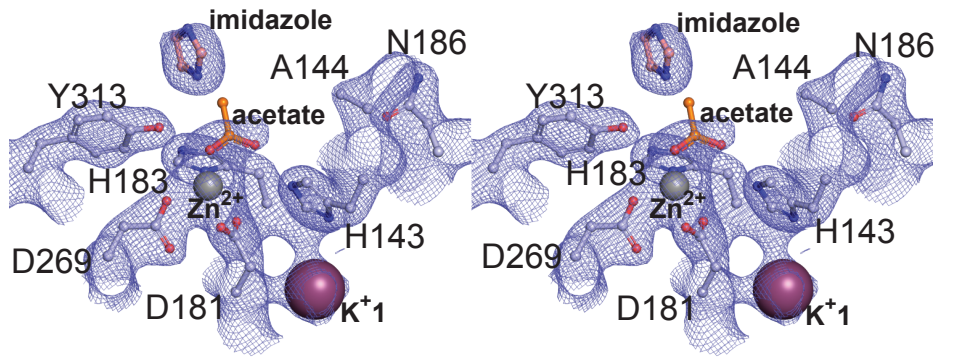

### RwDmhA (1b)

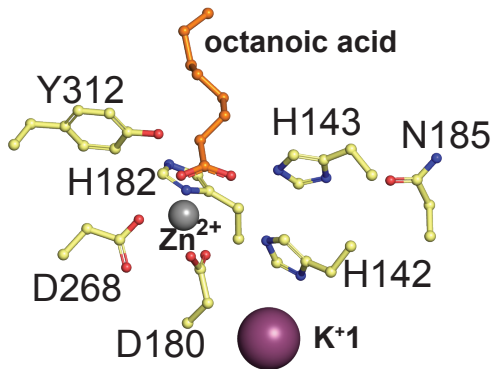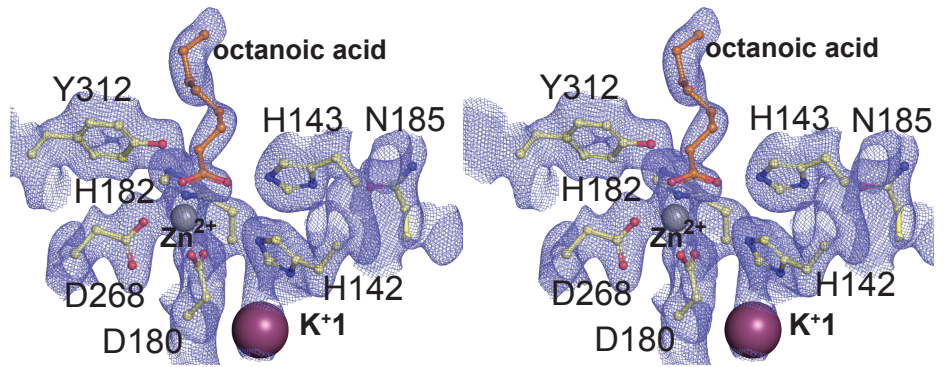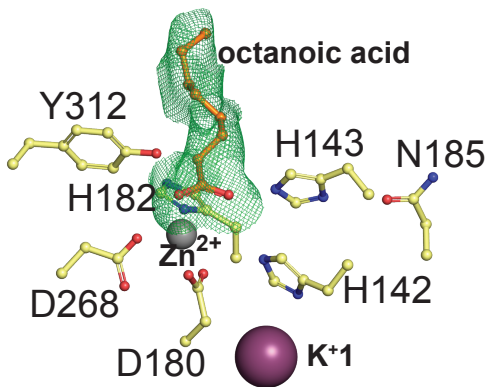

### RsPrpH (1b)

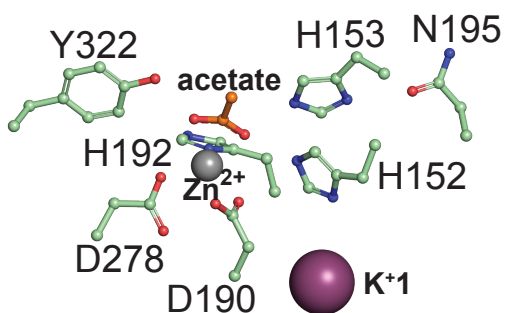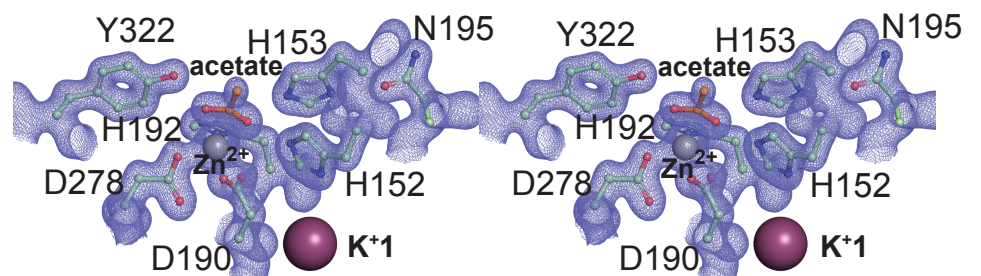

**Supplementary Figure 12: Stereo images of representative electron density for structures of bacterial deacylases solved in this study.**

Stereo figures for the structures of bacterial deacylases of sub-cluster 1b: *KpHdaH*, *KpHdaH* H144A, *RwDmhA* and *RsPrpH* of subcluster 1b. For all structures a representative closeup of the active site is shown on the left, including the catalytic Zn<sup>2+</sup>-ion, the coordinating His and the two Asp residues, the catalytic base His, except for the inactivated *KpHdaH* mutant here the His is mutated to an Ala, and the active site Tyr important to orient and polarize the carbonyl-group of the substrate and to stabilize the tetrahedral intermediate. As stereo images the closeup of the active site is shown with the electron density of the 2F<sub>o</sub>-F<sub>c</sub> map contoured at 1σ in blue. For *RwDmhA* (1b) the F<sub>o</sub>-F<sub>c</sub> omit map is shown in green for the bound octanoic acid (contour level 3σ). In violet spheres the potassium ions are shown, the catalytic Zn<sup>2+</sup>-ion is shown as grey sphere. The stereo diagrams were prepared in wall-eyed viewing mode with PyMOL version 2.3.4<sup>3</sup>.



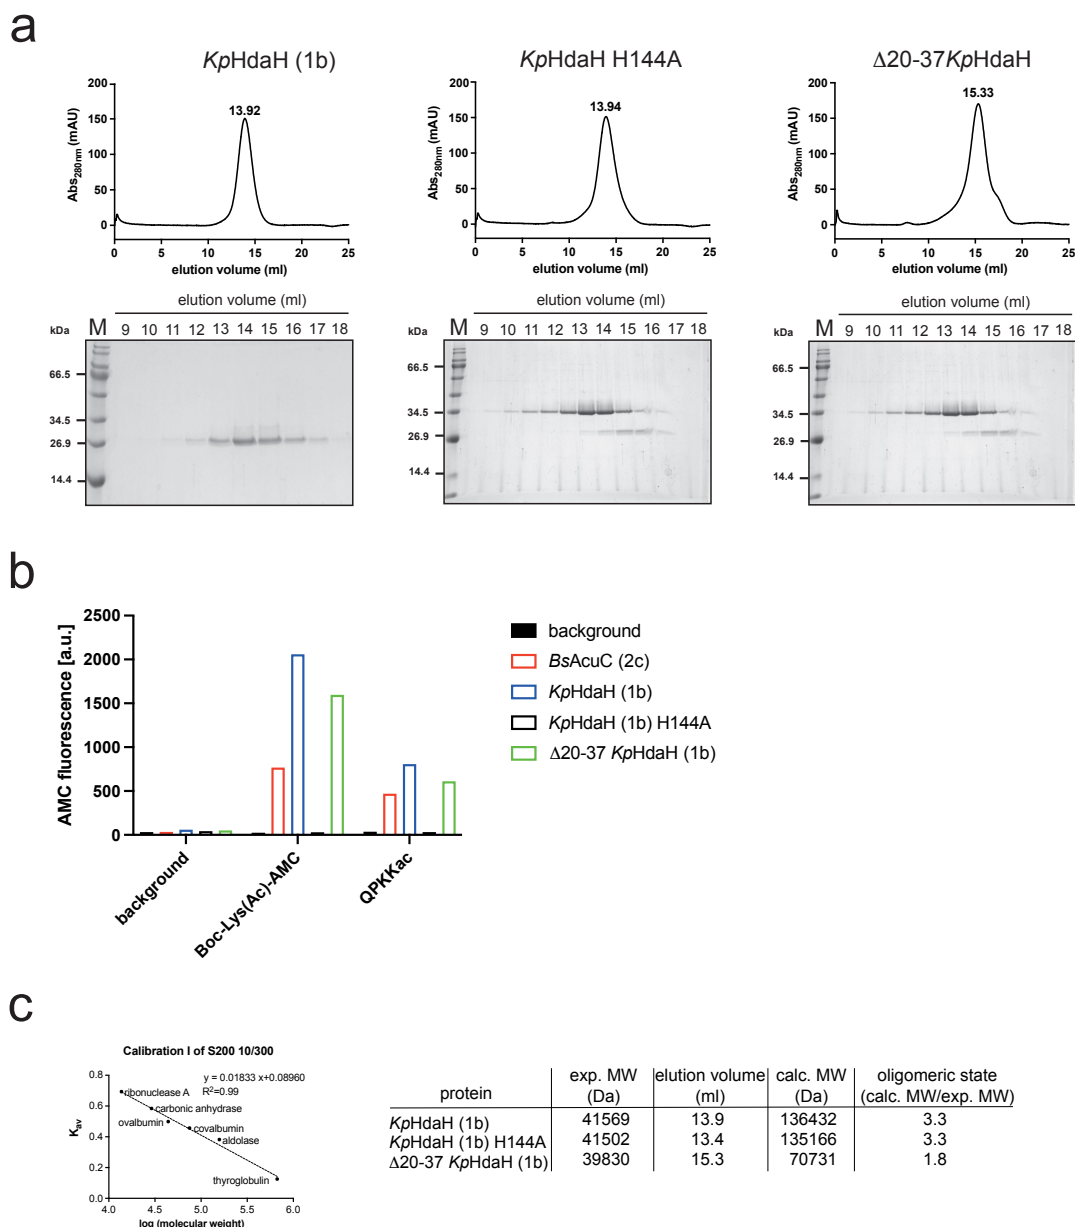

**Supplementary Figure 13: Analytical size exclusion chromatography of the L1-loop deleted mutant  $\Delta 20-37KpHdaH$  shows formation of a dimer and the  $\Delta 20-37KpHdaH$  (1b) is still catalytically active albeit with a lower activity compared to wildtype *KpHdaH* (1b).**

- a** The analytical SEC experiment on a calibrated S200 10/300 GL column reveals the deletion of the loop abolishes tetramer formation. Instead,  $\Delta 20-37KpHdaH$  (1b) elutes as an apparent dimer. Analyses of the crystal structure of *KpHdaH* (1b) and interface areas suggests the side-by-side dimer being abolished upon L1-loop deletion while the head-to-head dimer stays intact.
- b** A Fluor-de-Lys assay shows  $\Delta 20-37KpHdaH$  being active as lysine deacylase, however, the activity is reduced compared to wildtype *KpHdaH*. *BsAcuC* (2c) shows lower activity compared to  $\Delta 20-37KpHdaH$  and wildtype *KpHdaH*. The experiment was conducted in assay buffer (50 mM Tris/HCl, 137 mM NaCl, 2.7 mM KCl, 1 mM MgCl<sub>2</sub>, 0.5 mg/mL BSA, pH 8.0). The experiment was performed once ( $n=1$ ). Source data are provided as Source Data file.
- c** Evaluation of the oligomeric state of *KpHdaH* (1b) and  $\Delta 20-37KpHdaH$  as determined by analytical size exclusion chromatography. Source data are provided as Source Data file.

β1

1a\_Arabidopsis\_thaliana\_HDA14

|                               |           |            |                                                        |
|-------------------------------|-----------|------------|--------------------------------------------------------|
|                               | 1         |            | 10                                                     |
| 1a_Arabidopsis_thaliana_HDA14 | MSMALI... | VRP.....   | FFVP.....                                              |
| 1a_Candidatus_Hinthialibacter | MSFGLI... | VD.....    | SCF.....                                               |
| 1a_Actinobacteria_bacterium_R | MCESCGVRL | LLLY.....  |                                                        |
| 1b_Arabidopsis_thaliana_HDA8  | MVTNRV... | DV.....    | F.....                                                 |
| 1b_Klebsiella_pneumoniae_HdaH | MKRKTG... |            |                                                        |
| 1b_Vibrio_sp_vnigr-6D03_HdaH  | MSKRTG... |            |                                                        |
| 1c_Shinella_sp_DD12_HdaH      | MTTC....  | LF.E.....  |                                                        |
| 1c_Haematospirillum_jordaniae | MPT....   | LLV.S..... |                                                        |
| 1c_Micavibrio_sp_TMED2_Acu    | MSL.....  |            |                                                        |
| 1d_Legionella_londiniensis_Ap | MAI.....  |            | AFI.....                                               |
| 1d_Thioploca_ingrica_DAC      | MPIA....  | YF.H.....  |                                                        |
| 1d_Neisseria_zoodegmatis_DAC  | MNKIVR... | YMR.....   | L.....QLRRM.....LGRQ                                   |
| 1e_Stentor_coeruleus_HdaH     | MSKGIN... | EIE.....   | V.....DIHEICCL..GRHSDLEEILNS                           |
| 1e_Chlorella_variabilis_HdaH  | MSADGM... | SG.....    | GSES..EDE.GPS.....SFPLHDAQA..GDAELIHQ....              |
| 1e_Babesia_microti_strain_RI  | MASGSQ... | VGT.....   | CYR..KFO.P.....PLHKHILR..NDYDAIRYLSS                   |
| 1f_Pneumycystis_carinii_HdaH  | MANPNY... | SLN.....   | LSDSFYDE.TK.....EASYLTSHETDSL..LDA.....                |
| 1f_Malassezia_pachydermatis_H | MVFLVK... | LPARKPADGR | PPTNE..QES.....                                        |
| 1f_Saccharomyces_cerevisiae_H | MSSKHS... | D.....     | PLER.....                                              |
| 1g_Homo_sapiens_HDAC4         | MSSQ...   | SH.PD..... | GLSG..RDQ.PVELLNPARVNHMPSTVDVATALPLQVAPSAVPMDLRLDHO... |
| 1g_Saccharomyces_cerevisiae_H | MDSVMV... | K.....     | KEVL..EN.....                                          |
| 1g_Arabidopsis_thaliana_HDA5  | MAMAGE... | SS.....    | GKKI..GD CDGKV.....A.....GNRQ.....                     |

1a\_Arabidopsis\_thaliana\_HDA14

|                               |                                                                               |
|-------------------------------|-------------------------------------------------------------------------------|
| 1a_Arabidopsis_thaliana_HDA14 | .....                                                                         |
| 1a_Candidatus_Hinthialibacter | .....                                                                         |
| 1a_Actinobacteria_bacterium_R | .....                                                                         |
| 1b_Arabidopsis_thaliana_HDA8  | W..HEGMLR.....                                                                |
| 1b_Klebsiella_pneumoniae_HdaH | .....                                                                         |
| 1b_Vibrio_sp_vnigr-6D03_HdaH  | .....                                                                         |
| 1c_Shinella_sp_DD12_HdaH      | .....                                                                         |
| 1c_Haematospirillum_jordaniae | .....                                                                         |
| 1c_Micavibrio_sp_TMED2_Acu    | .....                                                                         |
| 1d_Legionella_londiniensis_Ap | T..HKDCLL.....                                                                |
| 1d_Thioploca_ingrica_DAC      | .....                                                                         |
| 1d_Neisseria_zoodegmatis_DAC  | A..RAAWIS.....                                                                |
| 1e_Stentor_coeruleus_HdaH     | IDFYADIMLERDEEGFIPYHLSLIYCRHKCVDL..ILS.....                                   |
| 1e_Chlorella_variabilis_HdaH  | .....LMTPPPDPAKPGPPSDDLVLGDDI.LARYVAEASAPQ.LPSINRRDHHE                        |
| 1e_Babesia_microti_strain_RI  | H..HRDCINDMDHdGRNAFHLLALQTANSKALYL..LLYYPFVHTNQVF..ATLDWTCDSDDEIDRDIHVHG..... |
| 1f_Pneumycystis_carinii_HdaH  | .....                                                                         |
| 1f_Malassezia_pachydermatis_H | .....                                                                         |
| 1f_Saccharomyces_cerevisiae_H | .....                                                                         |
| 1g_Homo_sapiens_HDAC4         | .....FSL..PVAEPALREQQLO..QEL.LALKKQKQIQRQILIAEFQRQHEQ                         |
| 1g_Saccharomyces_cerevisiae_H | .....                                                                         |
| 1g_Arabidopsis_thaliana_HDA5  | .....                                                                         |

1a\_Arabidopsis\_thaliana\_HDA14

|                               |                                                                       |
|-------------------------------|-----------------------------------------------------------------------|
| 1a_Arabidopsis_thaliana_HDA14 | ...GSA.....                                                           |
| 1a_Candidatus_Hinthialibacter | .....                                                                 |
| 1a_Actinobacteria_bacterium_R | .....                                                                 |
| 1b_Arabidopsis_thaliana_HDA8  | .....HDAVEGV.....                                                     |
| 1b_Klebsiella_pneumoniae_HdaH | .....                                                                 |
| 1b_Vibrio_sp_vnigr-6D03_HdaH  | .....                                                                 |
| 1c_Shinella_sp_DD12_HdaH      | .....                                                                 |
| 1c_Haematospirillum_jordaniae | .....                                                                 |
| 1c_Micavibrio_sp_TMED2_Acu    | .....                                                                 |
| 1d_Legionella_londiniensis_Ap | .....HNT.....                                                         |
| 1d_Thioploca_ingrica_DAC      | .....HPL.....                                                         |
| 1d_Neisseria_zoodegmatis_DAC  | .....                                                                 |
| 1e_Stentor_coeruleus_HdaH     | .....                                                                 |
| 1e_Chlorella_variabilis_HdaH  | CTPLHVALLHGQLE.....AARA.....LLEHGA.....                               |
| 1e_Babesia_microti_strain_RI  | .....NAKPAYQAGDRILMKWNETPDLYKKAAFSALEGYSIRGCGLRIVEDLYEQHYKYLDPKN..... |
| 1f_Pneumycystis_carinii_HdaH  | .....ILNISL.....KDEETK.....                                           |
| 1f_Malassezia_pachydermatis_H | .....                                                                 |
| 1f_Saccharomyces_cerevisiae_H | .....QQQEMLAMKHQELLEHOR.....                                          |
| 1g_Homo_sapiens_HDAC4         | LSRQHEAQLHEHIK.....P.....DHDLLKR.....                                 |
| 1g_Saccharomyces_cerevisiae_H | .....                                                                 |
| 1g_Arabidopsis_thaliana_HDA5  | ...RKV.....                                                           |



1a\_Arabidopsis\_thaliana\_HDA14

1a\_Arabidopsis\_thaliana\_HDA14  
1a\_Candidatus\_Hinthialibacter  
1a\_Actinobacteria\_bacterium\_R  
1b\_Arabidopsis\_thaliana\_HDA8  
1b\_Klebsiella\_pneumoniae\_HdaH  
1b\_Vibrio\_sp\_vnigr-6D03\_HdaH  
1c\_Shinella\_sp\_DD12\_HdaH  
1c\_Haematospirillum\_jordaniae  
1c\_Micavibrio\_sp\_TMED2\_Acu  
1d\_Legionella\_londiniensis\_Ap  
1d\_Thioploca\_ingrica\_DAC  
1d\_Neisseria\_zoodegmatis\_DAC  
1e\_Stentor\_coeruleus\_HdaH  
1e\_Chlorella\_variabilis\_HdaH  
1e\_Babesia\_microti\_strain\_RI  
1f\_Pneumycystis\_carinii\_HdaH  
1f\_Malassezia\_pachydermatis\_H  
1f\_Saccharomyces\_cerevisiae\_H  
1g\_Homo\_sapiens\_HDAC4  
1g\_Saccharomyces\_cerevisiae\_H  
1g\_Arabidopsis\_thaliana\_HDA5

SLE.....TAKYARLYSKEINFPEKIETID..ELKEKNYISTIITSEIVMEKDD...NTRVSFASDFI  
TLERSAREY.....  
KLSDAVDEQ.....  
.VP.....  
KLERHRQEQELEKQHREKQ.....LQQLKNKEKESAVASTEVKMKLQEFVNLNKKKALAHRNL  
KLEENKEE.....NSLSTTSKSRQVIV.....

1a\_Arabidopsis\_thaliana\_HDA14

20

1a\_Arabidopsis\_thaliana\_HDA14  
1a\_Candidatus\_Hinthialibacter  
1a\_Actinobacteria\_bacterium\_R  
1b\_Arabidopsis\_thaliana\_HDA8  
1b\_Klebsiella\_pneumoniae\_HdaH  
1b\_Vibrio\_sp\_vnigr-6D03\_HdaH  
1c\_Shinella\_sp\_DD12\_HdaH  
1c\_Haematospirillum\_jordaniae  
1c\_Micavibrio\_sp\_TMED2\_Acu  
1d\_Legionella\_londiniensis\_Ap  
1d\_Thioploca\_ingrica\_DAC  
1d\_Neisseria\_zoodegmatis\_DAC  
1e\_Stentor\_coeruleus\_HdaH  
1e\_Chlorella\_variabilis\_HdaH  
1e\_Babesia\_microti\_strain\_RI  
1f\_Pneumycystis\_carinii\_HdaH  
1f\_Malassezia\_pachydermatis\_H  
1f\_Saccharomyces\_cerevisiae\_H  
1g\_Homo\_sapiens\_HDAC4  
1g\_Saccharomyces\_cerevisiae\_H  
1g\_Arabidopsis\_thaliana\_HDA5

GISGSRNICKK  
SI  
LSIDFQVPYQGFMPHILAMACAG.....  
LGCEGSPLHVAVCVAAHGAMQEFALAAMALLLQFGADPYERNNGRTAL.....H...  
DSCDNFELQPIPLETVDLLVSFDMTSPHLLFSNIY.....  
SGVHAVRPVTIVPATAASTTTETPAH.....  
NHCISSDPR..YWYGKTKHSSLDQSSPPQSGV.....  
GL

1a\_Arabidopsis\_thaliana\_HDA14

30

1a\_Arabidopsis\_thaliana\_HDA14  
1a\_Candidatus\_Hinthialibacter  
1a\_Actinobacteria\_bacterium\_R  
1b\_Arabidopsis\_thaliana\_HDA8  
1b\_Klebsiella\_pneumoniae\_HdaH  
1b\_Vibrio\_sp\_vnigr-6D03\_HdaH  
1c\_Shinella\_sp\_DD12\_HdaH  
1c\_Haematospirillum\_jordaniae  
1c\_Micavibrio\_sp\_TMED2\_Acu  
1d\_Legionella\_londiniensis\_Ap  
1d\_Thioploca\_ingrica\_DAC  
1d\_Neisseria\_zoodegmatis\_DAC  
1e\_Stentor\_coeruleus\_HdaH  
1e\_Chlorella\_variabilis\_HdaH  
1e\_Babesia\_microti\_strain\_RI  
1f\_Pneumycystis\_carinii\_HdaH  
1f\_Malassezia\_pachydermatis\_H  
1f\_Saccharomyces\_cerevisiae\_H  
1g\_Homo\_sapiens\_HDAC4  
1g\_Saccharomyces\_cerevisiae\_H  
1g\_Arabidopsis\_thaliana\_HDA5

NQWRKYL.....  
FTH.....  
WAA.....QMDFSAAAEAVLA.....FPECHEDLIQTVNCL...LK.....AAE  
IESYREKILDCLKILITFFRVFDHKE...TVDSVKCMHLKNI.....  
MMPAAEDTDGAAFQEAVPA.....PAL  
FYK.....STSYNHPVL.....GMYD.....AKDDFPLRKTAS  
PV.....CMPKI  
IYD.....

1a\_Arabidopsis\_thaliana\_HDA14

1a\_Arabidopsis\_thaliana\_HDA14
1a\_Candidatus\_Hinthialibacter
1a\_Actinobacteria\_bacterium\_R
1b\_Arabidopsis\_thaliana\_HDA8
1b\_Klebsiella\_pneumoniae\_HdaH
1b\_Vibrio\_sp\_vnigr-6D03\_HdaH
1c\_Shinella\_sp\_DD12\_HdaH
1c\_Haematospirillum\_jordaniae
1c\_Micavibrio\_sp\_TMED2\_Acu
1d\_Legionella\_londiniensis\_Ap
1d\_Thioploca\_ingrica\_DAC
1d\_Neisseria\_zoodegmatis\_DAC
1e\_Stentor\_coeruleus\_HdaH
1e\_Chlorella\_variabilis\_HdaH
1e\_Babesia\_microti\_strain\_RI
1f\_Pneumycystis\_carinii\_HdaH
1f\_Malassezia\_pachydermatis\_H
1f\_Saccharomyces\_cerevisiae\_H
1g\_Homo\_sapiens\_HDAC4
1g\_Saccharomyces\_cerevisiae\_H
1g\_Arabidopsis\_thaliana\_HDA5

1a\_Arabidopsis\_thaliana\_HDA14

1a\_Arabidopsis\_thaliana\_HDA14
1a\_Candidatus\_Hinthialibacter
1a\_Actinobacteria\_bacterium\_R
1b\_Arabidopsis\_thaliana\_HDA8
1b\_Klebsiella\_pneumoniae\_HdaH
1b\_Vibrio\_sp\_vnigr-6D03\_HdaH
1c\_Shinella\_sp\_DD12\_HdaH
1c\_Haematospirillum\_jordaniae
1c\_Micavibrio\_sp\_TMED2\_Acu
1d\_Legionella\_londiniensis\_Ap
1d\_Thioploca\_ingrica\_DAC
1d\_Neisseria\_zoodegmatis\_DAC
1e\_Stentor\_coeruleus\_HdaH
1e\_Chlorella\_variabilis\_HdaH
1e\_Babesia\_microti\_strain\_RI
1f\_Pneumycystis\_carinii\_HdaH
1f\_Malassezia\_pachydermatis\_H
1f\_Saccharomyces\_cerevisiae\_H
1g\_Homo\_sapiens\_HDAC4
1g\_Saccharomyces\_cerevisiae\_H
1g\_Arabidopsis\_thaliana\_HDA5

1a\_Arabidopsis\_thaliana\_HDA14

1a\_Arabidopsis\_thaliana\_HDA14
1a\_Candidatus\_Hinthialibacter
1a\_Actinobacteria\_bacterium\_R
1b\_Arabidopsis\_thaliana\_HDA8
1b\_Klebsiella\_pneumoniae\_HdaH
1b\_Vibrio\_sp\_vnigr-6D03\_HdaH
1c\_Shinella\_sp\_DD12\_HdaH
1c\_Haematospirillum\_jordaniae
1c\_Micavibrio\_sp\_TMED2\_Acu
1d\_Legionella\_londiniensis\_Ap
1d\_Thioploca\_ingrica\_DAC
1d\_Neisseria\_zoodegmatis\_DAC
1e\_Stentor\_coeruleus\_HdaH
1e\_Chlorella\_variabilis\_HdaH
1e\_Babesia\_microti\_strain\_RI
1f\_Pneumycystis\_carinii\_HdaH
1f\_Malassezia\_pachydermatis\_H
1f\_Saccharomyces\_cerevisiae\_H
1g\_Homo\_sapiens\_HDAC4
1g\_Saccharomyces\_cerevisiae\_H
1g\_Arabidopsis\_thaliana\_HDA5

1a\_Arabidopsis\_thaliana\_HDA14

1a\_Arabidopsis\_thaliana\_HDA14 .....  
1a\_Candidatus\_Hinthialibacter .....  
1a\_Actinobacteria\_bacterium\_R .....  
1b\_Arabidopsis\_thaliana\_HDA8 ..... DVLEK .....  
1b\_Klebsiella\_pneumoniae\_HdaH .....  
1b\_Vibrio\_sp\_vnigr-6D03\_HdaH .....  
1c\_Shinella\_sp\_DD12\_HdaH .....  
1c\_Haematospirillum\_jordaniae .....  
1c\_Micavibrio\_sp\_TMED2\_Acu .....  
1d\_Legionella\_londiniensis\_Ap .....  
1d\_Thioploca\_ingrica\_DAC .....  
1d\_Neisseria\_zoodegmatidis\_DAC .....  
1e\_Stentor\_coeruleus\_HdaH FFCTDN ..... R  
1e\_Chlorella\_variabilis\_HdaH CRTRSKA .....  
1e\_Babesia\_microti\_strain\_RI LTCDNNSKVRDGSRAEMDYLNNSQKDKIFNNKLILKEDHTFLKQVPGEVIFERLFSKYGECFITTISSELLLF  
1f\_Pneumycystis\_carinii\_HdaH .....  
1f\_Malassezia\_pachydermatis\_H .....  
1f\_Saccharomyces\_cerevisiae\_H .....  
1g\_Homo\_sapiens\_HDAC4 APLVTGL .....  
1g\_Saccharomyces\_cerevisiae\_H .....  
1g\_Arabidopsis\_thaliana\_HDA5 .....

1a\_Arabidopsis\_thaliana\_HDA14

1a\_Arabidopsis\_thaliana\_HDA14 .....  
1a\_Candidatus\_Hinthialibacter .....  
1a\_Actinobacteria\_bacterium\_R .....  
1b\_Arabidopsis\_thaliana\_HDA8 .....  
1b\_Klebsiella\_pneumoniae\_HdaH .....  
1b\_Vibrio\_sp\_vnigr-6D03\_HdaH .....  
1c\_Shinella\_sp\_DD12\_HdaH .....  
1c\_Haematospirillum\_jordaniae .....  
1c\_Micavibrio\_sp\_TMED2\_Acu .....  
1d\_Legionella\_londiniensis\_Ap .....  
1d\_Thioploca\_ingrica\_DAC .....  
1d\_Neisseria\_zoodegmatidis\_DAC .....  
1e\_Stentor\_coeruleus\_HdaH GDKPIHTSVRAGSWEFCNILITF ..... GSEMLNENNEF  
1e\_Chlorella\_variabilis\_HdaH GHNALHLAALAGSSRCAALLAAA ..... AL  
1e\_Babesia\_microti\_strain\_RI FEQLFYRCIHRNSWRVFLALASFNNLTTFHMFSSPLCVHRFKFAHSMGNVYAFFSILNYSVRLLYPNETKCVENMDF  
1f\_Pneumycystis\_carinii\_HdaH .....  
1f\_Malassezia\_pachydermatis\_H .....  
1f\_Saccharomyces\_cerevisiae\_H .....  
1g\_Homo\_sapiens\_HDAC4 GALPLHAQSLVGADRVSPSIHKL ..... RQ  
1g\_Saccharomyces\_cerevisiae\_H .....  
1g\_Arabidopsis\_thaliana\_HDA5 .....

1a\_Arabidopsis\_thaliana\_HDA14

1a\_Arabidopsis\_thaliana\_HDA14 .....  
1a\_Candidatus\_Hinthialibacter .....  
1a\_Actinobacteria\_bacterium\_R .....  
1b\_Arabidopsis\_thaliana\_HDA8 .....  
1b\_Klebsiella\_pneumoniae\_HdaH .....  
1b\_Vibrio\_sp\_vnigr-6D03\_HdaH .....  
1c\_Shinella\_sp\_DD12\_HdaH .....  
1c\_Haematospirillum\_jordaniae .....  
1c\_Micavibrio\_sp\_TMED2\_Acu .....  
1d\_Legionella\_londiniensis\_Ap .....  
1d\_Thioploca\_ingrica\_DAC .....  
1d\_Neisseria\_zoodegmatidis\_DAC .....  
1e\_Stentor\_coeruleus\_HdaH E ..... ETP ..... EEVA .....  
1e\_Chlorella\_variabilis\_HdaH ..... DAAAGKSKLGLTP ..... ADLAAR .....  
1e\_Babesia\_microti\_strain\_RI ELGDMSMTFNRRNVKVEKGQDKITPAP ..... TNFAQY .....  
1f\_Pneumycystis\_carinii\_HdaH .....  
1f\_Malassezia\_pachydermatis\_H .....  
1f\_Saccharomyces\_cerevisiae\_H .....  
1g\_Homo\_sapiens\_HDAC4 ..... HRP LGR TQSAPLPQNAQA I QHLVIQQHQHFLEKHKQFQQQLQMNKIIPKPSEPARQFESH P  
1g\_Saccharomyces\_cerevisiae\_H .....  
1g\_Arabidopsis\_thaliana\_HDA5 .....

1a\_Arabidopsis\_thaliana\_HDA14

1a\_Arabidopsis\_thaliana\_HDA14 .....
1a\_Candidatus\_Hinthialibacter .....
1a\_Actinobacteria\_bacterium\_R .....
1b\_Arabidopsis\_thaliana\_HDA8 .....
1b\_Klebsiella\_pneumoniae\_HdaH .....
1b\_Vibrio\_sp\_vnigr-6D03\_HdaH .....
1c\_Shinella\_sp\_DD12\_HdaH .....
1c\_Haematospirillum\_jordaniae .....
1c\_Micavibrio\_sp\_TMED2\_Acu .....
1d\_Legionella\_londiniensis\_Ap .....
1d\_Thioploca\_ingrica\_DAC .....
1d\_Neisseria\_zoodegmatis\_DAC .....
1e\_Stentor\_coeruleus\_HdaH .....
1e\_Chlorella\_variabilis\_HdaH .....
1e\_Babesia\_microti\_strain\_RI .....
1f\_Pneumycystis\_carinii\_HdaH .....
1f\_Malassezia\_pachydermatis\_H .....
1f\_Saccharomyces\_cerevisiae\_H .....
1g\_Homo\_sapiens\_HDAC4 .....
1g\_Saccharomyces\_cerevisiae\_H .....
1g\_Arabidopsis\_thaliana\_HDA5 .....

1a\_Arabidopsis\_thaliana\_HDA14

1a\_Arabidopsis\_thaliana\_HDA14 .....
1a\_Candidatus\_Hinthialibacter .....
1a\_Actinobacteria\_bacterium\_R .....
1b\_Arabidopsis\_thaliana\_HDA8 .....
1b\_Klebsiella\_pneumoniae\_HdaH .....
1b\_Vibrio\_sp\_vnigr-6D03\_HdaH .....
1c\_Shinella\_sp\_DD12\_HdaH .....
1c\_Haematospirillum\_jordaniae .....
1c\_Micavibrio\_sp\_TMED2\_Acu .....
1d\_Legionella\_londiniensis\_Ap .....
1d\_Thioploca\_ingrica\_DAC .....
1d\_Neisseria\_zoodegmatis\_DAC .....
1e\_Stentor\_coeruleus\_HdaH .....
1e\_Chlorella\_variabilis\_HdaH .....
1e\_Babesia\_microti\_strain\_RI .....
1f\_Pneumycystis\_carinii\_HdaH .....
1f\_Malassezia\_pachydermatis\_H .....
1f\_Saccharomyces\_cerevisiae\_H .....
1g\_Homo\_sapiens\_HDAC4 .....
1g\_Saccharomyces\_cerevisiae\_H .....
1g\_Arabidopsis\_thaliana\_HDA5 .....

1a\_Arabidopsis\_thaliana\_HDA14

1a\_Arabidopsis\_thaliana\_HDA14 .....
1a\_Candidatus\_Hinthialibacter .....
1a\_Actinobacteria\_bacterium\_R .....
1b\_Arabidopsis\_thaliana\_HDA8 .....
1b\_Klebsiella\_pneumoniae\_HdaH .....
1b\_Vibrio\_sp\_vnigr-6D03\_HdaH .....
1c\_Shinella\_sp\_DD12\_HdaH .....
1c\_Haematospirillum\_jordaniae .....
1c\_Micavibrio\_sp\_TMED2\_Acu .....
1d\_Legionella\_londiniensis\_Ap .....
1d\_Thioploca\_ingrica\_DAC .....
1d\_Neisseria\_zoodegmatis\_DAC .....
1e\_Stentor\_coeruleus\_HdaH .....
1e\_Chlorella\_variabilis\_HdaH .....
1e\_Babesia\_microti\_strain\_RI .....
1f\_Pneumycystis\_carinii\_HdaH .....
1f\_Malassezia\_pachydermatis\_H .....
1f\_Saccharomyces\_cerevisiae\_H .....
1g\_Homo\_sapiens\_HDAC4 .....
1g\_Saccharomyces\_cerevisiae\_H .....
1g\_Arabidopsis\_thaliana\_HDA5 .....

$\alpha 1$   $\beta 2$   $\alpha 2$   
 1a\_Arabidopsis\_thaliana\_HDA14 ..... 00  $\xrightarrow{70}$  TT 80 000000 90  $\xrightarrow{100}$  ..... 00 ..... 00

1a\_Arabidopsis\_thaliana\_HDA14 ..... ADARLIYSVSAALGHNKES...HP**E**CSA**R**VPAIVN...AL...EM..N.....E..LT.  
 1a\_Candidatus\_Hinthialibacter ..... G.....R.....HP**E**RP**E**RLDSIDS...AF...KE..H.....  
 1a\_Actinobacteria\_bacterium\_R ..... TG.....G.....W...HP**E**RAA**R**LDAAIE...GA...RR...S...S..L.  
 1b\_Arabidopsis\_thaliana\_HDA8 ..... HPENADRVRN...ML.SILRR.GP.....I.  
 1b\_Klebsiella\_pneumoniae\_HdaH LPVGGWVQP...PAGG...G...HA**E**SP**E**TKRRMKK...LM...DV...S...G..L.  
 1b\_Vibrio\_sp\_vnigr-6D03\_HdaH LPVGDWVQP...MSAG...G...HA**E**SP**E**TKRRLKN...LL...DA...S...G..I..  
 1c\_Shinella\_sp\_DD12\_HdaH ..... P.....E.....G...HP**E**RS**D**RIRAINL...AL...EH..E...R..F.  
 1c\_Haematospirillum\_jordaniae ..... TG.....G.....Y...HP**E**NP**D**RLRSVL...QT...LE..S...E..D.  
 1c\_Micavibrio\_sp\_TMED2\_Acu ..... P.....G.....G...HP**E**RI...DR...L...V...S...V..L.  
 1d\_Legionella\_londiniensis\_Ap ..... D.....D.....F...HP**E**CP**E**RLQVIND...NL...SQ.SA...S...I.  
 1d\_Thioploca\_ingrica\_DAC ..... MG.....K.....G...HP**E**RS**R**INAIED...QL...QA...S...R..L.  
 1d\_Neisseria\_zoodegmatis\_DAC ..... N.....K.....G...HP**E**SA**E**RIKAIEA...EI...A...G...QGF  
 1e\_Stentor\_coeruleus\_HdaH TPQTLTKQI...N.....I...QP**E**NR**R**LEILVD...LPFGALLT.SD.....L.  
 1e\_Chlorella\_variabilis\_HdaH APITRETS...S.....A...PP**E**N**V**E**R**LTIVLTKPGWGIL...RC..D...E..F.  
 1e\_Babesia\_microti\_strain\_RI MPQRRKKMT...S.....N...F**V**EN**P**T**R**LEVIIS...NDNAILRT.DI...L.  
 1f\_Pneumocystis\_carinii\_HdaH ..... ERNK...HDLK...Y...I**V**ER**P**RYRAII...GT...LSAKAHLDDLK...S.  
 1f\_Malassezia\_pachydermatis\_H ..... RG...VDKS...N...I**V**ER**P**ERIRAVLL...GI...A...G...VQGM  
 1g\_Saccharomyces\_cerevisiae\_H ..... PREWVTKSYRK...T...I**V**ER**P**ERLLASSM...GI...SA...AITM.  
 1g\_Homo\_sapiens\_HDAC4 ..... TCGSS...S.....S...HP**E**HAG**R**IQSIWS...RL...QE..T...G..L.  
 1g\_Saccharomyces\_cerevisiae\_H ..... I.....FTSY.....FEYIDP**H**EP**D**PR**I**YRIYK...IL...AE..N...G..L.  
 1g\_Arabidopsis\_thaliana\_HDA5 ..... D.....GED...HP**E**CP**D**RI.RVI...W...EK..L...Q..LA

$\alpha 3$   $\eta 1$   $\beta 3$   
 1a\_Arabidopsis\_thaliana\_HDA14 ..... 00000 ..... 00  $\xrightarrow{110}$

1a\_Arabidopsis\_thaliana\_HDA14 ..... PKFRG.....SQ.I...LELA.  
 1a\_Candidatus\_Hinthialibacter ..... K.I.....LE.SC.HCLSFEP.  
 1a\_Actinobacteria\_bacterium\_R ..... EV.....AD.R...EAP.  
 1b\_Arabidopsis\_thaliana\_HDA8 A.....PHV.....NWF...T.G.  
 1b\_Klebsiella\_pneumoniae\_HdaH ..... P.Q.L.....AL.R...S.A.  
 1b\_Vibrio\_sp\_vnigr-6D03\_HdaH ..... T.....K.H.L.....TL.S...S.A.  
 1c\_Shinella\_sp\_DD12\_HdaH ..... S.....P.L.L.....R.E...K.A.  
 1c\_Haematospirillum\_jordaniae ..... F.....F.ML.....HR.E...E.A.  
 1c\_Micavibrio\_sp\_TMED2\_Acu ..... A.....A...L.....EE.E...PFNAC  
 1d\_Legionella\_londiniensis\_Ap QS.....SLV.....W.E...T.A.  
 1d\_Thioploca\_ingrica\_DAC ..... L.....E..LV.....RY.Y...E.A.  
 1d\_Neisseria\_zoodegmatis\_DAC W.....DVF.....QKIE...A.A.  
 1e\_Stentor\_coeruleus\_HdaH S.....FAT.....WKK...S.S.  
 1e\_Chlorella\_variabilis\_HdaH ..... G.....G..AL.....RWDE...RS.  
 1e\_Babesia\_microti\_strain\_RI E.....GVY.....ILO...S.P.  
 1f\_Pneumocystis\_carinii\_HdaH ..... N.....SFD..IY.....QSVR...Y.I.  
 1f\_Pneumocystis\_carinii\_HdaH ..... G.....E.K.LAATKPKSDDDDVAAMLGMSIAERESVLRVFTTTRTLRLSEPSVALADVHA.H...E.S.  
 1f\_Malassezia\_pachydermatis\_H ..... Y.....P.S.LF.....TL.K...S.  
 1g\_Homo\_sapiens\_HDAC4 ..... R.....G..KC.....EC.I...R.G.  
 1g\_Saccharomyces\_cerevisiae\_H ..... INDPTLSGVDDLGD...LM...LK.I...P.V.  
 1g\_Arabidopsis\_thaliana\_HDA5 GV.....S.QRC.....VV.L...GS.

$\alpha 4$   
 1a\_Arabidopsis\_thaliana\_HDA14 ..... 00 ..... 00  
 120

1a\_Arabidopsis\_thaliana\_HDA14 ...NFKT**A**T.VE.....DIAN**V**H**D**KA  
 1a\_Candidatus\_Hinthialibacter ..... AE**E**E.....FL**E**K**V**HR..  
 1a\_Actinobacteria\_bacterium\_R ..... EA.P.LE.....AL**Y**L**V**HR**P**A  
 1b\_Arabidopsis\_thaliana\_HDA8 ..... LP**A**I.VS.....ELL**M**F**T**SE  
 1b\_Klebsiella\_pneumoniae\_HdaH ..... AP**A**S.LE.....DL**R**R**I**HP**D**S  
 1b\_Vibrio\_sp\_vnigr-6D03\_HdaH ..... PS**C**S.QA.....QL**L**R**V**HP**E**H  
 1c\_Shinella\_sp\_DD12\_HdaH ..... PQ**A**N.ED.....FV**L**L**A**HP**E**R  
 1c\_Haematospirillum\_jordaniae ..... PR**A**T.LE.....QL**T**R**V**HP**Q**S  
 1c\_Micavibrio\_sp\_TMED2\_Acu PR**G**P**V**PK**A**S.RE.....QL**E**R**V**HP**E**V  
 1d\_Legionella\_londiniensis\_Ap ..... HK**A**T.RA.....QL**E**R**V**HP**D**K**Q**  
 1d\_Thioploca\_ingrica\_DAC ..... PL**A**T.RA.....QL**T**R**V**HP**D**SE  
 1d\_Neisseria\_zoodegmatis\_DAC ..... EV**S**DS**Q**L.....AL...I**H**PR**K**  
 1e\_Stentor\_coeruleus\_HdaH ..... NP**A**H.IS.....DIL**R**V**H**E**Y**S  
 1e\_Chlorella\_variabilis\_HdaH ..... QR**A**A.IG.....DVL**R**V**H**D**W**N  
 1e\_Babesia\_microti\_strain\_RI ..... PP**A**C.LA.....DIL**R**V**H**D**I**G  
 1f\_Pneumocystis\_carinii\_HdaH ..... SI**I**N.NP.....IIE**F**I**H**GE**K**  
 1f\_Malassezia\_pachydermatis\_H ..... EP**A**T.YDLTTAYAPTSAATETASAKHCERISQLAAKAPSHPPGDVPRYSSLDGALSASSDGDGEGDERM**H**ESE  
 1f\_Saccharomyces\_cerevisiae\_H SH**Q**R**K**GS**L**M.AP.....HVL**K**V**H**GS**S**  
 1g\_Homo\_sapiens\_HDAC4 ..... RK**A**T.LE.....EL**Q**T**V**H**S**E**A**  
 1g\_Saccharomyces\_cerevisiae\_H ..... RA**A**T.SE.....EIL**E**V**H**T**K**E  
 1g\_Arabidopsis\_thaliana\_HDA5 ..... SK**A**E.DK.....HL**Q**L**V**H**T**K**D**









α13  
0000000000.0000  
410 420

1a\_Arabidopsis\_thaliana\_HDA14 ..... PMRKVRDAIQRA.KSIHCL.....

1a\_Candidatus\_Hinthialibacter ..... SPPRARH.MVQVSLAQAAKYWDV.....G.....

1a\_Actinobacteria\_bacterium\_R ..... RA..TFA.QFQR.QA.....

1b\_Arabidopsis\_thaliana\_HDA8 ..... CQ..SFN.QLQA.EK.....

1b\_Klebsiella\_pneumoniae\_HdaH ..... LMEN.....

1b\_Vibrio\_sp\_vnigr-6D03\_HdaH ..... HEKKVRA.ELEA.KKAEAAHQKA.....

1c\_Shinella\_sp\_DD12\_HdaH ..... KNL.MDSI.SVLE.GILR.....

1c\_Haematospirillum\_jordaniae ..... IDKSI.....

1c\_Micavibrio\_sp\_TMED2\_Acu ..... NL..MQL.ERMA.KR...VM.A...EA.....

1d\_Legionella\_londiniensis\_Ap ..... Y.KTKRA.KDVI..RIWAEVIRL.....GRAMI.....

1d\_Thioploca\_ingrica\_DAC ..... NANAVRS.MEKV.MEIHSHKYWRC.....LQ.....

1d\_Neisseria\_zoodegmatidis\_DAC ..... IDKVIRLQSKYWNCFRRRHANSNGCNFNPEIND.SIIS.KNFPLQKAIR.....QQ.....QQHYLSD.....

1e\_Stentor\_coeruleus\_HdaH ..... FESTWRV.IQAV.RKRLCTYWPSLADELSWKLINQKTPPIILISS...DSE

1e\_Chlorella\_variabilis\_HdaH

1e\_Babesia\_microti\_strain\_RI

1f\_Pneumycystis\_carinii\_HdaH

1f\_Malassezia\_pachydermatis\_H

1f\_Saccharomyces\_cerevisiae\_H

1g\_Homo\_sapiens\_HDAC4

1g\_Saccharomyces\_cerevisiae\_H

1g\_Arabidopsis\_thaliana\_HDA5

1a\_Arabidopsis\_thaliana\_HDA14

1a\_Candidatus\_Hinthialibacter

1a\_Actinobacteria\_bacterium\_R

1b\_Arabidopsis\_thaliana\_HDA8

1b\_Klebsiella\_pneumoniae\_HdaH

1b\_Vibrio\_sp\_vnigr-6D03\_HdaH

1c\_Shinella\_sp\_DD12\_HdaH

1c\_Haematospirillum\_jordaniae

1c\_Micavibrio\_sp\_TMED2\_Acu

1d\_Legionella\_londiniensis\_Ap

1d\_Thioploca\_ingrica\_DAC

1d\_Neisseria\_zoodegmatidis\_DAC ..... FL

1e\_Stentor\_coeruleus\_HdaH ..... NEK...MILKSSVNESFRALKRNRKMYIE.N...NEK...LEV

1e\_Chlorella\_variabilis\_HdaH

1e\_Babesia\_microti\_strain\_RI ..... CDK...GIVEKANFD...LPSSHLY.S...MD.

1f\_Pneumycystis\_carinii\_HdaH ..... SKGTISR...LPKNALL.N...IQI

1f\_Malassezia\_pachydermatis\_H ..... AA...HAT

1f\_Saccharomyces\_cerevisiae\_H ..... PEFDD...IIFKDAVNS...APSNSLL.K...ATV

1g\_Homo\_sapiens\_HDAC4

1g\_Saccharomyces\_cerevisiae\_H ..... EFNF...VTLPVLSMD...LPDNTVL.CTPNISESNTIIIVVHDTSDIWAQRNVISGTDLSSSVIIDNSL

1g\_Arabidopsis\_thaliana\_HDA5 ..... TEDNAQGLLDQMSKLSIEN...PQGTLLN...HQV

1a\_Arabidopsis\_thaliana\_HDA14

1a\_Candidatus\_Hinthialibacter

1a\_Actinobacteria\_bacterium\_R ..... E.ANAVAAVES.IKTYHTEFVPLRGT.....

1b\_Arabidopsis\_thaliana\_HDA8 ..... I.....

1b\_Klebsiella\_pneumoniae\_HdaH ..... I.....

1b\_Vibrio\_sp\_vnigr-6D03\_HdaH

1c\_Shinella\_sp\_DD12\_HdaH

1c\_Haematospirillum\_jordaniae

1c\_Micavibrio\_sp\_TMED2\_Acu

1d\_Legionella\_londiniensis\_Ap

1d\_Thioploca\_ingrica\_DAC

1d\_Neisseria\_zoodegmatidis\_DAC ..... KSEHA.....

1e\_Stentor\_coeruleus\_HdaH ..... SMENQLTAEVAE.....EFNGEK...TQEVVSEESGGDEDQDENSEDESGN.....

1e\_Chlorella\_variabilis\_HdaH ..... AA.....REAYVK.....ARLAA...VAA.AAA.....

1e\_Babesia\_microti\_strain\_RI ..... DMTNQIS.ELVE.....SIYSKKCCISHILRSEDR.VDTINSEYNPFYSGNAWYSFFCHTFQPIECD.....

1f\_Pneumycystis\_carinii\_HdaH ..... DWI.....KN.IIQMAQ.....KYTTI...L.....

1f\_Malassezia\_pachydermatis\_H ..... QTA.....SATRPRRTTQYQ...P.WIIRAS...EYFAA...FQQ.ACG.....

1f\_Saccharomyces\_cerevisiae\_H ..... EPA.....ST...STI...A.Q.....

1g\_Homo\_sapiens\_HDAC4 ..... RTTSTA.....GRSLI...EAQ.TCE.....

1g\_Saccharomyces\_cerevisiae\_H ..... DFI.....KW.G...LDR...KYGI...I.....

1g\_Arabidopsis\_thaliana\_HDA5 ..... EPA.....ST...SWR...A.DLAKVD...VWYAS...FGS.NMWKPRFLCYIQ

1a\_Arabidopsis\_thaliana\_HDA14

1a\_Arabidopsis\_thaliana\_HDA14
1a\_Candidatus\_Hinthialibacter
1a\_Actinobacteria\_bacterium\_R
1b\_Arabidopsis\_thaliana\_HDA8
1b\_Klebsiella\_pneumoniae\_HdaH
1b\_Vibrio\_sp\_vnigr-6D03\_HdaH
1c\_Shinella\_sp\_DD12\_HdaH
1c\_Haematospirillum\_jordaniae
1c\_Micavibrio\_sp\_TMED2\_Acu
1d\_Legionella\_londiniensis\_Ap
1d\_Thioploca\_ingrica\_DAC
1d\_Neisseria\_zoodegmatis\_DAC
1e\_Stentor\_coeruleus\_HdaH
1e\_Chlorella\_variabilis\_HdaH
1e\_Babesia\_microti\_strain\_RI
1f\_Pneumycystis\_carinii\_HdaH
1f\_Malassezia\_pachydermatis\_H
1f\_Saccharomyces\_cerevisiae\_H
1g\_Homo\_sapiens\_HDAC4
1g\_Saccharomyces\_cerevisiae\_H
1g\_Arabidopsis\_thaliana\_HDA5

1a\_Arabidopsis\_thaliana\_HDA14

1a\_Arabidopsis\_thaliana\_HDA14
1a\_Candidatus\_Hinthialibacter
1a\_Actinobacteria\_bacterium\_R
1b\_Arabidopsis\_thaliana\_HDA8
1b\_Klebsiella\_pneumoniae\_HdaH
1b\_Vibrio\_sp\_vnigr-6D03\_HdaH
1c\_Shinella\_sp\_DD12\_HdaH
1c\_Haematospirillum\_jordaniae
1c\_Micavibrio\_sp\_TMED2\_Acu
1d\_Legionella\_londiniensis\_Ap
1d\_Thioploca\_ingrica\_DAC
1d\_Neisseria\_zoodegmatis\_DAC
1e\_Stentor\_coeruleus\_HdaH
1e\_Chlorella\_variabilis\_HdaH
1e\_Babesia\_microti\_strain\_RI
1f\_Pneumycystis\_carinii\_HdaH
1f\_Malassezia\_pachydermatis\_H
1f\_Saccharomyces\_cerevisiae\_H
1g\_Homo\_sapiens\_HDAC4
1g\_Saccharomyces\_cerevisiae\_H
1g\_Arabidopsis\_thaliana\_HDA5

1a\_Arabidopsis\_thaliana\_HDA14

1a\_Arabidopsis\_thaliana\_HDA14
1a\_Candidatus\_Hinthialibacter
1a\_Actinobacteria\_bacterium\_R
1b\_Arabidopsis\_thaliana\_HDA8
1b\_Klebsiella\_pneumoniae\_HdaH
1b\_Vibrio\_sp\_vnigr-6D03\_HdaH
1c\_Shinella\_sp\_DD12\_HdaH
1c\_Haematospirillum\_jordaniae
1c\_Micavibrio\_sp\_TMED2\_Acu
1d\_Legionella\_londiniensis\_Ap
1d\_Thioploca\_ingrica\_DAC
1d\_Neisseria\_zoodegmatis\_DAC
1e\_Stentor\_coeruleus\_HdaH
1e\_Chlorella\_variabilis\_HdaH
1e\_Babesia\_microti\_strain\_RI
1f\_Pneumycystis\_carinii\_HdaH
1f\_Malassezia\_pachydermatis\_H
1f\_Saccharomyces\_cerevisiae\_H
1g\_Homo\_sapiens\_HDAC4
1g\_Saccharomyces\_cerevisiae\_H
1g\_Arabidopsis\_thaliana\_HDA5

1a\_Arabidopsis\_thaliana\_HDA14

1a\_Arabidopsis\_thaliana\_HDA14 .....  
1a\_Candidatus\_Hinthialibacter .....  
1a\_Actinobacteria\_bacterium\_R .....  
1b\_Arabidopsis\_thaliana\_HDA8 .....  
1b\_Klebsiella\_pneumoniae\_HdaH .....  
1b\_Vibrio\_sp\_vnigr-6D03\_HdaH .....  
1c\_Shinella\_sp\_DD12\_HdaH .....  
1c\_Haematospirillum\_jordaniae .....  
1c\_Micavibrio\_sp\_TMED2\_Acu .....  
1d\_Legionella\_londiniensis\_Ap .....  
1d\_Thioploca\_ingrica\_DAC .....  
1d\_Neisseria\_zoodegmatidis\_DAC .....  
1e\_Stentor\_coeruleus\_HdaH ..... E.DDEE ..... ES  
1e\_Chlorella\_variabilis\_HdaH ..... A.PAPAPAPAPAAGAEAAEDGGTRKRKRRRG.AGSGVDYVEL ..... NRQL  
1e\_Babesia\_microti\_strain\_RI TSYNCKLHCD ..... M ..... RF  
1f\_Pneumocystis\_carinii\_HdaH ..... KPIK ..... SPQ  
1f\_Malassezia\_pachydermatis\_H ..... RRRQSHAAI ..... STE.PTPARARASARSRNDGERGTSHPAQW ..... VPG ..... ALPV  
1f\_Saccharomyces\_cerevisiae\_H DDISRHLELEIEKKGDE ..... DSDHELKEKNWKNSHQRRL ..... QGNGMYKIPSNTKPHRIRQPQ  
1g\_Homo\_sapiens\_HDAC4 VTAM ..... ASLSVGVKPAEKRPDEE.PM .....  
1g\_Saccharomyces\_cerevisiae\_H ..... FSNN ..... SHQCWKENESRKPRKFKFGRVLRCDTDGLNNII.E.ERF  
1g\_Arabidopsis\_thaliana\_HDA5 LTMTCTLSAVEKFKSGEIP ..... IRP.PAKAYANTLIRGLVEGG ..... RLS

1a\_Arabidopsis\_thaliana\_HDA14

1a\_Arabidopsis\_thaliana\_HDA14 .....  
1a\_Candidatus\_Hinthialibacter .....  
1a\_Actinobacteria\_bacterium\_R .....  
1b\_Arabidopsis\_thaliana\_HDA8 .....  
1b\_Klebsiella\_pneumoniae\_HdaH ..... DRLAQQFGLL .....  
1b\_Vibrio\_sp\_vnigr-6D03\_HdaH ..... DLLAKNTPLL .....  
1c\_Shinella\_sp\_DD12\_HdaH .....  
1c\_Haematospirillum\_jordaniae .....  
1c\_Micavibrio\_sp\_TMED2\_Acu .....  
1d\_Legionella\_londiniensis\_Ap .....  
1d\_Thioploca\_ingrica\_DAC .....  
1d\_Neisseria\_zoodegmatidis\_DAC .....  
1e\_Stentor\_coeruleus\_HdaH EEEDSQESKKTDKA.NNGEPE ..... DN .....  
1e\_Chlorella\_variabilis\_HdaH EEEA.AARR..AAGGSG..GG .....  
1e\_Babesia\_microti\_strain\_RI DQK ..... C ..... QI .....  
1f\_Pneumocystis\_carinii\_HdaH ..... TKNTDKHS .....  
1f\_Malassezia\_pachydermatis\_H ESAG.PA.T..PAAPTQ.RPSHDADTLATLLGQWQLNDTT .....  
1f\_Saccharomyces\_cerevisiae\_H NANT ..... PTYDDSDI.SMISHVSRKHTTRSGGRW .....  
1g\_Homo\_sapiens\_HDAC4 EEEP ..... PL .....  
1g\_Saccharomyces\_cerevisiae\_H EEAT ..... DF ..... ILDSFEEWSDEE .....  
1g\_Arabidopsis\_thaliana\_HDA5 KEEA.EAYI..DKA.VS.KPL ..... RLS

**Supplementary Figure 14: Primary sequence alignment of selected bacterial deacylases of cluster 1 (UniProt accession numbers are shown).**

Show are the following sequences of the following deacylases representing enzymes of cluster 1 and the sub-clusters (code: sub-cluster, accession number/protein name/species): 1a, AT4G33470.1/HDA14/*Arabidopsis thaliana*; 1a, A0A136MHB6/AphA/*Candidatus Hintialibacteria bacterium* OLB16; 1a, A0A1F2W7Q1/HdaH/*Actinobacteria bacterium* RBG\_16\_70\_17; 1b, Q94EJ2/HDA8/*Arabidopsis thaliana*; 1b, A0A378F8Q8/HdaH/*Klebsiella pneumoniae*; 1b, A0A2N0XRJ0/HdaH/*Vibrio sp.* vnigr-6D03; 1c, A0A021X4K7/Deacetylase (DAC)/*Shinella sp.* DD12; 1c, A0A143DCS4/AcuC/*Haematospirillum jordaniae*; 1c, A0A1Z8KYS1/Acu protein/*Micavibrio sp.* TMED2; 1d, A0A0W0VIH3/ApaH/*Legionella londiniensis*; 1d, A0A090BV44/Deacetylase/*Thioploca ingrica*; 1d, A0A1X3CVE4/Deacetylase/*Neisseria zoodegmatis*; 1e, A0A1R2CWG0/HdaH/*Stentor coeruleus*; 1e, E1ZJU5/HdaH/*Chlorella variabilis* (green alga); 1e, A0A1N6LWP9/HOS3/*Babesia microti* (strain RI); 1f, A0A0W4ZQY2/HdaH/*Pneumocystis carinii* (strain B80); 1f, A0A0M9VQN5/HdaH/*Malassezia pachydermatis*; 1f, Q02959/HOS3/*Saccharomyces cerevisiae* (strain ATCC 204508 / S288c); 1g, P56524/HDAC4/*Homo sapiens*; 1g, P53973/Hda1/*Saccharomyces cerevisiae* (strain ATCC 204508 / S288c); 1g, AT5G61060.1 (Q8RX28)/HDA5/*Arabidopsis thaliana*. All sequences were aligned using the T-COFFEE multiple sequence alignment server<sup>1</sup>. The important catalytic residues are highlighted. The secondary structure elements and numbering is shown for the deacylase shown at the top of the amino acid sequences above the sequence alignment. The alignment was created by ESPript version 3.0<sup>2</sup>.

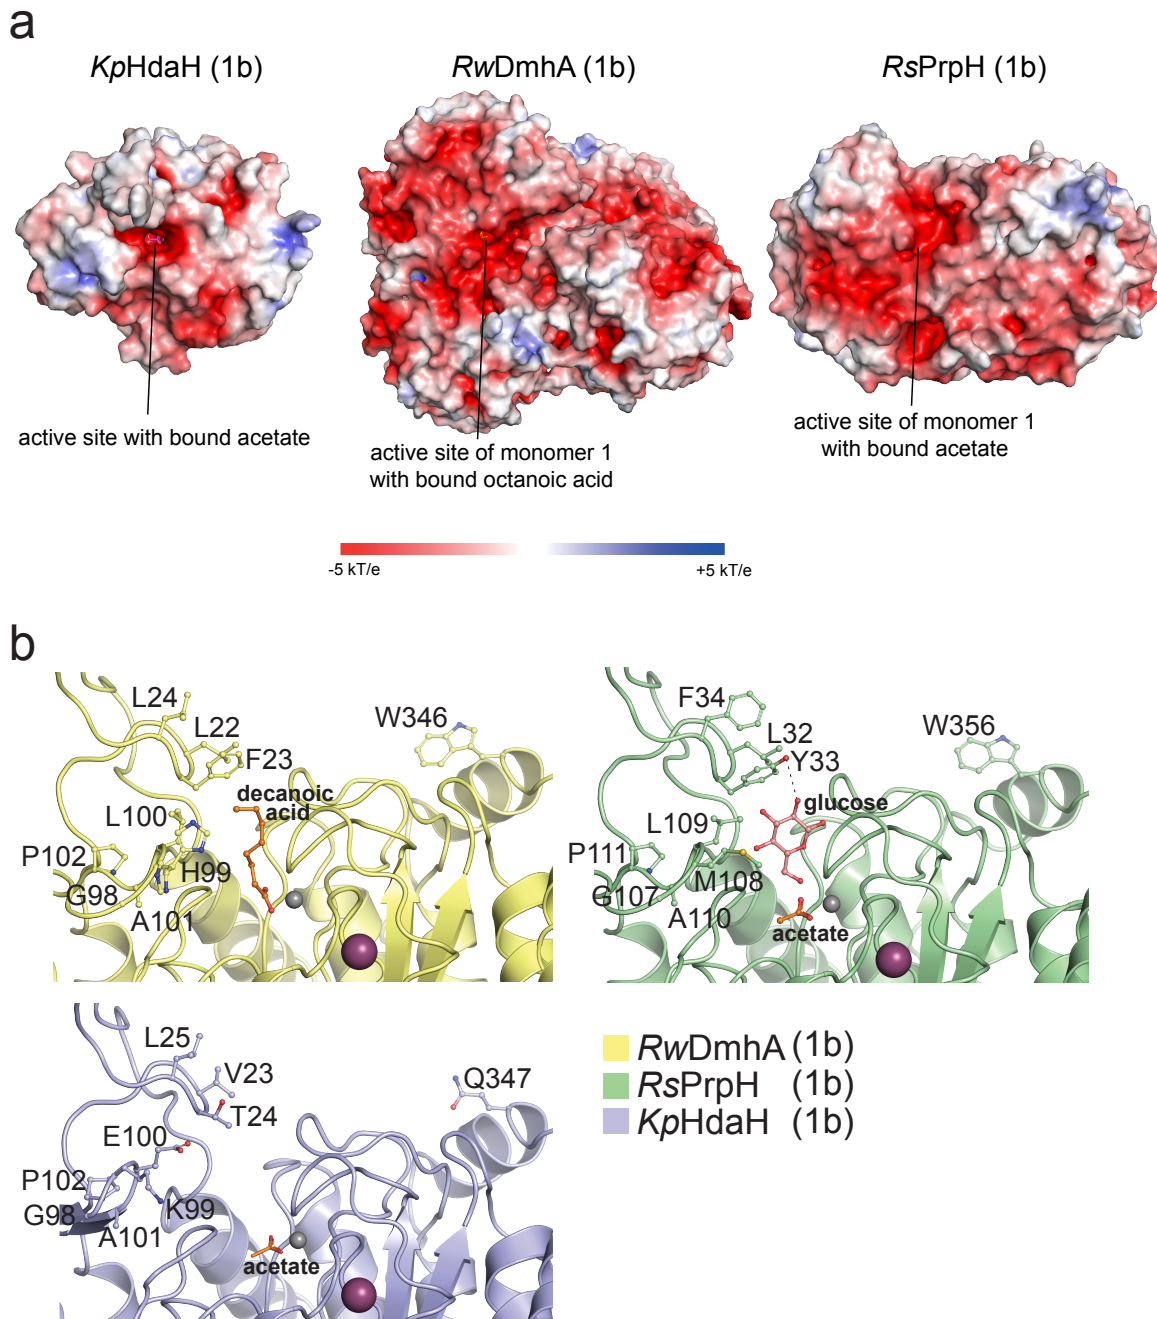

**Supplementary Figure 15: Molecular determinant of substrate specificity for cluster 1 enzymes *KpHdaH* (1b), *RwDmhA* (1b) and *RsPrpH* (1b).**

- a** To show the electrostatics at the active site the electrostatic surface potential was plotted onto the surface of the structures of *KpHdaH* (1b), *RwDmhA* (1b) and *RsPrpH* (1b). As visible, all enzymes show a highly negatively-charged surface surrounding the entry to the active site suggesting to play a role in substrate specificity towards proteins/molecules with neutral/positively charged electrostatic potential. All enzymes show a preference for peptides with a positively-charged residue at -1 position from the acetylated lysine side chain. For *KpHdaH* (1b) a monomer is shown, for *RwDmhA* (1b) a tetramer and for *RsPrpH* (1b) a head-to-head dimer is shown. The electrostatics was calculated using the APBS plugin in PyMOL<sup>4</sup>.
- b** Residues lining the substrate binding tunnel mediate substrate specificity of sub-cluster 1b enzymes. For *RwDmhA* (1b) and *RsPrpH* (1b) we observed differences in sequence motifs lining the substrate binding pocket in the L1-loop (22-LFL-24/32-LYF-34 motif, and the motif 98-GHLAP-102/107-GMLAP-111 as well as W346/W356 in the C-terminal  $\alpha$ -helix lining the active site rim. This is substituted by polar motifs in *KpHdaH* (1b) (23-VTL-25; *KpHdaH*: 99-GKEAP-102; 343-FIOOQ-347; Q347 corresponding to W346/W356 in *RwDmhA* (1b) and *RsPrpH* (1b). This is supported by the observation in *RwDmhA* (1b) a hydrophobic octanoic acid and in *RsPrpH* (1b) a glucose molecule contacted by Y33 of the 32-LYF-34 motif is bound in the substrate binding channel. The substrate access to the active site is determined by the oligomerization of cluster 1b enzymes forming tetramers, the sequence of motifs lining the substrate binding tunnel affecting substrate binding sterically and electrostatically.

2a\_Homo\_sapiens\_HDAC2

2a\_Homo\_sapiens\_HDAC2

2a\_Saccharomyces\_cerevisiae\_Rpd3

2a\_Arabidopsis\_thaliana\_HDA7

2b\_Saccharomyces\_cerevisiae\_Hos1

2b\_Trichomonascus\_ciferrii\_HDAC8

2b\_Candida\_albicans\_HDAC

2c\_Bacillus\_subtilis\_AcuC

2c\_Staphylococcus\_aureus\_AcuC

2c\_Corynebacterium\_lactis\_RW2-5\_AcuC

2d\_Dictyoglomus\_turgidum\_AcuC

2d\_Wenzhouxiangella\_sp\_XN24\_AcuC

2d\_Pseudomonadota\_bacterium\_AcuC

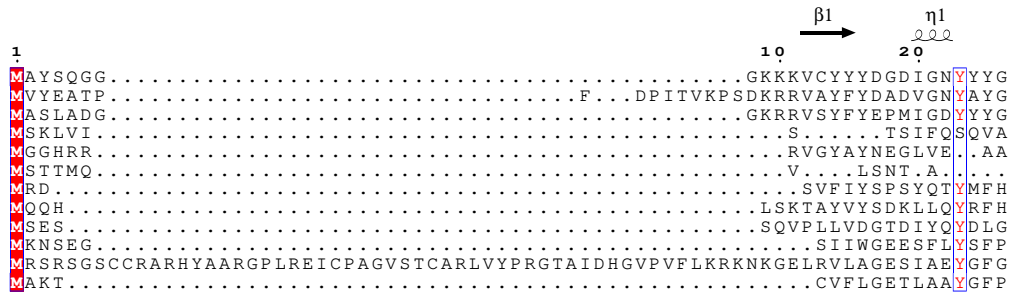

2a\_Homo\_sapiens\_HDAC2

2a\_Homo\_sapiens\_HDAC2

2a\_Saccharomyces\_cerevisiae\_Rpd3

2a\_Arabidopsis\_thaliana\_HDA7

2b\_Saccharomyces\_cerevisiae\_Hos1

2b\_Trichomonascus\_ciferrii\_HDAC8

2b\_Candida\_albicans\_HDAC

2c\_Bacillus\_subtilis\_AcuC

2c\_Staphylococcus\_aureus\_AcuC

2c\_Corynebacterium\_lactis\_RW2-5\_AcuC

2d\_Dictyoglomus\_turgidum\_AcuC

2d\_Wenzhouxiangella\_sp\_XN24\_AcuC

2d\_Pseudomonadota\_bacterium\_AcuC

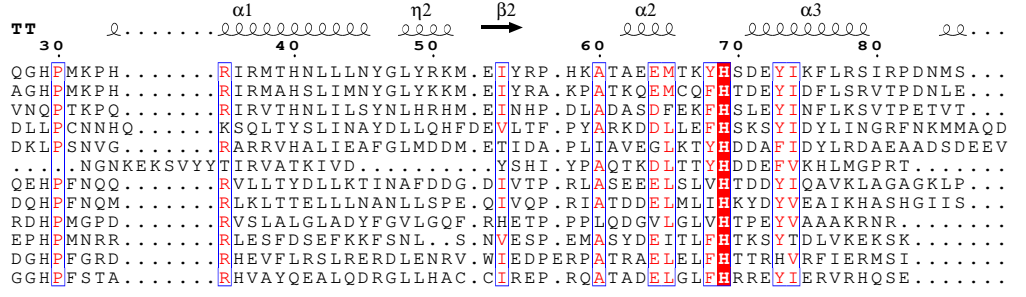

2a\_Homo\_sapiens\_HDAC2

2a\_Homo\_sapiens\_HDAC2

2a\_Saccharomyces\_cerevisiae\_Rpd3

2a\_Arabidopsis\_thaliana\_HDA7

2b\_Saccharomyces\_cerevisiae\_Hos1

2b\_Trichomonascus\_ciferrii\_HDAC8

2b\_Candida\_albicans\_HDAC

2c\_Bacillus\_subtilis\_AcuC

2c\_Staphylococcus\_aureus\_AcuC

2c\_Corynebacterium\_lactis\_RW2-5\_AcuC

2d\_Dictyoglomus\_turgidum\_AcuC

2d\_Wenzhouxiangella\_sp\_XN24\_AcuC

2d\_Pseudomonadota\_bacterium\_AcuC

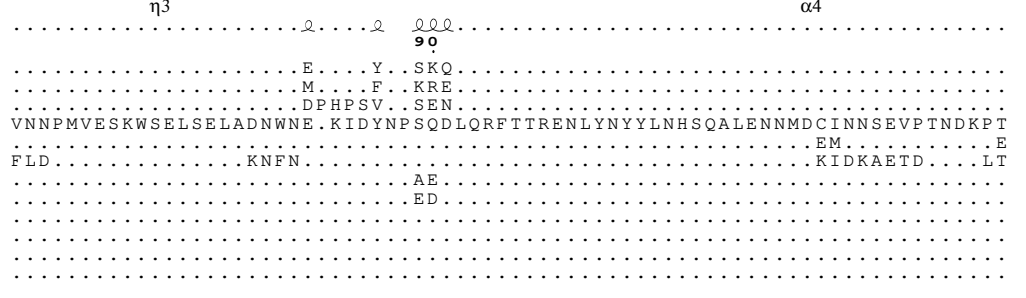

2a\_Homo\_sapiens\_HDAC2

2a\_Homo\_sapiens\_HDAC2

2a\_Saccharomyces\_cerevisiae\_Rpd3

2a\_Arabidopsis\_thaliana\_HDA7

2b\_Saccharomyces\_cerevisiae\_Hos1

2b\_Trichomonascus\_ciferrii\_HDAC8

2b\_Candida\_albicans\_HDAC

2c\_Bacillus\_subtilis\_AcuC

2c\_Staphylococcus\_aureus\_AcuC

2c\_Corynebacterium\_lactis\_RW2-5\_AcuC

2d\_Dictyoglomus\_turgidum\_AcuC

2d\_Wenzhouxiangella\_sp\_XN24\_AcuC

2d\_Pseudomonadota\_bacterium\_AcuC

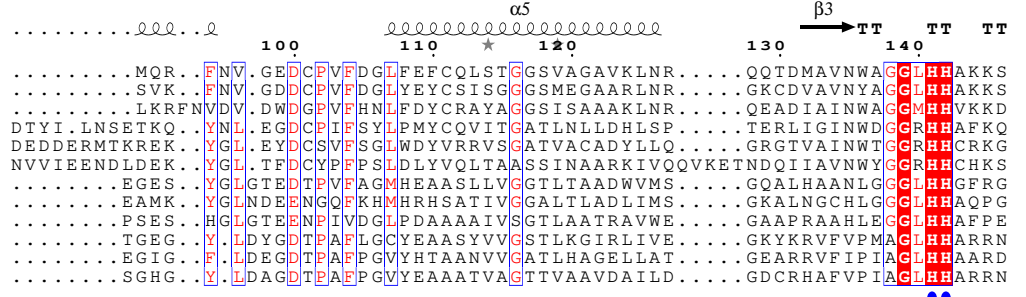

2a\_Homo\_sapiens\_HDAC2

2a\_Homo\_sapiens\_HDAC2

2a\_Saccharomyces\_cerevisiae\_Rpd3

2a\_Arabidopsis\_thaliana\_HDA7

2b\_Saccharomyces\_cerevisiae\_Hos1

2b\_Trichomonascus\_ciferrii\_HDAC8

2b\_Candida\_albicans\_HDAC

2c\_Bacillus\_subtilis\_AcuC

2c\_Staphylococcus\_aureus\_AcuC

2c\_Corynebacterium\_lactis\_RW2-5\_AcuC

2d\_Dictyoglomus\_turgidum\_AcuC

2d\_Wenzhouxiangella\_sp\_XN24\_AcuC

2d\_Pseudomonadota\_bacterium\_AcuC

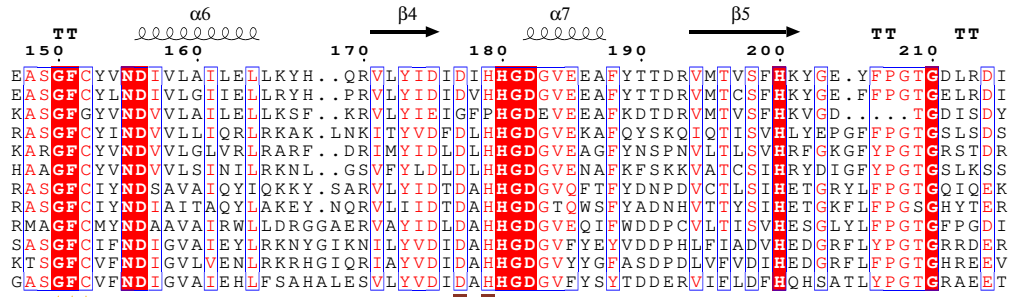

2a\_Homo\_sapiens\_HDAC2

η4      β6      α8      β7      η5      α9

220      230      240      250      260      270      280

2a\_Homo\_sapiens\_HDAC2  
 2a\_Saccharomyces\_cerevisiae\_Rpd3  
 2a\_Arabidopsis\_thaliana\_HDA7  
 2b\_Saccharomyces\_cerevisiae\_Hos1  
 2b\_Trichomonascus\_ciferrii\_HDAC8  
 2b\_Candida\_albicans\_HDAC  
 2c\_Bacillus\_subtilis\_AcuC  
 2c\_Staphylococcus\_aureus\_AcuC  
 2c\_Corynebacterium\_lactis\_RW2-5\_AcuC  
 2d\_Dictyoglomus\_turgidum\_AcuC  
 2d\_Wenzhouxiangella\_sp\_XN24\_AcuC  
 2d\_Pseudomonadota\_bacterium\_AcuC

2a\_Homo\_sapiens\_HDAC2

β8      α10

290      300      310      320      330

2a\_Homo\_sapiens\_HDAC2  
 2a\_Saccharomyces\_cerevisiae\_Rpd3  
 2a\_Arabidopsis\_thaliana\_HDA7  
 2b\_Saccharomyces\_cerevisiae\_Hos1  
 2b\_Trichomonascus\_ciferrii\_HDAC8  
 2b\_Candida\_albicans\_HDAC  
 2c\_Bacillus\_subtilis\_AcuC  
 2c\_Staphylococcus\_aureus\_AcuC  
 2c\_Corynebacterium\_lactis\_RW2-5\_AcuC  
 2d\_Dictyoglomus\_turgidum\_AcuC  
 2d\_Wenzhouxiangella\_sp\_XN24\_AcuC  
 2d\_Pseudomonadota\_bacterium\_AcuC

2a\_Homo\_sapiens\_HDAC2

η6

340

2a\_Homo\_sapiens\_HDAC2  
 2a\_Saccharomyces\_cerevisiae\_Rpd3  
 2a\_Arabidopsis\_thaliana\_HDA7  
 2b\_Saccharomyces\_cerevisiae\_Hos1  
 2b\_Trichomonascus\_ciferrii\_HDAC8  
 2b\_Candida\_albicans\_HDAC  
 2c\_Bacillus\_subtilis\_AcuC  
 2c\_Staphylococcus\_aureus\_AcuC  
 2c\_Corynebacterium\_lactis\_RW2-5\_AcuC  
 2d\_Dictyoglomus\_turgidum\_AcuC  
 2d\_Wenzhouxiangella\_sp\_XN24\_AcuC  
 2d\_Pseudomonadota\_bacterium\_AcuC

2a\_Homo\_sapiens\_HDAC2

α11

350      360      370      380      390      400      410

2a\_Homo\_sapiens\_HDAC2  
 2a\_Saccharomyces\_cerevisiae\_Rpd3  
 2a\_Arabidopsis\_thaliana\_HDA7  
 2b\_Saccharomyces\_cerevisiae\_Hos1  
 2b\_Trichomonascus\_ciferrii\_HDAC8  
 2b\_Candida\_albicans\_HDAC  
 2c\_Bacillus\_subtilis\_AcuC  
 2c\_Staphylococcus\_aureus\_AcuC  
 2c\_Corynebacterium\_lactis\_RW2-5\_AcuC  
 2d\_Dictyoglomus\_turgidum\_AcuC  
 2d\_Wenzhouxiangella\_sp\_XN24\_AcuC  
 2d\_Pseudomonadota\_bacterium\_AcuC

2a\_Homo\_sapiens\_HDAC2

420      430      440      450      460      470

2a\_Homo\_sapiens\_HDAC2  
 2a\_Saccharomyces\_cerevisiae\_Rpd3  
 2a\_Arabidopsis\_thaliana\_HDA7  
 2b\_Saccharomyces\_cerevisiae\_Hos1  
 2b\_Trichomonascus\_ciferrii\_HDAC8  
 2b\_Candida\_albicans\_HDAC  
 2c\_Bacillus\_subtilis\_AcuC  
 2c\_Staphylococcus\_aureus\_AcuC  
 2c\_Corynebacterium\_lactis\_RW2-5\_AcuC  
 2d\_Dictyoglomus\_turgidum\_AcuC  
 2d\_Wenzhouxiangella\_sp\_XN24\_AcuC  
 2d\_Pseudomonadota\_bacterium\_AcuC

2a\_Homo\_sapiens\_HDAC2

480

```
2a_Homo_sapiens_HDAC2          DTKGTKSEQLSNP
2a_Saccharomyces_cerevisiae_Rpd3  ....N.EFY...
2a_Arabidopsis_thaliana_HDA7     N....D.PR...I
2b_Saccharomyces_cerevisiae_Hos1  .....
2b_Trichomonascus_ciferrii_HDAC8 .....
2b_Candida_albicans_HDAC         .....
2c_Bacillus_subtilis_AcuC        .....
2c_Staphylococcus_aureus_AcuC    .....
2c_Corynebacterium_lactis_RW2-5_AcuC .....
2d_Dictyoglomus_turgidum_AcuC    .....
2d_Wenzhouxiangella_sp_XN24_AcuC .....
2d_Pseudomonadota_bacterium_AcuC .....
```



**Supplementary Figure 16: Primary sequence alignment of selected bacterial deacylases of cluster 2 (UniProt accession numbers are shown).**

Show are the following sequences of the following deacylases representing enzymes of cluster 2 and the sub-clusters (code: sub-cluster, accession number/protein name/species): 2a, Q92769/HDAC2/*Homo sapiens*; 2a, P32561/Rpd3/*Saccharomyces cerevisiae* (strain ATCC 204508 / S288c) (Baker's yeast); 2a, Q9FH09/Hda7/*Arabidopsis thaliana*; 2, bQ12214/Hos1/*Saccharomyces cerevisiae* (strain ATCC 204508 / S288c) (Baker's yeast); 2b, A0A642V618/HDAC8/*Trichomonascus ciferrii*; 2b, A0A8H6F6H7/HDAC/*Candida albicans*; 2c, P39067/AcuC/*Bacillus subtilis* (strain 168); 2c, Q6GFX3/AcuC/*Staphylococcus aureus* (strain MRSA252); 2c, A0A0K2H387/AcuC/*Corynebacterium lactis* RW2-5; 2d, B8DYU0/AcuC/*Dictyoglomus turgidum* (strain DSM 6724 / Z-1310); 2d, A0A6M1Y8Z6/AcuC/*Wenzhouxiangella* sp. XN24; 2d, A0A6L7MC72/AcuC/*Pseudomonadota bacterium*. All sequences were aligned using the T-COFFEE multiple sequence alignment server<sup>1</sup>. The important catalytic residues are highlighted. The secondary structure elements and numbering is shown for the deacylase shown at the top of the amino acid sequences above the sequence alignment. The alignment was created by ESPript version 3.0<sup>2</sup>.

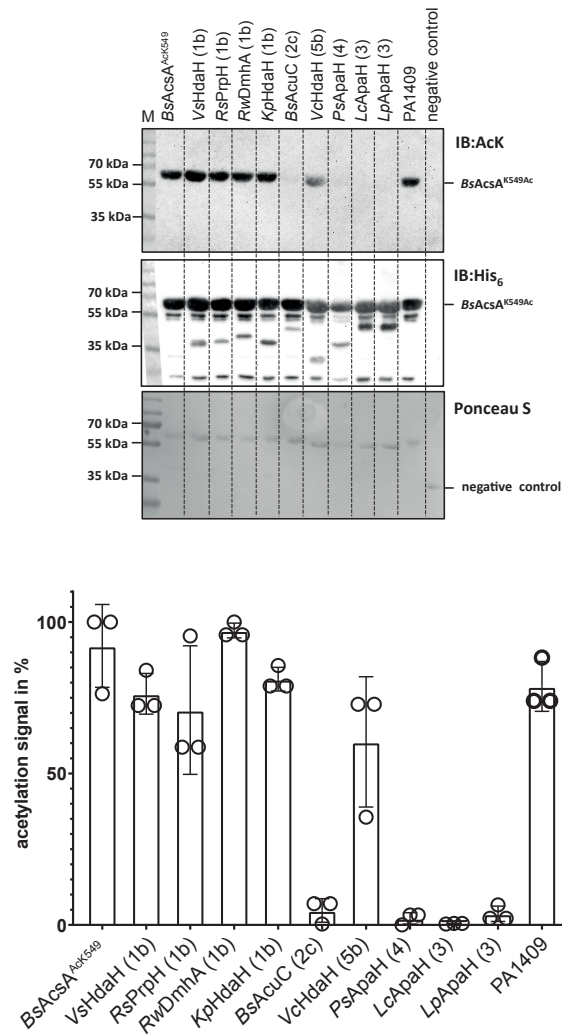

**Supplementary Figure 17: Deacetylation of acetylated *Bacillus subtilis* deacetylase AcsA by bacterial deacylases.**

Indicated bacterial deacylases were analysed for their capacity to deacetylate K549-acetylated *B. subtilis* AcsA. As a readout an immunoblot was performed and stained with an anti-acetyl-lysine antibody (IB: AcK). Lys549-acetylated *B. subtilis* AMP-forming acetyl-CoA synthetase (BsAcsA<sup>AcK549</sup>) was used as positive control and non-acetylated His<sub>6</sub>-Ran as negative control. Ponceau S-red staining was performed as loading control (LC: PoS). The quantification was done using ImageJ. The signal of the anti-AcK-blot was normalized to the anti-His<sub>6</sub>-blot (IB: His<sub>6</sub>) used as loading control. The highest signal of each blot was set to 100%. One representative immunoblot is shown. Ponceau S-red staining of the membrane was done as second loading control. Three biologically independent replicates were performed ( $n=3$ ). The bar graph shows the values mean $\pm$ SD. Source data are provided as Source Data file.

**VcHdaH (5b)**

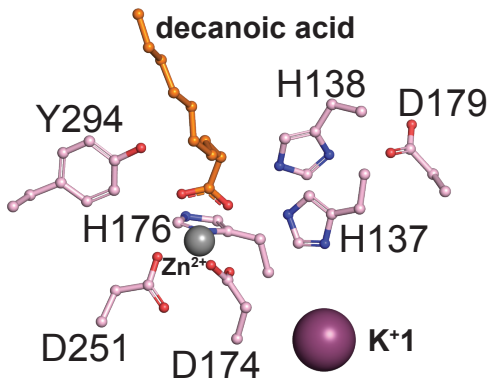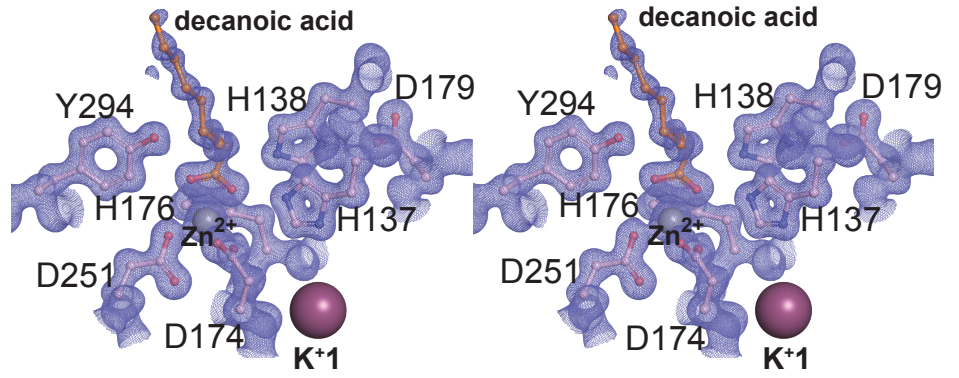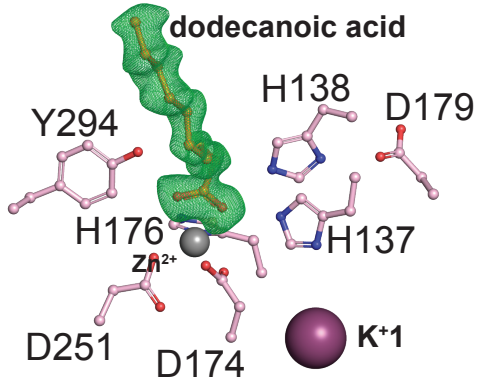

**PsApaH (4)**

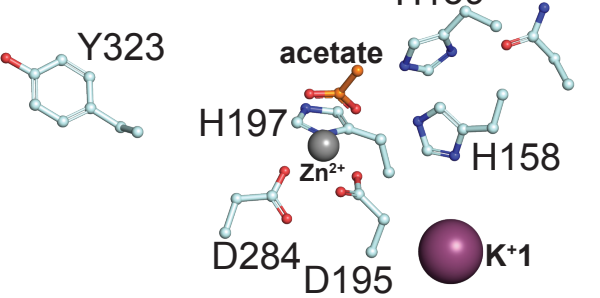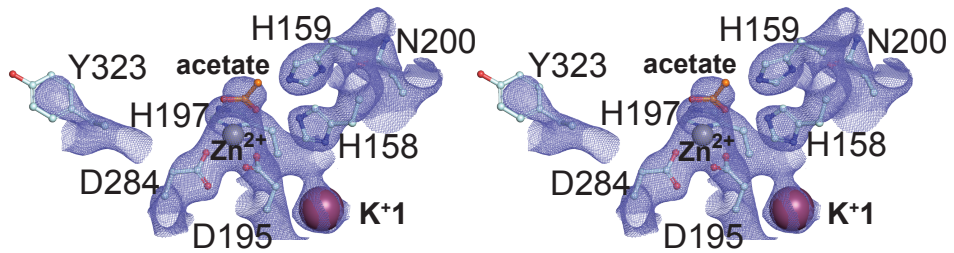

**LcApaH (3)**

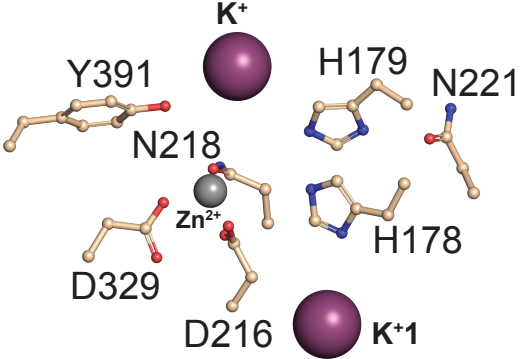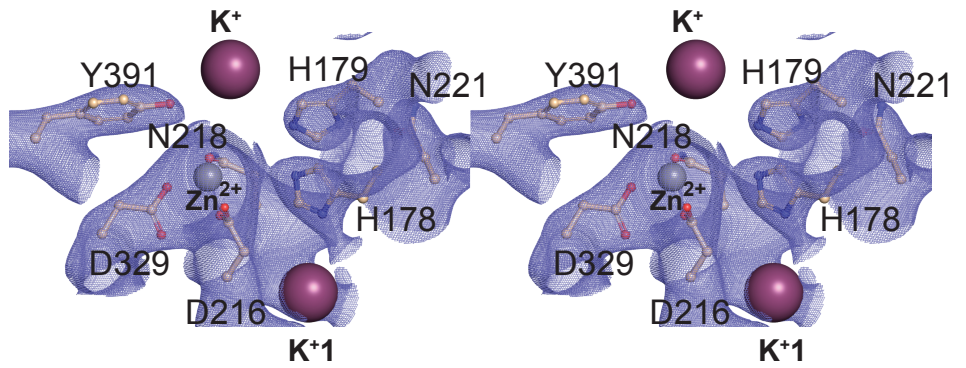

**LpApaH (3)**

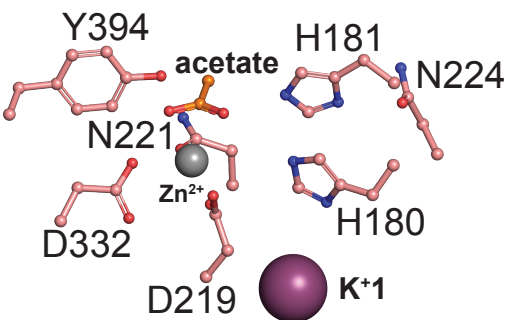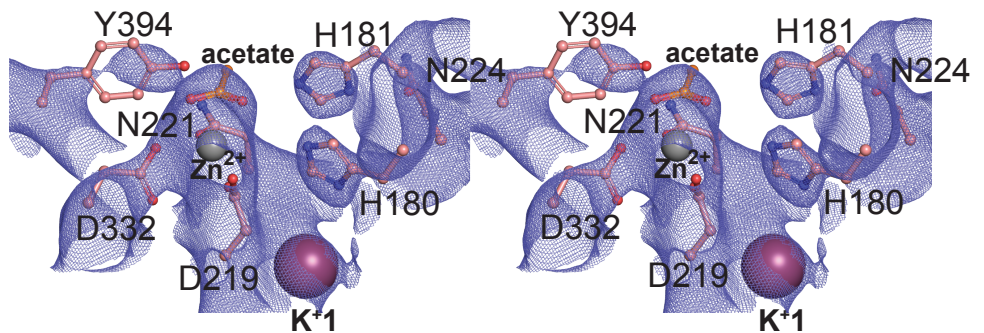

**Supplementary Figure 18: Stereo images of representative electron density for structures of bacterial deacylases solved in this study.**

Stereo figures for the structures of bacterial deacylases: *VcHdaH* of sub-cluster 5b, *LcApaH* as well as *LpApaH* of cluster 3 and *PsApaH* of cluster 4. For all structures a representative closeup of the active site is shown on the left, including the catalytic  $Zn^{2+}$ -ion, including the coordinating His and the two Asp residues, the catalytic base His and the active site Tyr important to orient and polarize the carbonyl-group of the substrate and to stabilize the tetrahedral intermediate. As stereo images the closeup of the active site is shown with the is the electron density of the  $2F_o-F_c$  map contoured at  $1\sigma$  in blue. For *VcHdaH* (5b) the  $F_o-F_c$  omit map is shown in green for the bound decanoic acid (contour level  $3\sigma$ ). In violet spheres the potassium ions are shown, the catalytic  $Zn^{2+}$ -ion is shown as grey sphere. The stereo diagrams were prepared in wall-eyed viewing mode with PyMOL version 2.3.4<sup>3</sup>.





5a\_Acinetobacter\_wuhouensis\_HDAC

80 90 100 110 α5 β3 TT

5a\_Acinetobacter\_wuhouensis\_HDAC KP...WNEQLRDAVLAINAGQLMATELAFE...H.GI.A.ANIAQCFHH

5a\_Neisseriaceae\_bacterium\_HDAC L...KTADSLWINGSFVSAARYAVK...N.KI.STVSPSTSGFHH

5a\_Treponema\_sp\_HDAC F...PEVAAALPWTGSMYAAAWAAE...RGGF.A.ASPTSAGFHH

5b\_Vibrio\_cholerae\_HdaH FP...WSKTLIERTLHSVGGTCLTVEQALQ...S.GV.A.IHLSGGYHH

5b\_Pseudomonas\_alcaligenes\_AcuC LP...WSEPLARRTRVAVGGSLLAELALK...H.GA.A.CHLAGGTHH

5b\_Leptospiraceae\_bacterium\_HDAC LP...FSEQLIHRTLIAPAGTLLASKLAL...H.GV.A.CHIGGTHH

5c\_Moraxella\_bovis\_HDAC LP...MSKELIDRERLVVGTIECAKFLN...D.GI.S.LSTSGCTHH

5c\_Flavobacterium\_indicum\_HDAC-family FP...LSSELIEREFRLAQGTIEGAKNA...D.KI.A.FNIAAGTTHH

5c\_Bdellovibrionales\_bacterium\_HDAC FP...WSPIMPLRSRASVGGFMACRYALE...N.GF.A.GNLSGCTHH

5d\_Turneriella\_parva\_HdaH IP...IDERIVNAVCTAAGGTILAEALALK...H.GV.A.SNLSGGFHH

5d\_Leptospira\_interrogans\_HdaH LP...LTKQIVHSFVLAVGGTILSMELTQK...Y.KF.V.YHIGGGFHH

5d\_Leptospira\_brenneri\_HDAC LP...LNRSIVESFMYGVGGTVMAEELSKN...F.QF.A.FNMGGYHH

5e\_Archangium\_gephyra\_HDAC DV...YVDEVLRTLRLAVGATIAASFSLR...R.RVPT.INLFGCFHH

5e\_Nannocystis\_exedens\_AcuC EV...DTARILDQRAMTGGTMLATDIALG...TGKI.A.INLGGCFHH

5e\_Deltaproteobacteria\_bacterium\_HDAC VP...PETVDV.DALVRGQRRVGGTVEAALKVTRG...EV.KV.G.FNLGGFHH

5f\_Micavibrio\_sp\_HDAC\_domain VP...FT.LTQHLLVTPLLYHTGGTILAGELAAE...K.GW.A.MNLGGAAHH

5f\_Homo\_sapiens\_HDAC11 LP...NF.LVQKVLRLPRTQGGTILMAGKLA...R.GW.A.INVGGFHH

5f\_Arabidopsis\_thaliana\_HDA2 FP...NF.LVQKVLRLPRTQGGTILMAGKLA...R.GW.A.INVGGFHH

5g\_Bacteriovorax\_stolpii\_AcuC-like RD...W.KELVETILMQVAMTYNSTKYALK...N.GF.S.YHLGCMHH

5g\_Gracilinema\_caldarium\_HdaH RP...L.SELFTTIRAQVGGTYLAARLALAHRSKPSGVSSEPLSTNNSNP.GF.C.YYLGGMHH

5g\_Bacteriovorax\_sp\_MedPE-SWde\_HDAC\_domain LP...L.SDFVKKALSHINGTILACESAMD...S.GF.S.YHLGGMHH

5a\_Acinetobacter\_wuhouensis\_HDAC

120 130 140 α6 β4 α7 β5 TT TT

5a\_Acinetobacter\_wuhouensis\_HDAC ARP...EYGGSFCTFNGLALIAQ...Q.YPNKRIFTLDCQHGDDTAEFTRKYNNLYN.FSIYGLA...

5a\_Neisseriaceae\_bacterium\_HDAC AEYK...KICGFCTFNGLMLAVLLKKE.GLANKIAILD...DMHYNGT...TDNIINKLKIDY.VSHYTLG...

5a\_Treponema\_sp\_HDAC ACW...DRGMGFCFTFNGLAIAAVLLRER.GLARRV...GILDLDMHYNGTAEILDRGLSSEVHLHYTFG...

5b\_Vibrio\_cholerae\_HdaH AHAD...DFSGFCFLNDAIAAHFALSRL.PSVDKV...LIDSDVHHGGDTATLCAERDDIIT.VSFHCDK...

5b\_Pseudomonas\_alcaligenes\_AcuC AHF...DEASGFCFLNDLAVVARYMLES.GRAGRV...LIDSDVHHGGDTARLLENVPDAIT.VSLHCEK...

5b\_Leptospiraceae\_bacterium\_HDAC AHY...SFGSGFCFLNDLAFSSALNQM.KPDLKIL...FIDHDVHGGDTASILKNEKNIYT.VSVHCEK...

5c\_Moraxella\_bovis\_HDAC AFAD...SSEGGFCFLNDICVANSVLLNQ.GLAKRIL...LIDHDVHGGGNASIMADNPHVVF.VSMHGKK...

5c\_Flavobacterium\_indicum\_HDAC-family AYS...NRGEAFCLNDQAIQAQYLLNQ.KLAKQIL...LIDHDVHGGNGTAEIFQNNRPFVTF.VSVHGKS...

5c\_Bdellovibrionales\_bacterium\_HDAC AFAD...HAEAFCLNDFAVAAYVLKQK.HKITQLA...IVDLDVHGGGNASMLQSGQGIIFI.VSMHGEK...

5d\_Turneriella\_parva\_HdaH AFAD...HAEAFCLNDTVLAIARLRKT.RPGLKV...AVDLDVHGGNGTAKLLQGDENSYTF.VSMHEKE...

5d\_Leptospira\_interrogans\_HdaH SMP...DRAEGFCYLNDAAIASKLYQKE.YPDKKIL...FIDLDLHGGNGNSYIFQNDKPVFT.VSMHQEN...

5d\_Leptospira\_brenneri\_HDAC SFP...DKAEGFCYLNDAVAIRKQKET.NPDLNAL...IIDLHGGNGNSYIFQYDDKPVFT.VSMHQEN...

5e\_Archangium\_gephyra\_HDAC AAP...NRGAFCALNDMAVAELRAQ.GFQGV...LIDDFHPDGTASCLGDDASVWL.GSISGAD...

5e\_Nannocystis\_exedens\_AcuC AHR...AIGRGGFCVHDDVAVAIAEORAL.GFHERI...LVVDLDHGGDTRALFADDPVFT.VSIIHNH...

5e\_Deltaproteobacteria\_bacterium\_HDAC AEP...SKGSGFCYLNDAVAIARVRHD.GYKGRIL...AVDLDHGGNGSLVAFADDPVFT.VSVHGS...

5f\_Micavibrio\_sp\_HDAC\_domain AHAN...DASGFCMVADITMAIKNLRQRHKHMRN...IMIDLDAHGGNGRPFADNDPVYTI.IDMFTYGV...

5f\_Homo\_sapiens\_HDAC11 CSS...DRGGGFCAYADITLAIKFLFERVEGISRA...TIDLDAHGGNGHERDFMDKRVYI.MDVYNRH...

5f\_Arabidopsis\_thaliana\_HDA2 CTA...ERGGGFCAFADISLCHFAFLR.LRISRVM...TIDLDAHGGNGHETDLDGDNRVYI.LDMYNPE...

5g\_Bacteriovorax\_stolpii\_AcuC-like SMS...FAGRGFCVNDIVITLRKLQNE.GAIKTAW...VVDVHGGDGAPEILQNDTIRT.FSITHMKE...

5g\_Gracilinema\_caldarium\_HdaH ARY...DSGAGFCFLNDIITIAARRLKAE.GLISSI...WIDLDAHGGDTAELASGDPICILT.VSITHMAL...

5g\_Bacteriovorax\_sp\_MedPE-SWde\_HDAC\_domain AMS...ERPGGFCFLNDMVTAIKYLQQN.GKIKNAV...IDLDAHGGDTAQMTYSDDSIIRS.VSITHMKG...

5a\_Acinetobacter\_wuhouensis\_HDAC

180 190 200 210 220 β6 α8 β7 TT TTT

5a\_Acinetobacter\_wuhouensis\_HDAC ...FGY...TYER...AESRH...VHTKNG.SF.AQ...YMLA...LHEAFQK...AH.E.WQAD...I...I

5a\_Neisseriaceae\_bacterium\_HDAC ...KHY...TQDE...QEVVA...AK...FLKEL...LPSIVED...LI...KDV...V...L...F

5a\_Treponema\_sp\_HDAC ...G.D...PKTADR...EGFDG...ELWLAL...LDGIVERG...F...ADCE...V...L

5b\_Vibrio\_cholerae\_HdaH ...NF...ARKP...ASSMD...VGFANQ...T...D...E...F...L...S...T...F...I...Q...V...M...E...S...A...V...N...L...Y...R...P...D...I...L

5b\_Pseudomonas\_alcaligenes\_AcuC ...NF...ARKA...KSDWD...IGLPIGM...D...T...D...Y...L...K...V...H...D...S...L...G...Y...L...L...L...A...L...Y...P...D...I...V...L

5b\_Leptospiraceae\_bacterium\_HDAC ...NF...YRKE...TSTVD...VGLYAGMS...D...D...E...Y...L...T...I...V...E...S...T...L...N...E...S...I...S...R...F...S...P...D...I...V...L

5c\_Moraxella\_bovis\_HDAC ...NY...FIKP...LSDLD...IELDDGTG...D...D...D...Y...L...S...L...K...Y...H...L...P...K...V...L...D...D...F...A...P...D...F...V...F

5c\_Flavobacterium\_indicum\_HDAC-family ...NY...FKKE...QSDLD...IALPDQTS...D...A...D...Y...L...A...L...I...S...K...E...I...P...K...L...I...Q...Q...V...Q...P...D...F...H...F

5c\_Bdellovibrionales\_bacterium\_HDAC ...NY...FKKI...NSDLD...IALPNQ...C...D...D...E...Y...L...T...K...L...S...D...A...L...P...K...V...I...A...T...R...P...Q...I...L

5d\_Turneriella\_parva\_HdaH ...NY...VKE...TGSHD...VELPSHLG...D...A...E...Y...L...R...L...A...E...N...L...D...K...L...K...A...F...F...P...D...L...I...F

5d\_Leptospira\_interrogans\_HdaH ...LY...KKE...KSDLD...ISLEEG...I...G...D...K...E...Y...L...E...L...L...E...K...S...L...R...K...I...E...S...D...F...K...P...D...L...I...F

5d\_Leptospira\_brenneri\_HDAC ...LY...KKE...VSNLD...VNLEPNTK...D...D...E...Y...L...S...T...L...E...S...S...L...N...R...N...I...R...K...D...F...D...S...N...I...Y

5e\_Archangium\_gephyra\_HDAC ...WGS...L.P...G.VDE...VRLPPGTS...D...G...A...Y...L...D...A...L...D...G...L...D...R...M...P...S...L...E...L...V...F

5e\_Nannocystis\_exedens\_AcuC ...HWG...TEAI...ASTS...VALGDVVG...D...T...L...Y...L...E...T...V...Q...L...H...T...E...A...L...R...Q...H...R...P...R...L...Y

5e\_Deltaproteobacteria\_bacterium\_HDAC ...WV...QRQAT...ADAG...IQLPRTG...D...R...A...Y...L...E...A...L...R...Y...S...L...P...D...V...F...A...E...F...K...P...E...V...V...F

5f\_Micavibrio\_sp\_HDAC\_domain PDGDMFY...P.DDRRAM...QRINIP...VKLNFNTK...D...D...T...Y...L...Q...L...Q...N...A...L...K...T...A...K...T...D...F...A...P...D...M...I...F

5f\_Homo\_sapiens\_HDAC11 ...IY...P.GDRFAK...QAIRK...VELEWGT...D...D...E...Y...L...D...K...V...E...R...N...I...K...K...S...L...Q...E...H...L...P...D...V...V...F

5f\_Arabidopsis\_thaliana\_HDA2 ...IY...P.FDYRAR...RFIDQK...VEVMSGTT...D...D...E...Y...L...R...K...L...D...E...A...L...E...V...A...S...R...N...F...Q...P...E...L...V...I

5g\_Bacteriovorax\_stolpii\_AcuC-like ...GW...P.LNSGTVRDP...WFIPSSID...VGIDV...G...E...D...D...Q...Y...L...A...R...L...E...S...L...L...E...L...M...Q...E...R...F...P...D...V...I

5g\_Gracilinema\_caldarium\_HdaH ...GW...P.LDPETLAHAVPSRAPLVASD...DIPVSKED...QAS...Y...V...S...R...L...A...S...G...L...Q...L...E...M...L...S...G...G...K...P...D...L...A...I

5g\_Bacteriovorax\_sp\_MedPE-SWde\_HDAC\_domain ...GW...P.LDKEDKNDP...S.YIPSSFD...I...E...V...E...R...D...D...D...Y...L...S...L...K...K...G...L...E...D...F...N...P...R...E...D...F...A...I

5a\_Acinetobacter\_wuhouensis\_HDAC

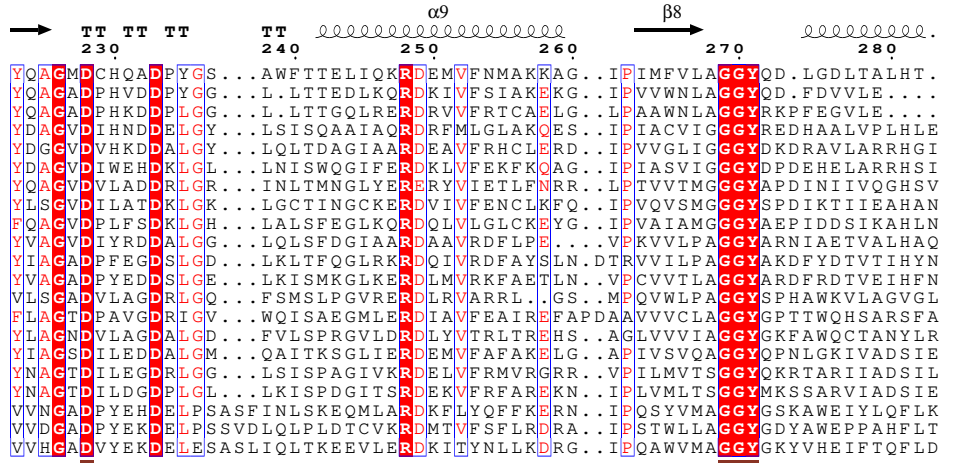

5a\_Acinetobacter\_wuhouensis\_HDAC

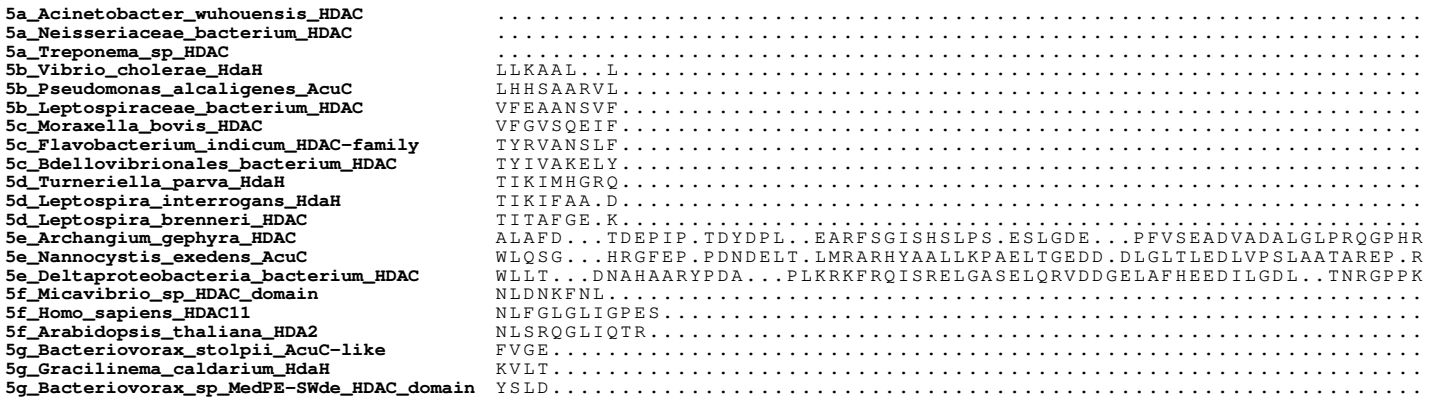

5a\_Acinetobacter\_wuhouensis\_HDAC

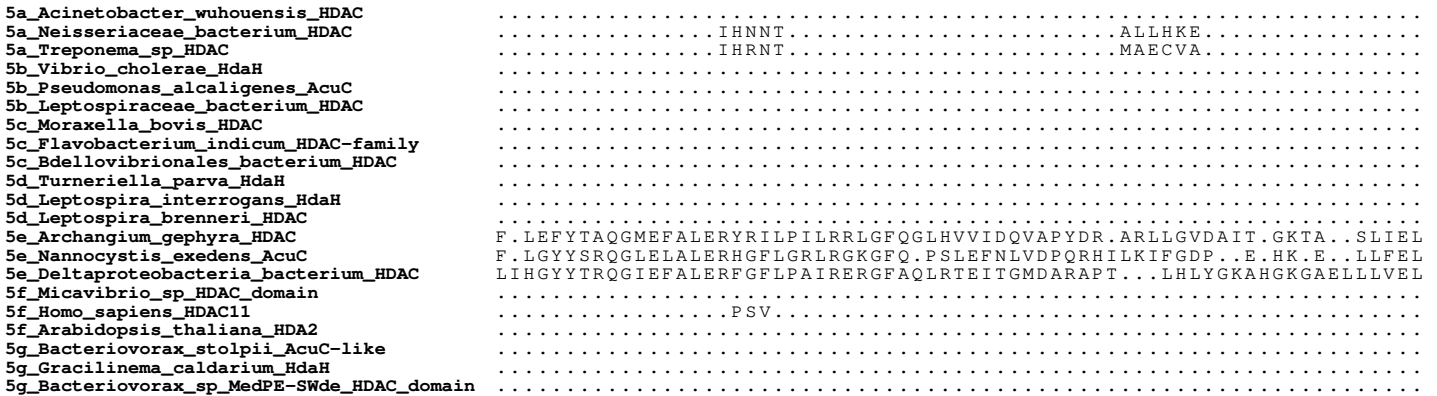



5a\_Acinetobacter\_wuhouensis\_HDAC ..... QQ

5a\_Acinetobacter\_wuhouensis\_HDAC ..... QT

5a\_Neisseriaceae\_bacterium\_HDAC ..... IL

5a\_Treponema\_sp\_HDAC ..... AQGD

5b\_Vibrio\_cholerae\_HdaH ..... VYYG

5b\_Pseudomonas\_alcaligenes\_AcuC ..... IL

5b\_Leptospiraceae\_bacterium\_HDAC ..... AQGD

5c\_Moraxella\_bovis\_HDAC ..... VYYG

5c\_Flavobacterium\_indicum\_HDAC-family ..... IL

5c\_Bdellovibrionales\_bacterium\_HDAC ..... AQGD

5d\_Turneriella\_parva\_HdaH ..... VYYG

5d\_Leptospira\_interrogans\_HdaH ..... IL

5d\_Leptospira\_brenneri\_HDAC ..... AQGD

5e\_Archangium\_gephyra\_HDAC ..... VYYG

5e\_Nannocystis\_exedens\_AcuC ..... IL

5e\_Deltaproteobacteria\_bacterium\_HDAC ..... AQGD

5f\_Micavibrio\_sp\_HDAC\_domain ..... VYYG

5f\_Homo\_sapiens\_HDAC11 ..... IL

5f\_Arabidopsis\_thaliana\_HDA2 ..... AQGD

5g\_Bacteriovorax\_stolpii\_AcuC-like ..... VYYG

5g\_Gracilinema\_caldarium\_HdaH ..... IL

5g\_Bacteriovorax\_sp\_MedPE-SWde\_HDAC\_domain ..... AQGD

5a\_Acinetobacter\_wuhouensis\_HDAC ..... QQ

5a\_Acinetobacter\_wuhouensis\_HDAC ..... 290

5a\_Neisseriaceae\_bacterium\_HDAC ..... VYYG

5a\_Treponema\_sp\_HDAC ..... IL

5b\_Vibrio\_cholerae\_HdaH ..... AQGD

5b\_Pseudomonas\_alcaligenes\_AcuC ..... VYYG

5b\_Leptospiraceae\_bacterium\_HDAC ..... IL

5c\_Moraxella\_bovis\_HDAC ..... AQGD

5c\_Flavobacterium\_indicum\_HDAC-family ..... VYYG

5c\_Bdellovibrionales\_bacterium\_HDAC ..... IL

5d\_Turneriella\_parva\_HdaH ..... AQGD

5d\_Leptospira\_interrogans\_HdaH ..... VYYG

5d\_Leptospira\_brenneri\_HDAC ..... IL

5e\_Archangium\_gephyra\_HDAC ..... AQGD

5e\_Nannocystis\_exedens\_AcuC ..... VYYG

5e\_Deltaproteobacteria\_bacterium\_HDAC ..... IL

5f\_Micavibrio\_sp\_HDAC\_domain ..... AQGD

5f\_Homo\_sapiens\_HDAC11 ..... VYYG

5f\_Arabidopsis\_thaliana\_HDA2 ..... IL

5g\_Bacteriovorax\_stolpii\_AcuC-like ..... AQGD

5g\_Gracilinema\_caldarium\_HdaH ..... VYYG

5g\_Bacteriovorax\_sp\_MedPE-SWde\_HDAC\_domain ..... IL

5a\_Acinetobacter\_wuhouensis\_HDAC ..... E

5a\_Neisseriaceae\_bacterium\_HDAC ..... G

5a\_Treponema\_sp\_HDAC ..... RTWAAAEL ..... D

5b\_Vibrio\_cholerae\_HdaH ..... S ..... AG ..... Y

5b\_Pseudomonas\_alcaligenes\_AcuC ..... A ..... QL ..... R

5b\_Leptospiraceae\_bacterium\_HDAC ..... N ..... V ..... L

5c\_Moraxella\_bovis\_HDAC ..... K ..... LL ..... A

5c\_Flavobacterium\_indicum\_HDAC-family ..... S ..... I

5c\_Bdellovibrionales\_bacterium\_HDAC ..... S ..... K

5d\_Turneriella\_parva\_HdaH ..... WEADEMVRW.RDEN ..... DIPQDKA.LIVAERE.RSHFEFREK...

5d\_Leptospira\_interrogans\_HdaH ..... YEPSPMIFPISDEL ..... KAELDPENYLRAIDEAADEYRFQLSSPR

5d\_Leptospira\_brenneri\_HDAC ..... WEPGDHVLVPSERLTEYFASRVFSAKADEALRDLTN ..... QG.LVV.V

5e\_Archangium\_gephyra\_HDAC ..... WEPGDHVLVPSERLTEYFASRVFSAKADEALRDLTN ..... QG.LVV.V

5e\_Nannocystis\_exedens\_AcuC ..... WEPGDHVLVPSERLTEYFASRVFSAKADEALRDLTN ..... QG.LVV.V

5e\_Deltaproteobacteria\_bacterium\_HDAC ..... WEPGDHVLVPSERLTEYFASRVFSAKADEALRDLTN ..... QG.LVV.V

5f\_Micavibrio\_sp\_HDAC\_domain ..... WEPGDHVLVPSERLTEYFASRVFSAKADEALRDLTN ..... QG.LVV.V

5f\_Homo\_sapiens\_HDAC11 ..... WEPGDHVLVPSERLTEYFASRVFSAKADEALRDLTN ..... QG.LVV.V

5f\_Arabidopsis\_thaliana\_HDA2 ..... WEPGDHVLVPSERLTEYFASRVFSAKADEALRDLTN ..... QG.LVV.V

5g\_Bacteriovorax\_stolpii\_AcuC-like ..... WEPGDHVLVPSERLTEYFASRVFSAKADEALRDLTN ..... QG.LVV.V

5g\_Gracilinema\_caldarium\_HdaH ..... WEPGDHVLVPSERLTEYFASRVFSAKADEALRDLTN ..... QG.LVV.V

5g\_Bacteriovorax\_sp\_MedPE-SWde\_HDAC\_domain ..... WEPGDHVLVPSERLTEYFASRVFSAKADEALRDLTN ..... QG.LVV.V

**Supplementary Figure 19: Primary sequence alignment of selected bacterial deacylases of cluster 5 (UniProt accession numbers are shown).**

Show are the following sequences of the following deacylases representing enzymes of cluster 5 and the sub-clusters (code: sub-cluster, accession number/protein name/species): 5a, A0A385C7X8/HDAC/*Acinetobacter wuhouensis*; 5a, A0A3S0JDS2/HDAC/*Neisseriaceae bacterium*; 5a, A0A7X8CU14/HDAC/*Treponema sp.*; 5b, A0A395TF317HDAC/*Vibrio cholerae*; 5b, U2ZNB5/AcuC/*Pseudomonas alcaligenes* (strain ATCC 14909 / DSM 50342 / JCM 20561 / NBRC 14159 / NCIMB 9945 / NCTC 10367 / 1577); 5b, A0A960ZHD4/HDAC/*Leptospiraceae bacterium*; 5c, A0A2Z4RAM2/HDAC/*Moraxella bovis*; 5c, H8XRQ2/HDAC family/*Flavobacterium indicum* (strain DSM 17447 / CIP 109464 / GPTSA100-9); 5c, A0A2H0QAI6/HDAC/*Bdellovibrionales bacterium CG11\_big\_fil\_rev\_8\_21\_14\_0\_20\_38\_13*; 5d, I4B797/HDAC Superfamily/*Turneriella parva* (strain ATCC BAA-1111 / DSM 21527 / NCTC 11395 / H) (*Leptospira parva*); 5d, A0A098MZK6/HdaH/*Leptospira interrogans*; 5d, A0A2M9Y5D1/HDAC/*Leptospira brenneri*; 5e, A0A2W5V5Z1/HDAC/*Archangium gephyra*; 5e, A0A1I2D6R7/AcuC/*Nannocystis exedens*; 5e, A0A925AY58/HDAC/*Deltaproteobacteria bacterium*; 5f, A0A2D5Y199/HDAC domain/*Micavibrio sp.*; 5f, Q96DB2/HDAC11/*Homo sapiens*; 5f, Q944K3/HDA2/*Arabidopsis thaliana*; 5g, A0A2K9NTX8/AcuC like/*Bacteriovorax stolpii* (*Bdellovibrio stolpii*); 5g, F8F277/HdaH/*Gracilinema caldarium* (strain ATCC 51460 / DSM 7334 / H1) (*Treponema caldarium*); 5g, A0A1J5KZ05/HDAC domain/*Bacteriovorax sp.* MedPE-SWde All sequences were aligned using the T-COFFEE multiple sequence alignment server<sup>1</sup>. The important catalytic residues are highlighted. The secondary structure elements and numbering is shown for the deacylase shown at the top of the amino acid sequences above the sequence alignment. The alignment was created by ESPript version 3.0<sup>2</sup>.



*Mycoplana\_ramosa\_ApaH*

Mycoplana\_ramosa\_ApaH P F E
Pseudomonas\_aeruginosa\_ApaH2 C F E
Pseudomonas\_aeruginosa\_ApaH1 C F E
Pseudomonas\_sp\_M30-35\_ApaH C F E
Candidatus\_Scalindua\_brodac HDAC2 LAR... REAQEAIKMLTTRFAKTDTDTGYIDQVIESFRDDPVTF
Burkholderia\_pseudomallei\_ApaH PQ E
Ralstonia\_insidiola\_ApaH PQ E
Chloroflexi\_bacterium\_RBG\_16\_48\_8\_HdaH D E
Fervidobacterium\_pennivorans\_HDAC NP E N
Bordetella\_hinzii\_ApaH1 PNP D
Bordetella\_bronchiseptica\_253\_ApaH ST E
Spirochaetae\_bacterium\_HGW-Spirochaetae-5\_ApaH CMSDN E
Kosmotoga\_pacifica\_HDAC EN E
Chromatiales\_bacterium\_ApaH ST E
Micavibrio\_aeruginosavorus\_ApaH N F E
Laribacter\_hongkongensis\_ApaH C F E
Pseudomonas\_putida\_HDAC\_family PQ E
Bacteroidetes\_bacterium\_GWF2\_33\_16\_HDAC PDH KL
Lentisphaerae\_bacterium\_GWF2\_52\_8\_HDAC H AP

*Mycoplana\_ramosa\_ApaH*

Mycoplana\_ramosa\_ApaH AEWI LAA VK.EAGF
Pseudomonas\_aeruginosa\_ApaH2 ADMV LDR VK.AVGL
Pseudomonas\_aeruginosa\_ApaH1 ADTV LAR VK.SQNL
Pseudomonas\_sp\_M30-35\_ApaH ADHI LQR VK.DRNI
Candidatus\_Scalindua\_brodac HDAC2 PLRYI KAVKENRIIRDFNSFLAYTFVSPKHEIHVKE.ERGYFE
Burkholderia\_pseudomallei\_ApaH AARL VAA AF.AMGF.P
Ralstonia\_insidiola\_ApaH ARNL LQA AR.DLGF.T
Chloroflexi\_bacterium\_RBG\_16\_48\_8\_HdaH VEVLL QA F.SAA.G
Fervidobacterium\_pennivorans\_HDAC L.KLVL NY LQ.EN.F.Q
Bordetella\_hinzii\_ApaH1 LAGL REGVAA MG.Y.A
Bordetella\_bronchiseptica\_253\_ApaH ADRL LAA AQ.RRGH.E
Spirochaetae\_bacterium\_HGW-Spirochaetae-5\_ApaH PEYERESLLFYGNPYFLFDNLG IKKDLSSL.NDSRKI
Kosmotoga\_pacifica\_HDAC I.ESI RER ME.NF.FG
Chromatiales\_bacterium\_ApaH AQRL LAG VA.RCGL.E
Micavibrio\_aeruginosavorus\_ApaH V FF VR.DQIL.HRG
Laribacter\_hongkongensis\_ApaH ADMV REA V.DAA
Pseudomonas\_putida\_HDAC\_family IEPL LAV VN.KLGY.P
Bacteroidetes\_bacterium\_GWF2\_33\_16\_HDAC SGLGGAIY TR VR.EEAELLNANGL
Lentisphaerae\_bacterium\_GWF2\_52\_8\_HDAC GRGVGGALY ER VR.EEVLMKSKGL

*Mycoplana\_ramosa\_ApaH*

Mycoplana\_ramosa\_ApaH D DV.V.A.P ARH.GLE.TV
Pseudomonas\_aeruginosa\_ApaH2 G AV.R.A.P RDF.GLE.PI
Pseudomonas\_aeruginosa\_ApaH1 G EV.I.A.P KDF.GRE.PL
Pseudomonas\_sp\_M30-35\_ApaH G EI.R.E.P QDF.GRD.PI
Candidatus\_Scalindua\_brodac HDAC2 RPIRVETIRSVIRDVGGFVSTV REY.GE.K.WI
Burkholderia\_pseudomallei\_ApaH V.R.E.P DDF.GI.A.PI
Ralstonia\_insidiola\_ApaH I.A.Q.P EDH.GL.A.PL
Chloroflexi\_bacterium\_RBG\_16\_48\_8\_HdaH WD ST.L.Q.P T.DH.GL.G.PI
Fervidobacterium\_pennivorans\_HDAC A.A.I.Q.P F.EE.H.I
Bordetella\_hinzii\_ApaH1 I.H.A.P EDF.GL.Q.YL
Bordetella\_bronchiseptica\_253\_ApaH RV E ARDF.G.E.AI
Spirochaetae\_bacterium\_HGW-Spirochaetae-5\_ApaH FR AV.L.E.R KHERDVND.GLKKFISSMKGDPO.II
Kosmotoga\_pacifica\_HDAC YT IQ E SEY.HF.ESYI
Chromatiales\_bacterium\_ApaH V.V.T.P DEF.GA.S.PR
Micavibrio\_aeruginosavorus\_ApaH FS EI.I.A.P EEF.PA
Laribacter\_hongkongensis\_ApaH GF TDH.GKE.PI
Pseudomonas\_putida\_HDAC\_family L.F.E.P ADH.GL.A.PL
Bacteroidetes\_bacterium\_GWF2\_33\_16\_HDAC FF EC.LPDD.P ALCKDGDILLQNKRLAFYSEF.GA.R.PI
Lentisphaerae\_bacterium\_GWF2\_52\_8\_HDAC FF EC.LPDD.P LLCKSPLVLRQNAQRLKFYEKY.GA.R.PI

*Mycoplana\_ramosa\_ApaH*

Mycoplana\_ramosa\_ApaH LK.VHD.AG.YL.N.F
Pseudomonas\_aeruginosa\_ApaH2 RR.VHS.EG.FV.R.F
Pseudomonas\_aeruginosa\_ApaH1 LR.LHD.AA.YL.D.F
Pseudomonas\_sp\_M30-35\_ApaH QR.IHT.AE.YL.N.F
Candidatus\_Scalindua\_brodac HDAC2 L.S.VHD.KT.FV.H.Y
Burkholderia\_pseudomallei\_ApaH A.A.VHD.TH.YL.R.F
Ralstonia\_insidiola\_ApaH T.A.VHG.EP.YL.R.F
Chloroflexi\_bacterium\_RBG\_16\_48\_8\_HdaH L.D.VHD.SD.YV.D.F
Fervidobacterium\_pennivorans\_HDAC L.K.VHS.EK.YF.N.Y
Bordetella\_hinzii\_ApaH1 S.R.VHT.AR.YL.D.F
Bordetella\_bronchiseptica\_253\_ApaH L.AE.VHC.PR.YL.D.F
Spirochaetae\_bacterium\_HGW-Spirochaetae-5\_ApaH R.KSVHSNDDFNHYSFTVPADRKIPLLYNDGHEIHHIRDKG.YV.ESPVRIKSI
Kosmotoga\_pacifica\_HDAC Y.L.IHE.PE.YV.SW
Chromatiales\_bacterium\_ApaH A.A.VHD.AT.YL.D.F
Micavibrio\_aeruginosavorus\_ApaH DIFSR.VHD.PR.YV.A.F
Laribacter\_hongkongensis\_ApaH LA.VHR.EN.YV.R.F
Pseudomonas\_putida\_HDAC\_family A.A.VHG.QA.YL.D.F
Bacteroidetes\_bacterium\_GWF2\_33\_16\_HDAC ANTLYEMK.VNP.ED.DCPP.YL.VYDGLNKEFTLPAK
Lentisphaerae\_bacterium\_GWF2\_52\_8\_HDAC I.NTKYETPVKEGGDNAP.YLVVDNLGTERS.F.KKS

*Mycoplana\_ramosa\_ApaH* ..... 000 ..... 0.000 ..... 00.....

*Mycoplana\_ramosa\_ApaH* ..... IET ..... A.WDR ..... WK.....

*Pseudomonas\_aeruginosa\_ApaH2* ..... IQN ..... A.WQD ..... WL.....

*Pseudomonas\_aeruginosa\_ApaH1* ..... IQG ..... A.WAR ..... WT.....

*Pseudomonas\_sp\_M30-35\_ApaH* ..... FEG ..... A.WAR ..... WQ.....

*Candidatus\_Scalindua\_brodac\_HDAC2* ..... LRT ..... V ..... .....

*Burkholderia\_pseudomallei\_ApaH* ..... LET ..... V.HRE ..... WK.....

*Ralstonia\_insidiosa\_ApaH* ..... IQD ..... A.HTD ..... WR.....

*Chloroflexi\_bacterium\_RBG\_16\_48\_8\_HdaH* ..... IQT ..... V.YEK ..... NK.....

*Fervidobacterium\_pennivorans\_HDAC* ..... IQV ..... V ..... K.....

*Bordetella\_hinzii\_ApaH1* ..... IEL ..... A.HAL ..... WS.....

*Bordetella\_bronchiseptica\_253\_ApaH* ..... LKN ..... G.YAQ ..... WR.....

*Spirochaetae\_bacterium\_HGW-Spirochaetae-5\_ApaH* ..... LK ..... VIEKSELFIKSKTSRYSERHITAVHDKDFV.....

*Kosmotoga\_pacifica\_HDAC* ..... LKK ..... K.SNE ..... .....

*Chromatiales\_bacterium\_ApaH* ..... LDC ..... A.FSE ..... WS.....

*Micavibrio\_aeruginosavorus\_ApaH* ..... LKE ..... G.YRR ..... WE.....

*Laribacter\_hongkongensis\_ApaH* ..... LET ..... F.WER ..... WS.....

*Pseudomonas\_putida\_HDAC\_family* ..... LGS ..... A.YQQ ..... WH.....

*Bacteroidetes\_bacterium\_GWF2\_33\_16\_HDAC* TLKGIKAI LERKYGDYCPESYIKMVVNSVKDNPFLLRQPK..... YV.....

*Lentisphaerae\_bacterium\_GWF2\_52\_8\_HDAC* RMRQIVKAI LERKYPDL ..... NEE ..... YVDMVINSISDDP

*Mycoplana\_ramosa\_ApaH* ..... 0  
80

*Mycoplana\_ramosa\_ApaH* ..... AAG.Y ..... K ..... G ..... EA ..... I.....

*Pseudomonas\_aeruginosa\_ApaH2* ..... ATG.R ..... S ..... H ..... DM ..... L.....

*Pseudomonas\_aeruginosa\_ApaH1* ..... AEG.H ..... S ..... G ..... DL ..... V.....

*Pseudomonas\_sp\_M30-35\_ApaH* ..... EQD.G ..... T ..... G ..... DL ..... L.....

*Candidatus\_Scalindua\_brodac\_HDAC2* ..... CAS.L ..... RQG ..... RP ..... VY.....

*Burkholderia\_pseudomallei\_ApaH* ..... AM.PE ..... DW ..... GD ..... .....

*Ralstonia\_insidiosa\_ApaH* ..... RL.PE ..... DW ..... GD ..... .....

*Chloroflexi\_bacterium\_RBG\_16\_48\_8\_HdaH* ..... SY.Q ..... LA ..... .....

*Fervidobacterium\_pennivorans\_HDAC* ..... SQE.V ..... E ..... D ..... EY ..... L.....

*Bordetella\_hinzii\_ApaH1* ..... RL.P ..... NA ..... GP ..... .....

*Bordetella\_bronchiseptica\_253\_ApaH* ..... ALPGA ..... SQ ..... EI ..... .....

*Spirochaetae\_bacterium\_HGW-Spirochaetae-5\_ApaH* ..... KFF.K ..... TA ..... SA ..... SV.....

*Kosmotoga\_pacifica\_HDAC* ..... IESG.K ..... .....

*Chromatiales\_bacterium\_ApaH* ..... AL.PE ..... ST ..... PE ..... A.....

*Micavibrio\_aeruginosavorus\_ApaH* ..... E ..... Q ..... G ..... ESHML.....

*Laribacter\_hongkongensis\_ApaH* ..... RPS.R ..... RSATGRDY ..... DA ..... L.....

*Pseudomonas\_putida\_HDAC\_family* ..... EV.PE ..... DW ..... GD ..... .....

*Bacteroidetes\_bacterium\_GWF2\_33\_16\_HDAC* ..... KSR.K.ISSINKNIKEKNKILLIVNNKHAIHHIKERGYVESPVRVES.....

*Lentisphaerae\_bacterium\_GWF2\_52\_8\_HDAC* VQLRPFKYVSN.KDIEPISRRLPVDTLIPLVYNTQIHVHHVQERG..... YVESPVVETMLS

*Mycoplana\_ramosa\_ApaH*

*Mycoplana\_ramosa\_ApaH* ..... A.....

*Pseudomonas\_aeruginosa\_ApaH2* ..... P.....

*Pseudomonas\_aeruginosa\_ApaH1* ..... S.....

*Pseudomonas\_sp\_M30-35\_ApaH* ..... P.....

*Candidatus\_Scalindua\_brodac\_HDAC2* ..... P.....

*Burkholderia\_pseudomallei\_ApaH* ..... E ..... A.....

*Ralstonia\_insidiosa\_ApaH* ..... E ..... V.....

*Chloroflexi\_bacterium\_RBG\_16\_48\_8\_HdaH* ..... .....

*Fervidobacterium\_pennivorans\_HDAC* ..... P.....

*Bordetella\_hinzii\_ApaH1* ..... E ..... V.....

*Bordetella\_bronchiseptica\_253\_ApaH* ..... T ..... P.....

*Spirochaetae\_bacterium\_HGW-Spirochaetae-5\_ApaH* ..... P.AGV5

*Kosmotoga\_pacifica\_HDAC* ..... E.....

*Chromatiales\_bacterium\_ApaH* ..... V.....

*Micavibrio\_aeruginosavorus\_ApaH* ..... P.....

*Laribacter\_hongkongensis\_ApaH* ..... P.....

*Pseudomonas\_putida\_HDAC\_family* ..... V.....

*Bacteroidetes\_bacterium\_GWF2\_33\_16\_HDAC* ..... IQRELDKTFGFHQDNALEYPERFIL

*Lentisphaerae\_bacterium\_GWF2\_52\_8\_HDAC* ALNKTGLFNNIRERHFAEHHTSLHDRDFVDYLLKVCSAI ..... PKES

*Mycoplana\_ramosa\_ApaH*

90 T ..... T 100 000000 TT  
110

*Mycoplana\_ramosa\_ApaH* ..... TS.FP...VR ..... RTSPRI P ..... TDIEGQI GYYCN.AAETA

*Pseudomonas\_aeruginosa\_ApaH2* ..... IA.WP...TR ..... RLRQTE P ..... DNIDGRL GYYSF.DAGA P

*Pseudomonas\_aeruginosa\_ApaH1* ..... TT.FPGRRLR ..... RDGPI P ..... TALMGEL GYYSF.DTEA P

*Pseudomonas\_sp\_M30-35\_ApaH* ..... YT.WP...AR ..... TSLQRL P ..... TSLHGQL GYYSF.DAGA P

*Candidatus\_Scalindua\_brodac\_HDAC2* ..... DT.FPI ..... R ..... RPDNR P ..... KELPQA GYYC...IDTG

*Burkholderia\_pseudomallei\_ApaH* ..... MS.NIF ..... V ..... REPNA.L ..... RGVLAQAARHLA.DGSC P

*Ralstonia\_insidiosa\_ApaH* ..... MS.NIF ..... V ..... REPNA.L ..... RGVLAQAARYLA.DGSC P

*Chloroflexi\_bacterium\_RBG\_16\_48\_8\_HdaH* ..... VFTWA ..... FATR ..... YTGKH ..... P ..... KHFLGQL GYYAF.GWGT P

*Fervidobacterium\_pennivorans\_HDAC* ..... EV.FV ..... D ..... QIFDT.G ..... TPIKKEI.FF...AAKRA

*Bordetella\_hinzii\_ApaH1* ..... VP.NAH ..... P ..... RRPDA.P ..... PYPRGIVGRA GFHMY.DLACA

*Bordetella\_bronchiseptica\_253\_ApaH* ..... HV.HPP ..... R ..... EESGY.P ..... VSIIGRA GFHT...ADTS

*Spirochaetae\_bacterium\_HGW-Spirochaetae-5\_ApaH* LYPDTF.PIR ..... KN ..... VKP ..... P ..... KKLVSRA GYYCI.DIYS P

*Kosmotoga\_pacifica\_HDAC* ..... VF...G ..... H ..... .....

*Chromatiales\_bacterium\_ApaH* ..... IA.NVH ..... P ..... MHRRTNY.P ..... HSIIGRA GWHMA.DTAC P

*Micavibrio\_aeruginosavorus\_ApaH* ..... SV.FN...LQ ..... .....

*Laribacter\_hongkongensis\_ApaH* ..... LI.WP...TR ..... CFRQVE P ..... EDIDGQL GYFSM.DAGT P

*Pseudomonas\_putida\_HDAC\_family* ..... MS.NIY ..... I ..... MS.NIY ..... REGNP.L ..... RGLGKTARYLA.DGSC P

*Bacteroidetes\_bacterium\_GWF2\_33\_16\_HDAC* KVHDRD.YVN...YFKVKCKNLSKGGKSVYPYVFP.IRNGTKA...P ..... KELSVA GYYCF.DTFT P

*Lentisphaerae\_bacterium\_GWF2\_52\_8\_HDAC* VYPYVF.PI ..... RN ..... NTRP ..... P ..... KDLPMA GYYCI.DTFT P

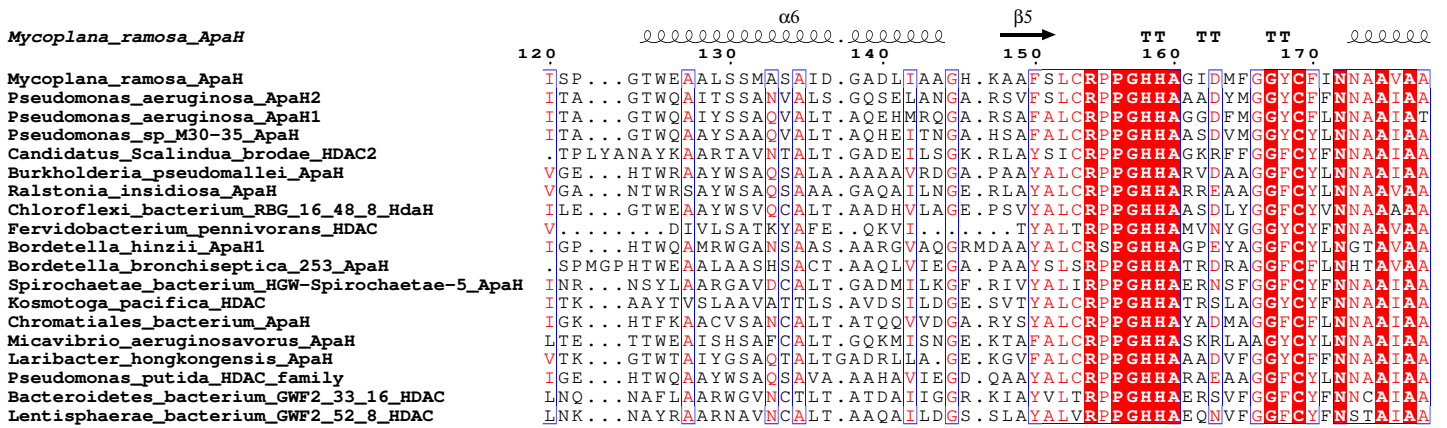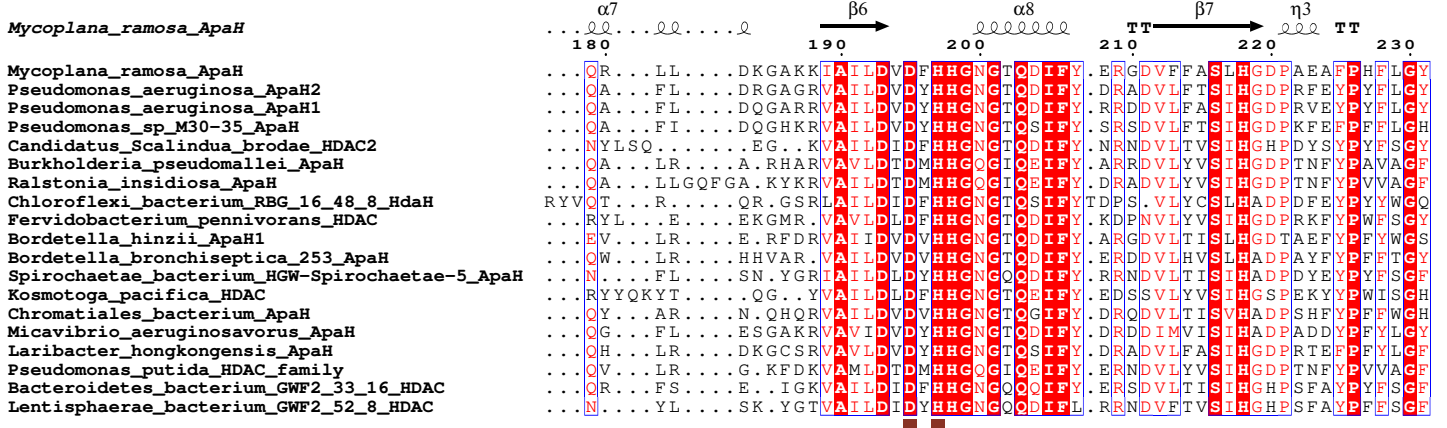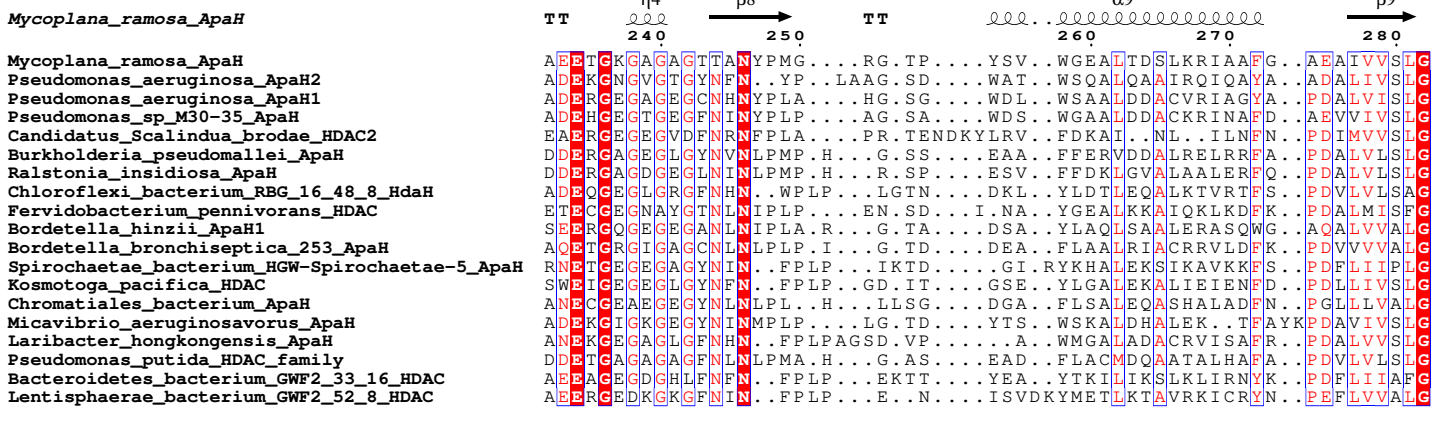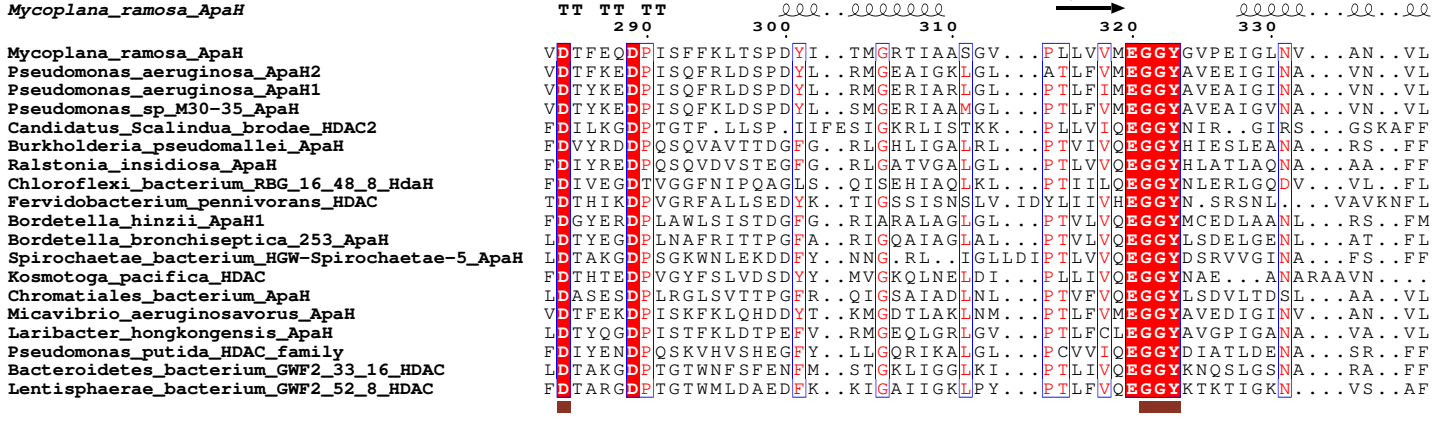



|                                                       |                                                           |
|-------------------------------------------------------|-----------------------------------------------------------|
| <i>Mycoplana_ramosa_ApaH</i>                          | . Q Q . . . . . Q . Q<br>3 4 0                            |
| <i>Mycoplana_ramosa_ApaH</i>                          | . K G . . . . . V . A . G . . . . .                       |
| <i>Pseudomonas_aeruginosa_ApaH2</i>                   | . Q G . . . . . F . E . G V . . . . . H R . . . . .       |
| <i>Pseudomonas_aeruginosa_ApaH1</i>                   | . Q G . . . . . Y . E . G A . . . . . A R . . . . .       |
| <i>Pseudomonas_sp_M30-35_ApaH</i>                     | . E G . . . . . F . E . N V . . . . . C R P N N S K K D A |
| <i>Candidatus_Scalindua_brodae_HDAC2</i>              | . K G . . . . . C . N . E N R T . . . . .                 |
| <i>Burkholderia_pseudomallei_ApaH</i>                 | . G G . . . . . F G . A L R G . . . . .                   |
| <i>Ralstonia_insidiosa_ApaH</i>                       | . S G . . . . . L Q . S P H Q P A G . . . . .             |
| <i>Chloroflexi_bacterium_RBG_16_48_8_HdaH</i>         | . S H . . . . . F I Q S N R T . . . . .                   |
| <i>Fervidobacterium_pennivorans_HDAC</i>              | . A G . . . . . L L . G E . . . . .                       |
| <i>Bordetella_hinzii_ApaH1</i>                        | . T N . . . . . F E . A A H R V E R G . . . . .           |
| <i>Bordetella_bronchiseptica_253_ApaH</i>             | . D G F C Q H H R P T A . T L R . . . . .                 |
| <i>Spirochaetae_bacterium_HGW-Spirochaetae-5_ApaH</i> | . Q G . . . . . L Y E . G E Y G R K N Q . . . . .         |
| <i>Kosmotoga_pacifica_HDAC</i>                        | . F . . . . . F . S . G M L K . . . . .                   |
| <i>Chromatiales_bacterium_ApaH</i>                    | . E G . . . . . V L . S . . . . .                         |
| <i>Micavibrio_aeruginosavorus_ApaH</i>                | . T G . . . . . F . L . N R . . . . .                     |
| <i>Laribacter_hongkongensis_ApaH</i>                  | . S G . . . . . Y . D . S T . . . . . A H G . . . . .     |
| <i>Pseudomonas_putida_HDAC_family</i>                 | . A G . . . . . M A . A . . . . .                         |
| <i>Bacteroidetes_bacterium_GWF2_33_16_HDAC</i>        | . S G . . . . . F Y . T . . . . . A N N . . . . .         |
| <i>Lentisphaerae_bacterium_GWF2_52_8_HDAC</i>         | F R G . . . . . V W E . G . . . . . S F R . . . . .       |



**Supplementary Figure 20: Primary sequence alignment of selected bacterial deacylases of cluster 4 (UniProt accession numbers are shown).**

Show are the following sequences of the following deacylases representing enzymes of cluster 4 and the sub-clusters (code: sub-cluster, accession number/protein name/species): 4, Q48935/ApaH/*Mycoplana ramosa* (*Mycoplana bullata*); 4, Q916H0/ApaH2/*Pseudomonas aeruginosa* (strain ATCC 15692 / DSM 22644 / CIP 104116 / JCM 14847 / LMG 12228 / 1C / PRS101 / PAO1); 4, Q913T5/ApaH1/*Pseudomonas aeruginosa* (strain ATCC 15692 / DSM 22644 / CIP 104116 / JCM 14847 / LMG 12228 / 1C / PRS 101 / PAO1); 4, A0A1Y0KY79/ApaH/*Pseudomonas* sp. M30-35; 4, A0A0B0EJX1/HdaC2/*Candidatus Scalindua brodae*; 4, Q3JUN4/ApaH/*Burkholderia pseudomallei* (strain 1710b); 4, A0A191ZTI7/ApaH/*Ralstonia insidiosa*; 4, A0A1F8P1D9/HdaH/*Chloroflexi bacterium* RBG\_16\_48\_8; 4, A0A172T1R4/HDAC/*Fervidobacterium pennivorans*; 4, A0A0H4W2H7/ApaH1/*Bordetella hinzii*; 4, A0A0C6P6V8/ApaH/*Bordetella bronchiseptica* 253; 4, A0A2N1RQT6/ApaH/*Spirochaetae bacterium* HGW-Spirochaetae-5; 4, A0A0G2Z8U2/HDAC/*Kosmotoga pacifica*; 4, A0A1E5A0H0/ApaH/*Chromatiales bacterium* (ex *Bugula neritina* AB1); 4, A0A2W5MSH4/ApaH/*Micavibrio aeruginosavorus*; 4, A0A248LJH0/ApaH/*Laribacter hongkongensis*; 4, A0A1L7NGC7/HDAC family/*Pseudomonas putida* (*Arthrobacter siderocapsulatus*); 4, A0A1F3IP43/HDAC/*Bacteroidetes bacterium* GWF2\_33\_16; 4, A0A1G0YY82/HDAC/*Lentisphaerae bacterium* GWF2\_52\_8All sequences were aligned using the T-COFFEE multiple sequence alignment server<sup>1</sup>. The important catalytic residues are highlighted. The secondary structure elements and numbering is shown for the deacylase shown at the top of the amino acid sequences above the sequence alignment. The alignment was created by ESPript version 3.0<sup>2</sup>.

Legionella\_cherrii\_ApaH

1 10
MR...HKY...FKK.EKVS.P
MDMAK.DKGF...FKK.AKME.K
MMM.K...HKY...FFR.HMTS.T
MKL...EELLYQ...FKT.HA.V.L...AEK...
MPR...LF...KPLPSTP.A...LKK.LQ...
MDE...KCKKWL...LT.IDCC.M...KEA...
MKN...GF...FKN.DKIK.A...
MGR...DEKKRI...YNT.RRMPKPTTEEVEEKVKRKHVTSASLNLQEEENELL...SNQ.DE...KPKPKLKTREPS
MPR...TF...FEK.HSPS.N...LRS...ELLA.LNRLF.KG...NKFLSIQTIE...E...
MKG...TL...FTVVRGND.K...ARK...NALIDKIKRVQ.QEYKELQKGTVNLD...
MN...RKF...FIE.PSL.S.L...LEK...RILC.CITNI.SS...SNPEEIQTSS...
MGLSQCXSSSF...EPQ

Legionella\_cherrii\_ApaH

ES
DV
Q.LT
NRLT
R.NY
VKNKKNKREATRTRKRRETTGAMHLETESKSTANTQYPEESIVKKTQAQS.KRSLKVNDSIGFFSVKKIHKAKNKDIEHQQT
SL...TF...NEYK...TLVSTYIQSPNYSKLKPVIQRVANNILNK...IN...E...
AF...CDFK...NKLEDEIENDSFYKLLPTNFNRSIHHMREE...LE...QQFP
RL...KDYL...LELKNYTQDTEFANIGLGLKREALKLLQ

Legionella\_cherrii\_ApaH

20 30 40 50 60
HK.EKNQECLIQIPSAKD...IQQM...HGM...AGAD...EDQFERL...KHM...TQVIATTQSK
NKRL...VT.PYSEECALIQIPSEIDNEQMQRMPAGGE...EDQYLR...KHM...SALIKKY...
HK.EKNQECCIQIPSAKDIEQM...HGM...AGAD...EDQLK...KHM...VVRVIEDYQST
ELDLV...KK.KWPTAITYQAPAYDEILAMRGM...YAGGK...QDLAR...LKL...LVKTLKTQ...
LET.LAPPLM...VOIP...SATD...LTYM...RGM...IAGTD...EDQAE...RL...GNM...TRLLHNF...
KLFMS...EK.MDRYGITY...VOIP...CKRD...IDAM...KGF...CAGYK...EDQQR...RL...QKI...SRTLAAR...
KTSDS...CT.MNTDDLK...IQIL...LADSD...ITET...RYM...PAGAD...EDQSL...RL...KNM...SKVVKEY...
CT.MNTDDLK...IQIL...LADSD...ITET...RYM...PAGAD...EDQSL...RL...KNM...SKVVKEY...
ALSSIEDDK...EL.YDLSECY...VOIP...SDTD...FVTY...RGM...CAAAEAKKT...EDQQR...RL...SKI...IDVVRKH...
ALSSIEDDK...EL.YDLSECY...VOIP...SHNALAQ...MHM...PAGST...EDQQT...RL...MHM...SQVLGNC...
IA.AEPGDLPVLT...IQHP...SND...DLAN...MHG...M...FAGES...EDQAT...RL...GHM...TLKIHESLDN
MN.SEPSECF...IQIP...SEQH...VEQM...KGM...PAGGI...EDQNI...RL...LIH...MNSAIRKQKK
PSPINFS...IQIP...AAE...H...LTW...MRD...M...FAGGA...EDQCM...RL...SNM...VAKINELHQQ

Legionella\_cherrii\_ApaH

70 80 90 100 110 120 130
DPSLPVVT...TD...RV...EL...PE...HW...NQ...LFA...AAM...KKG...DEN...V...ALT...IF...AE...F...PE...ED...Q...IL...QA...LL...AV...H...TS...E...Y...L...L...Q...Q...I...IR...DC...IQ...QA...
TD...Q...ET...RL...PY...Y...W...LD...LFA...A...I...DE...G...D...TP...KA...HA...LF...H...LL...P...OD...DI...LR...AL...RA...V...H...SE...D...Y...L...Y...Q...L...IK...YC...IQ...AK...H...
TD...V...VA...L...P...TH...W...NQ...LFA...A...M...K...K...G...D...AE...AP...LT...LF...AQ...F...PE...ND...E...IL...RA...LL...AV...H...TS...E...Y...L...L...Q...Q...I...IR...DC...IQ...QA...
SH...H...W...ID...RL...P...W...LV...L...C...Q...AI...R...SR...E...IT...LA...KA...AF...DA...I...PE...DN...P...VL...K...AL...L...V...H...TK...AY...L...V...SL...V...K...TC...A...A...L...AP...
TD...D...AL...F...L...NP...S...W...NE...LFA...A...I...R...R...G...D...TP...RI...A...AR...L...F...SE...I...P...DD...P...IL...K...P...LL...AV...H...TR...S...Y...L...L...Q...Q...I...IR...DC...IQ...QA...
CE...K...W...LD...TL...P...WE...I...LFA...A...I...R...R...G...D...TP...RI...A...AR...L...F...SE...I...P...DD...P...IL...K...P...LL...AV...H...TR...S...Y...L...L...Q...Q...I...IR...DC...IQ...QA...
TE...Q...CE...L...SN...K...W...LK...LFA...A...I...R...R...G...D...TP...RI...A...AR...L...F...SE...I...P...DD...P...IL...K...P...LL...AV...H...TR...S...Y...L...L...Q...Q...I...IR...DC...IQ...QA...
SD...H...NN...L...PE...Y...W...SO...LFA...A...I...R...R...G...D...TP...RI...A...AR...L...F...SE...I...P...DD...P...IL...K...P...LL...AV...H...TR...S...Y...L...L...Q...Q...I...IR...DC...IQ...QA...
TQ...Q...V...S...LA...Y...W...LD...LFA...A...I...R...R...G...D...TP...RI...A...AR...L...F...SE...I...P...DD...P...IL...K...P...LL...AV...H...TR...S...Y...L...L...Q...Q...I...IR...DC...IQ...QA...
TED...V...S...L...P...V...IT...TD...ED...VS...LA...Y...W...LD...LFA...A...I...R...R...G...D...TP...RI...A...AR...L...F...SE...I...P...DD...P...IL...K...P...LL...AV...H...TR...S...Y...L...L...Q...Q...I...IR...DC...IQ...QA...
TD...D...DL...K...L...SP...S...W...EV...E...F...ER...LI...Q...S...NA...N...Q...KD...IL...KE...E...TR...L...ME...Q...DD...LV...QT...I...SA...V...H...SK...K...Y...L...R...Q...V...L...Q...WT...L...S...A...R...N...

Legionella\_cherrii\_ApaH

140 150 160 170 180 190 200 210
KGW...K...Q...L...NS...D...I...L...I...TP...G...TF...E...V...L...I...K...D...I...S...M...T...L...F...H...S...K...K...V...H...F...S...F...G...L...P...T...H...H...A...F...A...D...E...G...S...G...F...C...I...L...N...K...S...A...V...L...K...H...M...Q...R...N...T...K...P...L...K...H...
FG...F...K...Q...L...NA...D...L...V...V...TP...K...TF...E...I...L...I...R...D...C...A...T...L...F...N...P...A...K...A...H...F...S...F...G...L...P...S...H...H...A...Y...T...O...M...G...S...G...F...C...I...L...N...K...T...A...M...L...M...K...Q...A...E...L...S...S...A...Q...E...P...K...F...
KG...W...K...Q...L...SP...D...I...L...I...TP...G...TF...E...V...L...I...K...D...I...A...M...T...L...F...H...F...G...K...V...H...F...S...F...G...L...P...S...H...H...A...Y...S...D...E...G...S...G...F...C...I...L...N...K...S...A...I...L...I...K...Y...L...Q...S...L...S...S...K...P...L...K...H...
D...I...D...I...L...C...G...H...L...TF...E...V...L...I...H...E...L...L...T...I...E...Q...R...Q...D...Q...F...N...F...C...F...G...L...P...T...H...H...A...Y...R...D...R...G...A...G...F...C...I...L...N...K...L...A...V...M...A...Y...E...E...L...T...A...D...A...F...H...T...
ND...D...V...V...V...TP...K...TF...E...L...I...R...D...L...A...T...S...I...L...I...P...A...P...V...C...F...S...F...G...L...P...G...H...H...A...F...S...D...R...A...N...G...F...C...I...L...N...K...I...A...V...M...M...Q...H...M...A...N...N...S...P...A...L...K...F...
D...V...V...C...G...R...L...TF...E...V...L...I...Q...D...L...I...T...I...T...Q...R...R...A...I...N...V...C...F...G...L...P...T...H...H...A...Y...R...E...A...A...G...F...C...I...N...K...T...A...V...M...V...Y...E...Q...L...M...A...S...K...P...F...K...A...
NS...D...I...V...I...TP...K...TF...E...I...L...M...K...D...C...A...L...T...M...S...T...K...A...T...F...S...F...G...L...P...T...H...H...A...Y...S...E...T...G...T...G...F...C...V...L...N...K...T...A...L...L...I...K...H...A...E...L...T...S...S...K...P...L...Q...Y...D...
D...T...D...I...H...I...N...Q...TF...E...V...L...I...K...D...I...A...T...I...E...G...F...K...Q...H...N...M...I...F...G...I...G...L...P...T...H...H...A...Y...R...E...K...A...A...G...F...C...I...N...K...V...A...V...L...I...H...Y...F...G...H...V...N...N...
NS...D...I...V...I...TP...G...TF...E...V...L...I...D...L...A...T...T...L...N...P...S...K...M...I...F...S...F...G...L...P...T...H...H...A...Y...H...D...E...G...S...G...F...C...I...N...K...T...A...V...L...M...K...Y...E...T...V...H...A...E...P...L...H...Y...
ND...I...V...Y...TP...G...TF...E...L...I...R...D...L...A...T...T...L...F...C...P...T...P...I...C...I...S...F...G...L...P...T...H...H...A...T...G...S...R...A...S...G...F...C...H...L...N...K...T...A...V...L...I...D...F...L...H...K...T...S...S...E...P...L...S...F...
NA...D...I...L...I...TP...H...TF...E...L...I...K...D...I...A...T...T...L...M...H...P...A...K...C...Y...F...S...F...G...L...P...T...H...H...A...F...S...R...E...S...S...G...F...C...I...N...K...I...A...I...L...I...K...N...A...E...L...T...H...P...N...P...L...K...H...
D...L...R...F...N...R...Y...TF...E...L...I...R...D...L...F...T...T...L...N...N...P...A...K...F...L...C...S...F...G...L...P...S...H...H...A...F...A...D...G...G...S...G...F...C...I...L...D...K...T...S...I...W...L...T...S...Y...L...Q...V...K...P...Q...A...M...V...

*Legionella\_cherrii\_ApaH*  $\beta 6$   $\alpha 10$   $\beta 7$   $\alpha 11$   $\beta 8$   $\beta 9$   $\beta 10$   
 220 230 240 250 260 270 280  
*Legionella\_cherrii\_ApaH* IIVCGHDVNRDNGICDILMNSAA..DMDICHDVFD<sup>240</sup>DSRVYFYQDEDEYITELFNKCGKDE...GQNIQS<sup>260</sup>QRGGLDYFV<sup>280</sup>VNI  
*Legionella\_pneumophila\_ApaH* VIIGTDVNRDNGICDILRHSFS..HLSICHDVFD<sup>240</sup>DSRVYFYQDFAYINNEFNSEGVDI...GKNIHV<sup>260</sup>WHHNNLN<sup>280</sup>YAV<sup>280</sup>VDL  
*Legionella\_bozemaniae\_ApaH* IIVGTDVNRDNGICDVLWNSAS..DMDICHDVFD<sup>240</sup>DSRVYFYQDDAFITEAFQKSGEDI...GQKIHM<sup>260</sup>WQRGNLE<sup>280</sup>YAV<sup>280</sup>VDL  
*Legionella\_erythra\_ApaH* VIIGTDINRDNGICNSVLM<sup>230</sup>MAETT..TQSFTHIDIY<sup>240</sup>DSRVYFYQDDGVLQ<sup>260</sup>ERMG...API...EEHGRV<sup>280</sup>WQKGNKC<sup>280</sup>YHS<sup>280</sup>VDL  
*Legionella\_geestiana\_ApaH* IIVIGTDVNRDNGICNVLR<sup>230</sup>REKLS..HLDICHDVFD<sup>240</sup>DSRVYFYQD<sup>260</sup>GSMQID<sup>260</sup>QEF<sup>260</sup>GVRK<sup>260</sup>PT...APAYNT<sup>280</sup>WKQGN<sup>280</sup>YV<sup>280</sup>YAD<sup>280</sup>DL  
*Legionella\_spiritensis\_ApaH* IIVIGTDVNRDNGISAILMGDDF..KQNLHL<sup>240</sup>DAY<sup>240</sup>DSRVYFYWH<sup>260</sup>HEKQ<sup>260</sup>INEI<sup>260</sup>IGCE<sup>260</sup>.SYS...EPGVSV<sup>280</sup>W<sup>280</sup>SKGKR<sup>280</sup>Y<sup>280</sup>LG<sup>280</sup>IDL  
*Legionella\_waltersii\_ApaH* MVVGTDDVNRDNGICDVLRRQFS..HLPICHDVFD<sup>240</sup>DSRVYFYQNAEDINLEFSTKGT<sup>260</sup>TTT...QQKI<sup>280</sup>QKW<sup>280</sup>SSDK<sup>280</sup>YD<sup>280</sup>YFM<sup>280</sup>VDL  
*Legionella\_busanensis\_ApaH* VICGTDVNEEDNGICRNTLSTSNF<sup>230</sup>S<sup>230</sup>KSR<sup>230</sup>TI<sup>230</sup>LH<sup>230</sup>LS<sup>230</sup>Y<sup>230</sup>DSRVYFY<sup>240</sup>Y<sup>240</sup>ASGN<sup>240</sup>V<sup>240</sup>KYD<sup>240</sup>K...VINE<sup>260</sup>EQ<sup>260</sup>Y<sup>260</sup>I<sup>260</sup>L<sup>260</sup>FL<sup>260</sup>Q<sup>260</sup>L  
*Legionella\_moravica\_ApaH* IIVGTDVNRDNGICDILRQTSS..HMNICHDVFD<sup>240</sup>DSRVYFYQNHLDINKEFNLTGTEV...GEQIK<sup>260</sup>Y<sup>260</sup>W<sup>260</sup>KHNN<sup>260</sup>LD<sup>260</sup>Y<sup>260</sup>AV<sup>260</sup>VDL  
*Legionella\_sp\_ApaH* FIIIGTDVNRDNGICQIL<sup>230</sup>RTKQT..EAPVCHIDI<sup>240</sup>F<sup>240</sup>DSRVYFYQNFNDITMEFTQ.SPDI...APNMAL<sup>260</sup>W<sup>260</sup>KEGN<sup>260</sup>Y<sup>260</sup>E<sup>260</sup>Y<sup>260</sup>MA<sup>260</sup>IDL  
*Legionella\_antarctica\_ApaH* IIVIGTDVNRDNGISAVLRESFS..CLD<sup>230</sup>ICHD<sup>240</sup>IF<sup>240</sup>DSRVYFYQH<sup>260</sup>DHSF<sup>260</sup>I<sup>260</sup>EY<sup>260</sup>E<sup>260</sup>F<sup>260</sup>QTQ<sup>260</sup>GKAE...QQIK<sup>280</sup>S<sup>280</sup>W<sup>280</sup>HQ<sup>280</sup>NQ<sup>280</sup>MD<sup>280</sup>Y<sup>280</sup>AV<sup>280</sup>VDL  
*Legionella\_sp\_HdaH* LVIIGTDINRDNGISANLQ<sup>230</sup>KN..AAQ<sup>230</sup>Y<sup>230</sup>HL<sup>230</sup>DL<sup>230</sup>F<sup>230</sup>DSRVYFYQ<sup>240</sup>GS<sup>240</sup>AE<sup>240</sup>IK<sup>240</sup>KF<sup>240</sup>NQ<sup>240</sup>DEVK<sup>260</sup>V<sup>260</sup>GV<sup>260</sup>ET<sup>260</sup>QAVN<sup>260</sup>V<sup>260</sup>Y<sup>260</sup>VQ<sup>260</sup>GCLT<sup>280</sup>Y<sup>280</sup>AV<sup>280</sup>IDL

*Legionella\_cherrii\_ApaH*  $\alpha 12$   $\beta 11$   $\alpha 13$   $\beta 12$   
 290 300 310 320 330 340  
*Legionella\_cherrii\_ApaH* S...RTR...K.PGLVHPALVFAIEK<sup>300</sup>MEEQIEQAK.INHQV<sup>310</sup>AL<sup>310</sup>LP<sup>310</sup>T<sup>310</sup>GW<sup>310</sup>DS<sup>310</sup>HEE<sup>310</sup>ET<sup>310</sup>AY<sup>310</sup>CG<sup>310</sup>K<sup>310</sup>Y<sup>310</sup>VDG...  
*Legionella\_pneumophila\_ApaH* S...LTSR...K.SVGVHPALVFALEQL<sup>300</sup>KESIREAK.AKGQ<sup>310</sup>IAL<sup>310</sup>LP<sup>310</sup>T<sup>310</sup>GW<sup>310</sup>DS<sup>310</sup>HEE<sup>310</sup>ET<sup>310</sup>AY<sup>310</sup>CG<sup>310</sup>K<sup>310</sup>F<sup>310</sup>VNG...  
*Legionella\_bozemaniae\_ApaH* S...LTLR...K.PSLVHPALVFAIEK<sup>300</sup>IEEQIEQAK.TNHQV<sup>310</sup>AL<sup>310</sup>LP<sup>310</sup>T<sup>310</sup>GW<sup>310</sup>DS<sup>310</sup>HEE<sup>310</sup>ET<sup>310</sup>AY<sup>310</sup>CG<sup>310</sup>K<sup>310</sup>Y<sup>310</sup>VDG...  
*Legionella\_erythra\_ApaH* A...LCSR...Q.RRGC<sup>300</sup>HALHYALEALE<sup>310</sup>TLLVNA.KKKEN<sup>310</sup>VML<sup>310</sup>LP<sup>310</sup>T<sup>310</sup>GW<sup>310</sup>DS<sup>310</sup>HEE<sup>310</sup>ET<sup>310</sup>AY<sup>310</sup>CG<sup>310</sup>KE<sup>310</sup>IGK...D  
*Legionella\_geestiana\_ApaH* S...LQETQKSPAN.PGMLHPALIDFAV<sup>300</sup>TKAQEEINRAI.RQGK<sup>310</sup>VALL<sup>310</sup>LP<sup>310</sup>T<sup>310</sup>GW<sup>310</sup>DS<sup>310</sup>SH<sup>310</sup>CK<sup>310</sup>ET<sup>310</sup>AD<sup>310</sup>CS<sup>310</sup>K<sup>310</sup>M<sup>310</sup>FEH...  
*Legionella\_spiritensis\_ApaH* S...RHAR...KNETDYHPALLLIL<sup>300</sup>LQK<sup>300</sup>TAL<sup>300</sup>EEAC.LK<sup>300</sup>SPV<sup>300</sup>VALL<sup>300</sup>LP<sup>300</sup>T<sup>300</sup>GW<sup>300</sup>DS<sup>300</sup>HEE<sup>300</sup>ET<sup>300</sup>AY<sup>300</sup>CG<sup>300</sup>K<sup>300</sup>Y<sup>300</sup>VDG...K  
*Legionella\_waltersii\_ApaH* K...DTYR...K.KVGVHPALLFALEQ<sup>300</sup>IKEK<sup>300</sup>VKLAK.SK<sup>300</sup>GI<sup>300</sup>IAL<sup>300</sup>LP<sup>300</sup>T<sup>300</sup>GW<sup>300</sup>DS<sup>300</sup>HEE<sup>300</sup>ET<sup>300</sup>AY<sup>300</sup>CG<sup>300</sup>K<sup>300</sup>F<sup>300</sup>VDG...  
*Legionella\_busanensis\_ApaH* DDPNYVRE...N.SRDLHPIMEDLL<sup>300</sup>TQI...EQAC<sup>300</sup>NNPRD<sup>300</sup>TAI<sup>300</sup>Y<sup>300</sup>LV<sup>300</sup>IG<sup>300</sup>W<sup>300</sup>DS<sup>300</sup>SH<sup>300</sup>GK<sup>300</sup>ER<sup>300</sup>AG<sup>300</sup>CS<sup>300</sup>K<sup>300</sup>DI<sup>300</sup>Y<sup>300</sup>RG<sup>300</sup>INK<sup>300</sup>TT<sup>300</sup>K<sup>300</sup>FE<sup>300</sup>Y  
*Legionella\_moravica\_ApaH* S...LTFR...K.KISLHPALQFALAK<sup>300</sup>IKEQIAQAK.THHH<sup>310</sup>IALL<sup>310</sup>LP<sup>310</sup>T<sup>310</sup>GW<sup>310</sup>DS<sup>310</sup>HEE<sup>310</sup>ET<sup>310</sup>AY<sup>310</sup>CG<sup>310</sup>K<sup>310</sup>W<sup>310</sup>VNE...  
*Legionella\_sp\_ApaH* Q...SGRT...N.ATELHPALLYSIST<sup>300</sup>LKNQ<sup>300</sup>VEHAK.TN<sup>300</sup>QK<sup>300</sup>IMLL<sup>300</sup>LP<sup>300</sup>S<sup>300</sup>GW<sup>300</sup>DS<sup>300</sup>SH<sup>300</sup>VH<sup>300</sup>ET<sup>300</sup>AP<sup>300</sup>CG<sup>300</sup>K<sup>300</sup>L<sup>300</sup>LYG...H  
*Legionella\_antarctica\_ApaH* K...L<sup>290</sup>TR...S.SISLHPALLFSLG<sup>300</sup>KIKENIVNAK.RT<sup>300</sup>GK<sup>300</sup>I<sup>300</sup>VLY<sup>300</sup>LA<sup>300</sup>T<sup>300</sup>GW<sup>300</sup>DS<sup>300</sup>HEE<sup>300</sup>ET<sup>300</sup>AY<sup>300</sup>CG<sup>300</sup>K<sup>300</sup>F<sup>300</sup>IND...  
*Legionella\_sp\_HdaH* S...MLP...K.TTGIHPALIY<sup>300</sup>TLNK<sup>300</sup>TAA<sup>300</sup>LFD<sup>300</sup>KAQ.RE<sup>300</sup>QRP<sup>300</sup>I<sup>300</sup>LAL<sup>300</sup>LP<sup>300</sup>T<sup>300</sup>GW<sup>300</sup>DS<sup>300</sup>SH<sup>300</sup>VD<sup>300</sup>ER<sup>300</sup>AY<sup>300</sup>CA<sup>300</sup>K<sup>300</sup>Y<sup>300</sup>LG<sup>300</sup>N...

*Legionella\_cherrii\_ApaH*  $\beta 13$   $\alpha 14$   $\alpha 15$   $\beta 14$   $\alpha 16$   $\alpha 17$   $\eta 3$   
 350 360 370 380 390 400 410 420  
*Legionella\_cherrii\_ApaH* YL<sup>350</sup>M<sup>350</sup>GAT<sup>350</sup>E<sup>350</sup>ARK<sup>350</sup>T<sup>350</sup>R<sup>350</sup>LNT<sup>350</sup>TD<sup>350</sup>LY<sup>350</sup>F<sup>350</sup>Y<sup>350</sup>ES<sup>350</sup>IF<sup>350</sup>K<sup>350</sup>LY<sup>350</sup>REN<sup>350</sup>KD<sup>350</sup>HIEK<sup>350</sup>VY<sup>350</sup>WG<sup>350</sup>LEGGY<sup>350</sup>DR<sup>350</sup>KM<sup>350</sup>Y<sup>350</sup>EQ<sup>350</sup>Q<sup>350</sup>IEL<sup>350</sup>MS<sup>350</sup>I<sup>350</sup>V<sup>350</sup>LND<sup>350</sup>.LVH<sup>350</sup>QD<sup>350</sup>.TH<sup>350</sup>QM<sup>350</sup>.GK  
*Legionella\_pneumophila\_ApaH* RM<sup>350</sup>M<sup>350</sup>GK<sup>350</sup>TA<sup>350</sup>AHQ<sup>350</sup>R<sup>350</sup>FND<sup>350</sup>GD<sup>350</sup>LY<sup>350</sup>F<sup>350</sup>Y<sup>350</sup>ES<sup>350</sup>IF<sup>350</sup>FLY<sup>350</sup>NEN<sup>350</sup>KD<sup>350</sup>CV<sup>350</sup>DT<sup>350</sup>IY<sup>350</sup>WG<sup>350</sup>LEGGY<sup>350</sup>DR<sup>350</sup>TM<sup>350</sup>Y<sup>350</sup>ER<sup>350</sup>EL<sup>350</sup>KI<sup>350</sup>LL<sup>350</sup>QV<sup>350</sup>IE<sup>350</sup>KQ<sup>350</sup>.LL<sup>350</sup>PK<sup>350</sup>D<sup>350</sup>.SN<sup>350</sup>SH<sup>350</sup>.SM  
*Legionella\_bozemaniae\_ApaH* DL<sup>350</sup>M<sup>350</sup>GIA<sup>350</sup>E<sup>350</sup>ARK<sup>350</sup>T<sup>350</sup>R<sup>350</sup>FNS<sup>350</sup>KD<sup>350</sup>LY<sup>350</sup>F<sup>350</sup>Y<sup>350</sup>ES<sup>350</sup>IF<sup>350</sup>K<sup>350</sup>LY<sup>350</sup>QEN<sup>350</sup>KD<sup>350</sup>YIEK<sup>350</sup>IY<sup>350</sup>WG<sup>350</sup>LEGGY<sup>350</sup>DR<sup>350</sup>KM<sup>350</sup>Y<sup>350</sup>EQ<sup>350</sup>Q<sup>350</sup>IQL<sup>350</sup>MS<sup>350</sup>L<sup>350</sup>IL<sup>350</sup>KD<sup>350</sup>.IV<sup>350</sup>H<sup>350</sup>QD<sup>350</sup>.TN<sup>350</sup>QM<sup>350</sup>.VP  
*Legionella\_erythra\_ApaH* HT<sup>350</sup>L<sup>350</sup>SSK<sup>350</sup>ESH<sup>350</sup>SR<sup>350</sup>F<sup>350</sup>SD<sup>350</sup>E<sup>350</sup>IF<sup>350</sup>HE<sup>350</sup>TQ<sup>350</sup>K<sup>350</sup>IV<sup>350</sup>EM<sup>350</sup>IK<sup>350</sup>TY<sup>350</sup>PD<sup>350</sup>LCR<sup>350</sup>VY<sup>350</sup>WG<sup>350</sup>LEGGY<sup>350</sup>TE<sup>350</sup>Y<sup>350</sup>VN<sup>350</sup>V<sup>350</sup>R<sup>350</sup>QL<sup>350</sup>KN<sup>350</sup>TV<sup>350</sup>GIL<sup>350</sup>NE...FYP<sup>350</sup>W<sup>350</sup>VEE<sup>350</sup>T<sup>350</sup>M<sup>350</sup>EN<sup>350</sup>SK  
*Legionella\_geestiana\_ApaH* DE<sup>350</sup>L<sup>350</sup>SEE<sup>350</sup>ES<sup>350</sup>RV<sup>350</sup>CR<sup>350</sup>FND<sup>350</sup>DF<sup>350</sup>GI<sup>350</sup>F<sup>350</sup>N<sup>350</sup>YL<sup>350</sup>IM<sup>350</sup>TY<sup>350</sup>QDN<sup>350</sup>RE<sup>350</sup>HMS<sup>350</sup>HL<sup>350</sup>Y<sup>350</sup>WG<sup>350</sup>LEGGY<sup>350</sup>ER<sup>350</sup>GM<sup>350</sup>Y<sup>350</sup>EF<sup>350</sup>Q<sup>350</sup>ARK<sup>350</sup>LLEA<sup>350</sup>ID<sup>350</sup>VR<sup>350</sup>.L<sup>350</sup>INK<sup>350</sup>P<sup>350</sup>.AEG<sup>350</sup>P<sup>350</sup>.AS  
*Legionella\_spiritensis\_ApaH* QE<sup>350</sup>L<sup>350</sup>TP<sup>350</sup>K<sup>350</sup>Q<sup>350</sup>SSG<sup>350</sup>CR<sup>350</sup>F<sup>350</sup>TD<sup>350</sup>RD<sup>350</sup>MT<sup>350</sup>Y<sup>350</sup>FN<sup>350</sup>R<sup>350</sup>QL<sup>350</sup>ML<sup>350</sup>LC<sup>350</sup>Q<sup>350</sup>D<sup>350</sup>Y<sup>350</sup>K<sup>350</sup>PI<sup>350</sup>I<sup>350</sup>QR<sup>350</sup>IY<sup>350</sup>WG<sup>350</sup>LEGGY<sup>350</sup>T<sup>350</sup>DE<sup>350</sup>VN<sup>350</sup>FR<sup>350</sup>Q<sup>350</sup>IAC<sup>350</sup>L<sup>350</sup>TE<sup>350</sup>CL<sup>350</sup>Q<sup>350</sup>SL<sup>350</sup>.FL<sup>350</sup>ND<sup>350</sup>.NE<sup>350</sup>VE<sup>350</sup>CE  
*Legionella\_waltersii\_ApaH* RM<sup>350</sup>MG<sup>350</sup>Y<sup>350</sup>ESA<sup>350</sup>KTY<sup>350</sup>R<sup>350</sup>FND<sup>350</sup>GD<sup>350</sup>LY<sup>350</sup>F<sup>350</sup>Y<sup>350</sup>EV<sup>350</sup>F<sup>350</sup>K<sup>350</sup>LY<sup>350</sup>N<sup>350</sup>ND<sup>350</sup>PC<sup>350</sup>FAS<sup>350</sup>LY<sup>350</sup>WG<sup>350</sup>LEGGY<sup>350</sup>D<sup>350</sup>NT<sup>350</sup>MY<sup>350</sup>TK<sup>350</sup>Q<sup>350</sup>IKL<sup>350</sup>LM<sup>350</sup>QL<sup>350</sup>IS<sup>350</sup>KE<sup>350</sup>.L<sup>350</sup>VP<sup>350</sup>KA<sup>350</sup>.TH<sup>350</sup>ST<sup>350</sup>.PL  
*Legionella\_busanensis\_ApaH* RN<sup>350</sup>IY<sup>350</sup>DQ<sup>350</sup>E<sup>350</sup>IKE<sup>350</sup>OR<sup>350</sup>FND<sup>350</sup>GD<sup>350</sup>FE<sup>350</sup>H<sup>350</sup>Y<sup>350</sup>K<sup>350</sup>QL<sup>350</sup>RE<sup>350</sup>V<sup>350</sup>INK<sup>350</sup>Y...K<sup>350</sup>IP<sup>350</sup>F<sup>350</sup>VY<sup>350</sup>VS<sup>350</sup>LEGGY<sup>350</sup>TE<sup>350</sup>AV<sup>350</sup>N<sup>350</sup>K<sup>350</sup>Q<sup>350</sup>TEM<sup>350</sup>L<sup>350</sup>IK<sup>350</sup>L<sup>350</sup>LT<sup>350</sup>PT<sup>350</sup>IT<sup>350</sup>P<sup>350</sup>QE<sup>350</sup>.QS<sup>350</sup>KE<sup>350</sup>.E<sup>350</sup>I  
*Legionella\_moravica\_ApaH* RM<sup>350</sup>MS<sup>350</sup>LS<sup>350</sup>E<sup>350</sup>ASK<sup>350</sup>T<sup>350</sup>R<sup>350</sup>FND<sup>350</sup>GD<sup>350</sup>LY<sup>350</sup>F<sup>350</sup>Y<sup>350</sup>EQ<sup>350</sup>IF<sup>350</sup>FLY<sup>350</sup>N<sup>350</sup>KN<sup>350</sup>RE<sup>350</sup>L<sup>350</sup>IKG<sup>350</sup>IY<sup>350</sup>WG<sup>350</sup>LEGGY<sup>350</sup>DR<sup>350</sup>AM<sup>350</sup>Y<sup>350</sup>ER<sup>350</sup>Q<sup>350</sup>V<sup>350</sup>SL<sup>350</sup>IT<sup>350</sup>QI<sup>350</sup>IT<sup>350</sup>AH<sup>350</sup>.L<sup>350</sup>PH<sup>350</sup>QA<sup>350</sup>.SS<sup>350</sup>SS<sup>350</sup>.SA  
*Legionella\_sp\_ApaH* TM<sup>350</sup>MS<sup>350</sup>DE<sup>350</sup>ET<sup>350</sup>QL<sup>350</sup>CR<sup>350</sup>FND<sup>350</sup>Q<sup>350</sup>DL<sup>350</sup>S<sup>350</sup>Y<sup>350</sup>HE<sup>350</sup>IF<sup>350</sup>FLY<sup>350</sup>LEN<sup>350</sup>PE<sup>350</sup>V<sup>350</sup>FKG<sup>350</sup>IY<sup>350</sup>WG<sup>350</sup>LEGGY<sup>350</sup>NR<sup>350</sup>AM<sup>350</sup>Y<sup>350</sup>EQ<sup>350</sup>IS<sup>350</sup>L<sup>350</sup>AE<sup>350</sup>SI<sup>350</sup>ITH<sup>350</sup>.F<sup>350</sup>YS<sup>350</sup>QD<sup>350</sup>.L<sup>350</sup>TP<sup>350</sup>S<sup>350</sup>.LR  
*Legionella\_antarctica\_ApaH* RM<sup>350</sup>MS<sup>350</sup>QS<sup>350</sup>E<sup>350</sup>AGT<sup>350</sup>R<sup>350</sup>FND<sup>350</sup>GD<sup>350</sup>LY<sup>350</sup>F<sup>350</sup>FE<sup>350</sup>IL<sup>350</sup>TY<sup>350</sup>SEN<sup>350</sup>KE<sup>350</sup>L<sup>350</sup>IES<sup>350</sup>IY<sup>350</sup>WG<sup>350</sup>LEGGY<sup>350</sup>ER<sup>350</sup>MY<sup>350</sup>E<sup>350</sup>K<sup>350</sup>Q<sup>350</sup>IQL<sup>350</sup>ML<sup>350</sup>DT<sup>350</sup>ID<sup>350</sup>GO<sup>350</sup>.L<sup>350</sup>L<sup>350</sup>HE<sup>350</sup>D<sup>350</sup>.IN<sup>350</sup>QS<sup>350</sup>.SL  
*Legionella\_sp\_HdaH* KW<sup>350</sup>M<sup>350</sup>NK<sup>350</sup>H<sup>350</sup>E<sup>350</sup>AY<sup>350</sup>SS<sup>350</sup>R<sup>350</sup>FD<sup>350</sup>NAD<sup>350</sup>WT<sup>350</sup>Y<sup>350</sup>DG<sup>350</sup>IF<sup>350</sup>K<sup>350</sup>LF<sup>350</sup>QDN<sup>350</sup>K<sup>350</sup>CLEA<sup>350</sup>VY<sup>350</sup>LG<sup>350</sup>LEGGY<sup>350</sup>EP<sup>350</sup>HV<sup>350</sup>Y<sup>350</sup>LN<sup>350</sup>Q<sup>350</sup>IT<sup>350</sup>LL<sup>350</sup>H<sup>350</sup>Q<sup>350</sup>K<sup>350</sup>IG<sup>350</sup>SC<sup>350</sup>.AQ<sup>350</sup>P<sup>350</sup>Q<sup>350</sup>V<sup>350</sup>.AS<sup>350</sup>Y<sup>350</sup>P<sup>350</sup>.Q.

*Legionella\_cherrii\_ApaH*

*Legionella\_cherrii\_ApaH* TSS.....P  
*Legionella\_pneumophila\_ApaH* S.....Y  
*Legionella\_bozemaniae\_ApaH* DSS.....KKI  
*Legionella\_erythra\_ApaH* ALA.....T  
*Legionella\_geestiana\_ApaH* SSLVEDDAPSGPSL  
*Legionella\_spiritensis\_ApaH* KME.I.....TG  
*Legionella\_waltersii\_ApaH* NQ.....L  
*Legionella\_busanensis\_ApaH* NNY.....SFV  
*Legionella\_moravica\_ApaH* GMS.....Y  
*Legionella\_sp\_ApaH* .....R  
*Legionella\_antarctica\_ApaH* GIN.....C  
*Legionella\_sp\_HdaH* .....P

**Supplementary Figure 21: Primary sequence alignment of selected bacterial deacylases of cluster 3 (UniProt accession numbers are shown).**

Show are the following sequences of the following deacylases representing enzymes of cluster 3 and the sub-clusters (code: sub-cluster, accession number/protein name/species): 3, A0A0W0SGS1/ApaH/*Legionella cherii*; 3, A0A2S6EWW0/ApaH/*Legionella pneumophila*; 3, A0A0W0RV07/ApaH/*Legionella bozemanæ* (*Fluoribacter bozemanæ*); 3, A0A0W0TS12/ApaH/*Legionella erythra*; 3, A0A0W0TY70/ApaH/*Legionella geestiana*; 3, A0A0W0YXX3/ApaH/*Legionella spiritensis*; 3, A0A0W1A0K6/ApaH/*Legionella waltersii*; 3, A0A378JU93/ApaH/*Legionella busanensis*; 3, A0A378K274/ApaH/*Legionella moravica*; 3, A0A522FB57/ApaH/*Legionella sp.*; 3, A0A6F8T350/ApaH/*Legionella antarctica*; 3, A0A811Q8A3/HdaH/*Legionella sp.* All sequences were aligned using the T-COFFEE multiple sequence alignment server<sup>1</sup>. The important catalytic residues are highlighted. The secondary structure elements and numbering is shown for the deacylase shown at the top of the amino acid sequences above the sequence alignment. The alignment was created by ESPript version 3.0<sup>2</sup>.

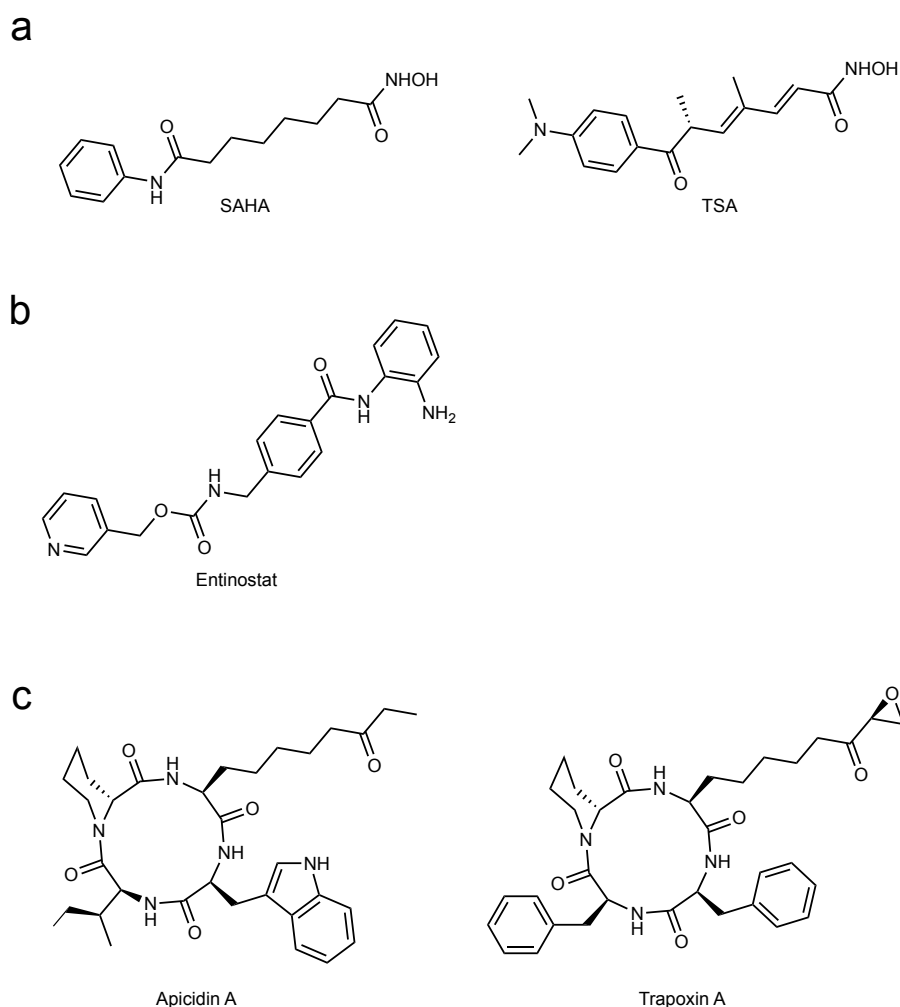

**Supplementary Figure 22: Overview of structures of deacylase hydroxamate inhibitors SAHA, trichostatin A (TSA), benzamide entinostat (MS-275) and the cyclic peptides apicidin A and trapoxin A.**

- The hydroxamate inhibitors trichostatin A (TSA) and SAHA (vorinostat, suberoylanilide hydroxamic acid (SAHA)) are potent class I and class II classical HDAC pan-inhibitors. The hydroxamate moiety is used to complex the catalytic  $Zn^{2+}$ -ion. Bacterial deacylases of all clusters, except from cluster B, are potently inhibited by these hydroxamate inhibitors.
- The benzamide inhibitor entinostat (MS-275) shows selectivity towards class I HDACs. Our data show no bacterial deacylase being potently inhibited by this benzamide inhibitor.
- The cyclic peptide inhibitors trapoxin A and apicidin A were shown to selectively inhibit class I HDACs. This is in agreement with our data revealing only cluster B enzyme *BsAcuC* being selectively and potently inhibited by both cyclic peptide inhibitors.

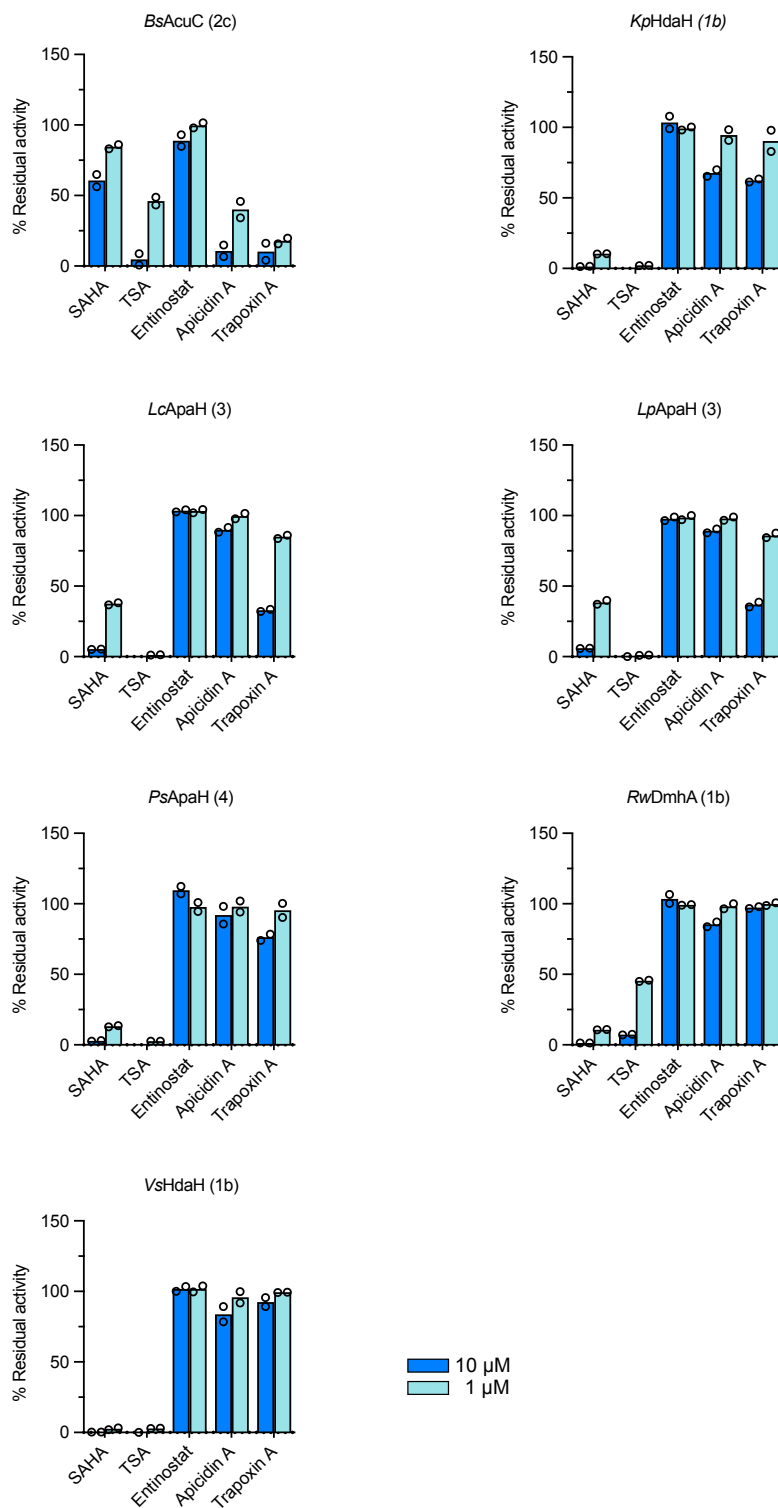

### Supplementary Figure 23: Screening of hydroxamate, benzamide and cyclic peptide inhibitors to inhibit selected bacterial deacylases.

The hydroxamate inhibitors trichostatin A (TSA) and SAHA (vorinostat), the benzamide inhibitor entinostat (MS-275) and the cyclic peptide inhibitors trapoxin A and apicidin A were used at concentrations of 1  $\mu$ M and 10  $\mu$ M and varying enzyme concentrations (cluster A: 15 nM *KpHdaH*, 30 nM *RwDmhA* 1.5 nM *VsHdaH*; cluster B: 200 nM *BsAcuC*; cluster D: 40 nM *PsApaH*; cluster E: 30.5 nM *LcApaH*, 0.5 nM *LpApaH*) to screen selected bacterial deacylases. The assay was conducted for 1h at 37°C before stopping the reaction. The measured residual activity was determined in % based on the AMC fluorescence obtained defining the 100% value by measuring the fluorescence of the free AMC-fluorophore at the substrate concentrations (40  $\mu$ M LGKac *BsAcuC* (2c), *LcApaH* (3), *LpApaH* (3); 60  $\mu$ M QPKKac: *KpHdaH* (1b), *RwDmhA* (1b), *VsHdaH* (1b), *PsApaH* (1b)). The data obtained for 1  $\mu$ M inhibitor was used to create the heat map shown in Fig. 8a. The experiment was performed in two independent replicates ( $n=2$ ). Bars depict means. Source data are provided as Source Data file.

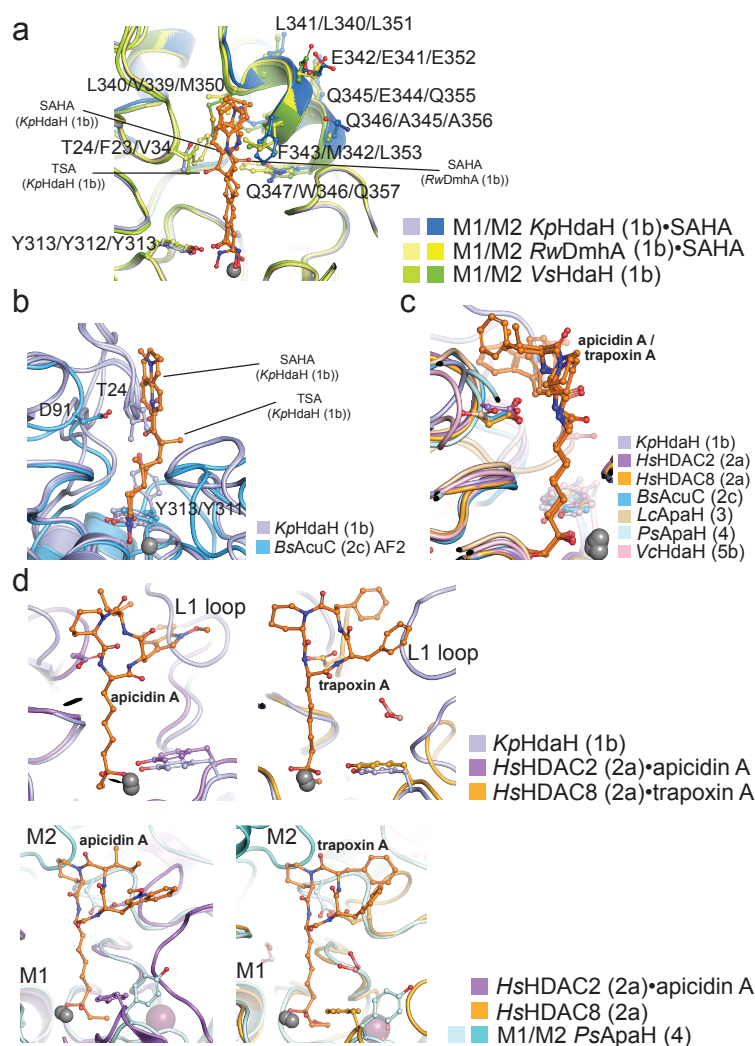

**Supplementary Figure 24: Structural determinants for selectivity of hydroxamate inhibitors SAHA and TSA and of trapoxin A and apicidin A in inhibition of bacterial deacylases.**

- a** *RwDmhA* (1b) is the only enzyme showing better inhibition by SAHA compared to TSA and *VsHdaH* (1b) is equally well inhibited by SAHA and TSA. To reveal the underlying mechanism, the structures of *RwDmhA* (1b) and *VsHdaH* (1b) (AF2) were superimposed with *KpHdaH* (1b)•TSA and *KpHdaH* (1b)•SAHA. Shown is a closeup to provide details on binding of the inhibitors.
- b** To reveal molecular determinants underlying the low potency of inhibition of *BsAcuC* (2c) activity observed for SAHA and TSA, the AlphaFold2 model of *BsAcuC* (2c) was superimposed with the structures of *KpHdaH* (1b)•TSA and *KpHdaH* (1b)•SAHA.
- c** D101/D100 in *HsHDAC8/HsHDAC2* is needed for inhibition by trapoxin A and apicidin A. Superposition of the structures of the core domains of bacterial deacylases *KpHdaH* (1b), *RwDmhA* (1b), *RsPrpH* (1b) *BsAcuC* (2c), *LpApaH* (3), *LcApaH* (3), *PsApaH* (4) *VcHdaH* (5b) and *HsHDAC2* (2a) and *HsHDAC8* (2a) and modelling of trapoxin A and apicidin A reveals, except from *PsApaH* (4) and *VcHdaH* (5b), either a negatively charged D or E is present at analogue localization as in *HsHDAC2* (2a) and *HsHDAC8* (2a). The observed lack of inhibition of *KpHdaH* (1b), *RwDmhA* (1b), *RsPrpH* (1b), *LpApaH* (3), *LcApaH* (3), *PsApaH* (4) *VcHdaH* (5b) is due to other determinants in structure or sequence.
- d** Except from *BsAcuC* (2c) none of the bacterial enzymes is inhibited by apicidin A or trapoxin A. Superposition of structures of bacterial deacylases with apicidin A and trapoxin A were done to reveal molecular mechanisms explaining the lack of inhibition of bacterial deacylases *KpHdaH* (1b), and *PsApaH* (4) by apicidin A and trapoxin A. *PsApaH* (4) and *VcHdaH* (5b) do not contain an D/E at the analogous position to D101/D100 in *HsHDAC8/HsHDAC2* explaining their lack in inhibition by cyclic peptides (*KpHdaH* (1b): E101; *BsAcuC* (2c): D91; *LpApaH* (3): D146; *LcApaH* (3): D144; *PsApaH* (4): G117; *VcHdaH* (5b): G97; *HsHDAC2*: D100; *HsHDAC8*: D101). For the complexes the crystal structures of the indicated enzymes were superimposed with the structures of HDAC2•apicidinA (PDB: [7LTG](https://doi.org/10.2210/pdb7LTG/pdb) [<https://doi.org/10.2210/pdb7LTG/pdb>]) and HDAC8•trapoxin A (PDB: [5VI6](https://doi.org/10.2210/pdb5VI6/pdb) [<https://doi.org/10.2210/pdb5VI6/pdb>]) to model the localization of apicidin A and trapoxin A. For *BsAcuC* (2c) the AlphaFold2 model was used.



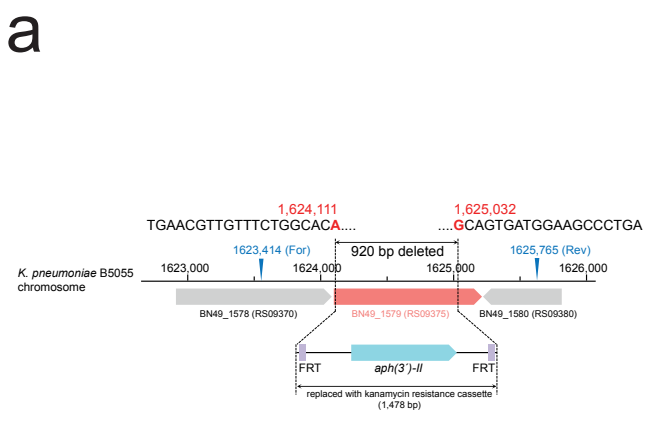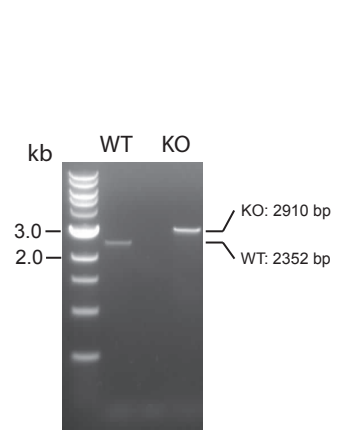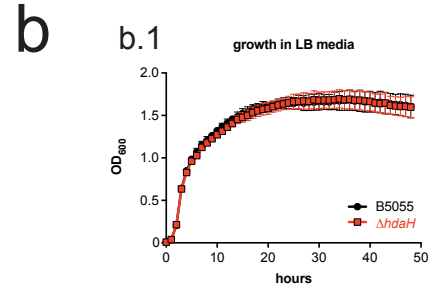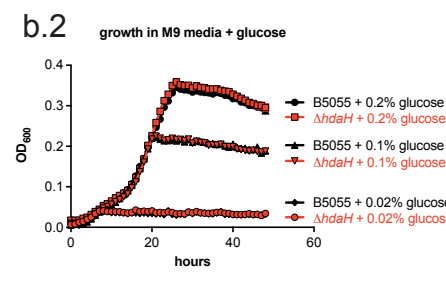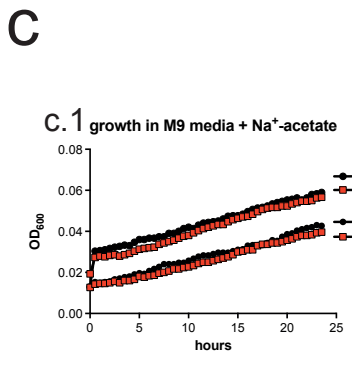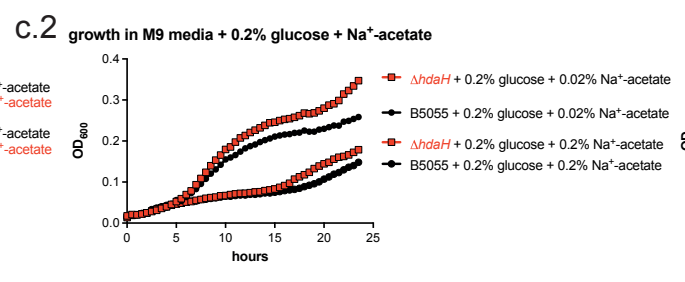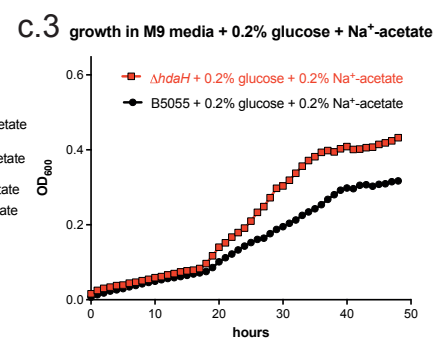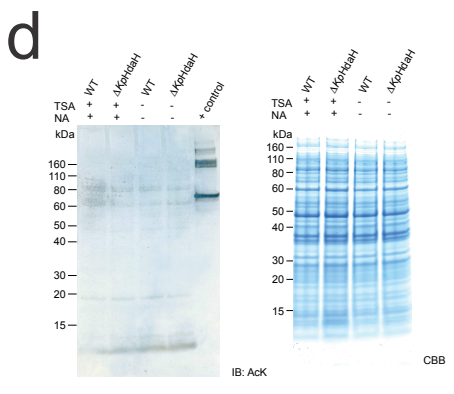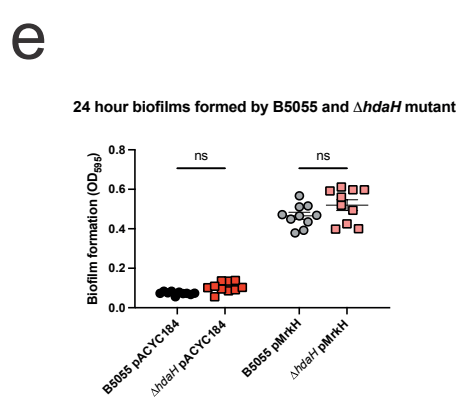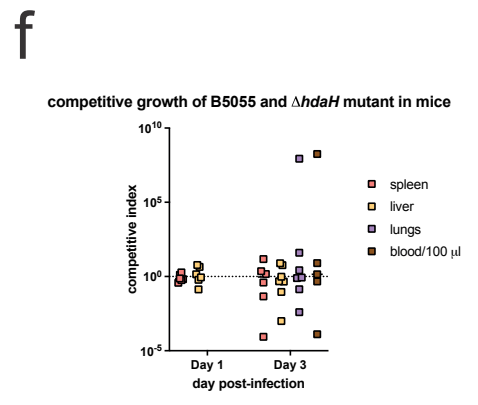

**Supplementary Figure 25: Impact of genomic deletion of *hdaH* in *K. pneumoniae* on growth, biofilm formation and virulence.**

- a** Genomic deletion of the gene *hdaH* encoding for KpHdaH (1b) in the genome of *K. pneumoniae* B5055 (B5055). To determine whether the gene encoded a product that was functional in the metabolism and pathogenesis of site-specific mutagenesis deleting the *hdaH* gene in B5055 was conducted. The KpHdaH enzyme is annotated as a putative histone deacetylase encoded by BN49\_1579 (BN49\_RS09375) on the chromosome of *Klebsiella pneumoniae*. The BN49\_1579 gene was disrupted by replacing a 920 bp coding region with a 1,478 bp kanamycin resistance cassette (flanked by FRT sites) using  $\lambda$ -red recombinase-mediated gene gorging method<sup>5</sup>. The location of BN49\_1579 and key sites for mutagenesis are shown, with genomic coordinates obtained from [www.biocyc.org](http://www.biocyc.org). Block arrows depict annotated transcription units in the direction of transcription. Dotted lines indicate the excision points immediately adjacent to the deleted sequence. The up- and downstream sequences flanking the deletion site are shown above, with the last bp retained and their coordinates shown in red. Blue triangles show primer binding sites (For, forward primer; Rev, reverse primer) for PCR that confirms gene deletion. The agarose gel electrophoresis image shows PCR products of expected size for wildtype (WT) and knockout (KO) *K. pneumoniae*. The B5055 *hdaH* mutant ( $\Delta hdaH$ ) and wildtype (WT) B5055 were analysed by whole-genome sequencing using the Illumina platform. No secondary mutation outside of BN49\_1579 was detected, thus validating site-specific mutation in the mutant strain. Source data are provided as Source Data file.
- b** Growth of B5055 in LB-medium and M9-medium supplemented with glucose is not affected by the absence of HdaH. Top panel, b.1: The B5055 WT and B5055  $\Delta hdaH$  were grown in Luria-Bertani broth, a rich medium containing multiple carbon sources. The growth curves of the WT and  $\Delta hdaH$  were determined using a CLARIOstar Plus plate reader over 48 hours. There was no difference in the fundamental growth kinetics. Both isolates demonstrated similarities in lag, log and stationary phases. Lower panel, b.2: To determine whether the multiple carbon sources and high glucose concentrations of LB obscured differences in growth kinetics, the B5055 WT and B5055  $\Delta hdaH$  were grown in minimal medium (M9) with varying concentrations of glucose. Terminal OD<sub>600</sub> was determined by glucose concentration and were approximately 25% of OD<sub>600</sub> generated by growth in LB broth. Again, there were no differences in the growth kinetics of the B5055 WT and B5055  $\Delta hdaH$ . The analysis of growth in rich and simple media comparing B5055 WT and B5055  $\Delta hdaH$  in central glucose metabolism of B5055 suggested that KpHdaH (1b) had no role in determining the kinetics of growth when glucose was provided as the sole source of carbon. The experiment was performed with three biological replicates ( $n=3$ ) each containing 4 technical replicates. Data are presented as means $\pm$ SD of the three biological replicates. Source data are provided as Source Data file.
- c** We next explored whether B5055  $\Delta hdaH$  increased the rate or level of growth when sodium acetate was provided as the sole carbon source. Left pane, c.1: Growth of B5055 in sodium acetate was very limited albeit the level of growth was determined by the concentration by the amount of sodium acetate added. Again there was no difference in growth rate when the WT was compared with the  $\Delta hdaH$  mutant. Middle panel, c.2: When glucose was added to acetate in M9 medium, differences in growth rate were observed between the B5055 WT and the B5055  $\Delta hdaH$  mutant. The level of growth for the B5055  $\Delta hdaH$  was increased over that of the B5055 WT for the first 24 hours, suggesting that the presence of an intact *hdaH* locus, together with sodium acetate reduced growth of *K. pneumoniae* B5055. Right panel, c.3: When the analysis was extended by a further 24 hours, a second lag and renewed exponential growth was seen in an additional phase of growth (diauxic growth). We hypothesized that once glucose was consumed B5055 switched to using acetate as the carbon source. The experiment was performed with two biological replicates ( $n=2$ ), each containing 4 technical replicates. Data are represented as means. Source data are provided as Source Data file.
- d** Genomic deletion of *K. pneumoniae hdaH* does not result in a generalised alteration of the acetylation pattern in cells grown in M9 medium. To determine whether any deacylation activity of KpHdaH could be identified in cultured *K. pneumoniae* B5055, the B5055 WT and B5055  $\Delta hdaH$  mutant from stationary phase cultures of bacteria grown in M9 medium were analysed by Western immunoblotting using an acetyl-group specific antibody (IB: AcK). The positive control was acetylated bovine serum albumin (BSA), which was clearly positive in the Western blot, with a MW consistent with that of BSA (67 kDa). Different additives including the classical deacetylase inhibitor trichostatin A (TSA; 200 nM) and nicotinamide (NA; 2 mM) were supplied but there was no difference in the Western blot profile of B5055 WT and B5055  $\Delta hdaH$ . Source data are provided as Source Data file.
- e** *K. pneumoniae* HdaH does not affect biofilm formation. Two further analyses were undertaken of the B5055 WT and B5055  $\Delta hdaH$ . Firstly, the impact of the putative de-acetylase on biofilm formation was determined. *K. pneumoniae* B5055 is a poor biofilm former because it lacks an intact

copy of MrkH, the transcriptional activator of Mrk fimbriae expression. The Mrk fimbria is a key mediator of *K. pneumoniae* biofilm formation<sup>6</sup>. To address this issue, B5055 and the  $\Delta hdaH$  mutant of B5055 were transfected with a functional plasmid copy of MrkH (pMrkH). The supply of *mrkH* in trans resulted in an increase in biofilm formation, however there was no significant difference in the level of biofilm produced by the WT complemented with pMrkH) and the  $\Delta hdaH$  mutant. Ten independent biological experiments were conducted and the data shown are the technical replicates from one representative experiment. Ten individual data points for each isolate (B5055 WT and B5055  $\Delta hdaH$ ) were collected from each of two independent experiments. A representative experiment is presented (technical replicates,  $n=10$ ). There was no statistical difference (ns) in the level of biofilm produced by B5055 and B5055  $\Delta hdaH$  using an ordinary one-way ANOVA test (Tukey's multiple comparison test) with a significance level of  $p<0.05$ . Exact values can be found in the Source Data. Source data are provided as Source Data file.

- f** *K. pneumoniae* HdaH has no direct effect on *K. pneumoniae* virulence. Lastly, the virulence of the WT and the  $\Delta hdaH$  mutant was tested in C57BL/6 (BL/6) mice. B5055 is a known virulent isolate in BL/6 mice<sup>7,8</sup>. Animals were infected with 3 different doses of WT and  $\Delta hdaH$  mutant. *In toto*, these studies failed to reveal a dose-dependent phenotype associated with loss of the *hdaH* locus. While in some experiments, it appeared that there may have been some growth attenuation of  $\Delta hdaH$ , the effects were not consistent. At low doses ( $10^3$  colony forming units (CFU) injected intravenously (i.v.)), there may have been some growth deficit in  $\Delta hdaH$  but this was not seen when doses were increased 10-fold, where survival and weight loss post-infection were not increased by loss of the locus. Competitive infections were also assessed, where C57BL/6 mice were infected with equal numbers of the WT and *KpHdaH*  $\Delta hdaH$  mutant and then killed at day 1 or day 3 post-infection, and the number of *K. pneumoniae* in various tissues analysed by viable counts (right panel). However, again no significant effect was observed and the data shows quite huge variation. Data points represent individual mice ( $n=6$ ) in one experiment. The result is representative of two independent experiments. Source data are provided as Source Data file.

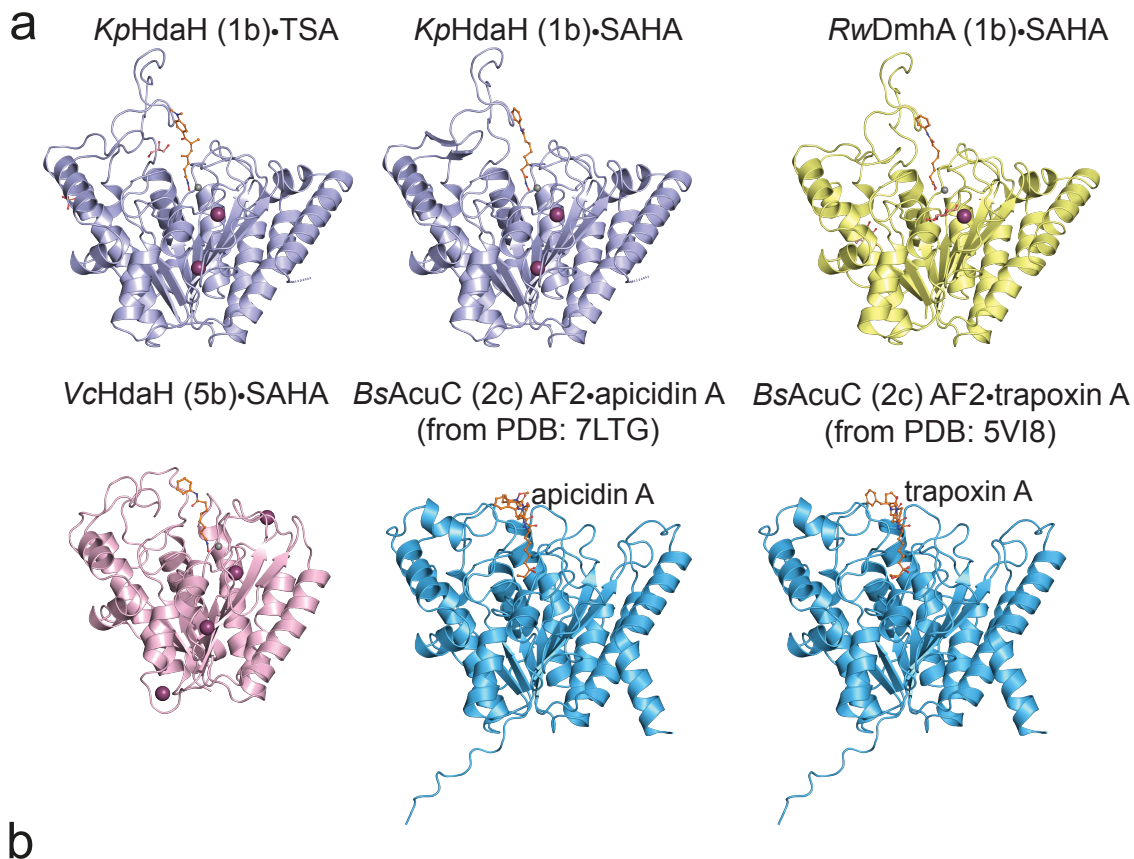

**b**

*Kp*HdaH (1b)•SAHA    *Rw*DmhA (1b)•SAHA    *Bs*AcuC (2c) AF2•apicidin A

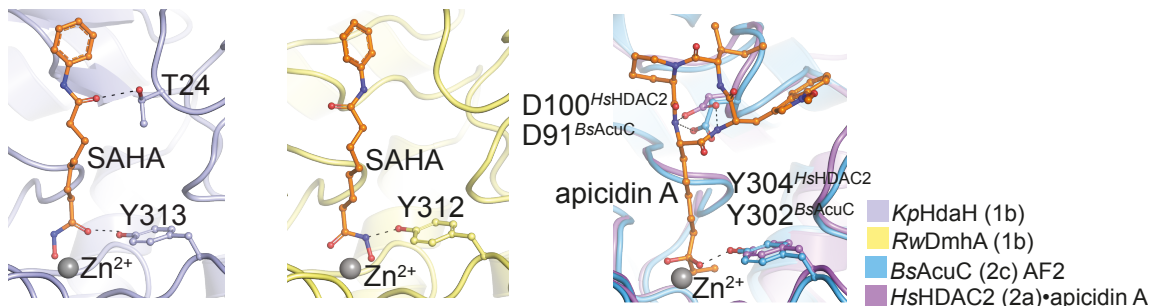

**Supplementary Figure 26: Overview of structures of bacterial deacylases in complexes with the hydroxamate inhibitors SAHA, and trichostatin A (TSA).**

- a.** Overview of all inhibitor bound-structures of bacterial deacylases of all sub-clusters. Shown are the following complexes of the deacylases in complexes with the hydroxamates SAHA and/or TSA: *Kp*HdaH•TSA, *Kp*HdaH•SAHA and *Rw*DmhA•SAHA of sub-cluster 1b and *Vc*HdaH•SAHA of cluster 5b. For the complexes of *Bs*AcuC of sub-cluster 2c with apixidin A and trapoxin A, the AlphaFold2 model of *Bs*AcuC was superimposed with the structures of HDAC2•apicidin A (PDB: [7LTG](https://doi.org/10.2210/pdb7LTG/pdb) [<https://doi.org/10.2210/pdb7LTG/pdb>]) and HDAC8•trapoxin A (PDB: [5VI6](https://doi.org/10.2210/pdb5VI6/pdb) [<https://doi.org/10.2210/pdb5VI6/pdb>]).
- b.** Closeup of the structures of *Kp*HdaH•TSA, *Rw*DmhA•SAHA and of the AlphaFold2 model of *Bs*AcuC in complex with apicidin A (from PDB: [7LTG](https://doi.org/10.2210/pdb7LTG/pdb) [<https://doi.org/10.2210/pdb7LTG/pdb>])). The conserved Tyr (*Kp*HdaH: Tyr313) directly contacts the oxygen /nitrogen of the hydroxamate groups of SAHA or TSA, respectively, or the gemdiol(ate) function of the apicidin A.. This is at the analogous position of the substrates' carbonyl oxygen of the acyl group. The hydroxamate and gemdiol(ate) function furthermore directly coordinates the catalytic Zn<sup>2+</sup>-ion in a bidentate fashion. As described for the interaction with SAHA, Thr24 in *Kp*HdaH forms an interaction to the TSA carbonyl oxygen. The interaction of the cyclic peptide inhibitor apicidin A is created by formation of a hydrogen bond with the conserved Asp91 in *Bs*AcuC (2c) towards the peptide bonds of the cyclic peptide inhibitor. This Asp contributes to the selective inhibition of class I HDACs.



## *KpHdaH* (1b)•TSA

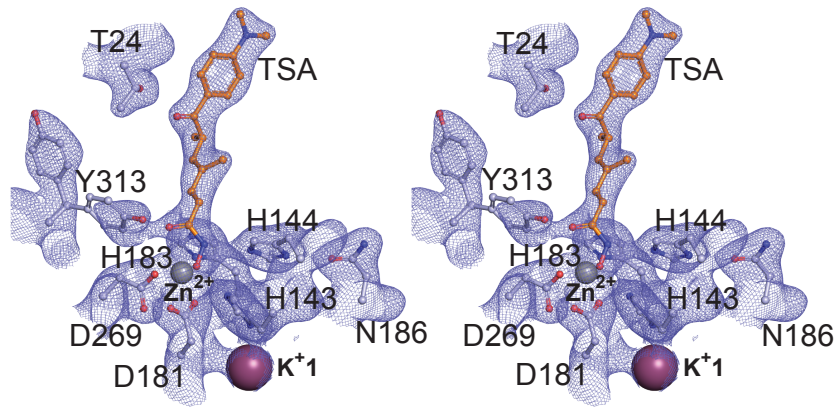

## *KpHdaH* (1b)•SAHA

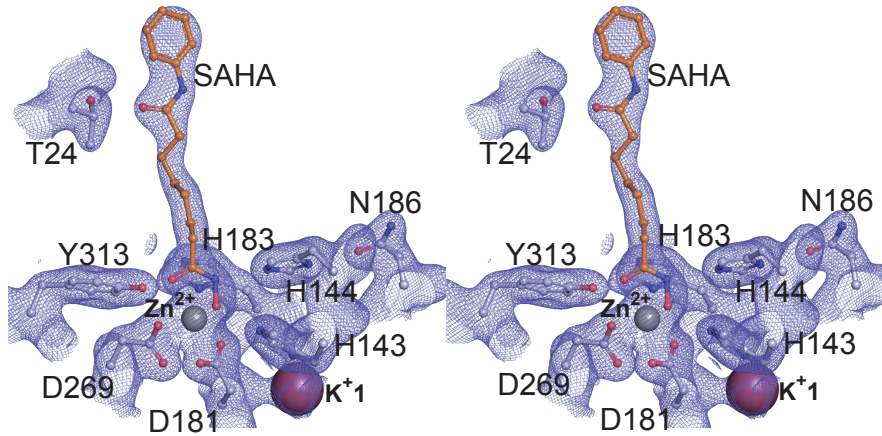

## *RwDmhA* (1b)•SAHA

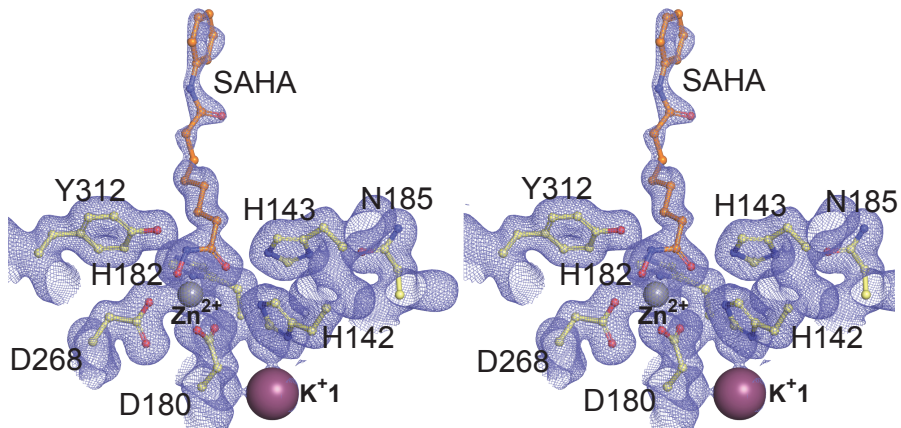

## *VcHdaH* (5b)•SAHA

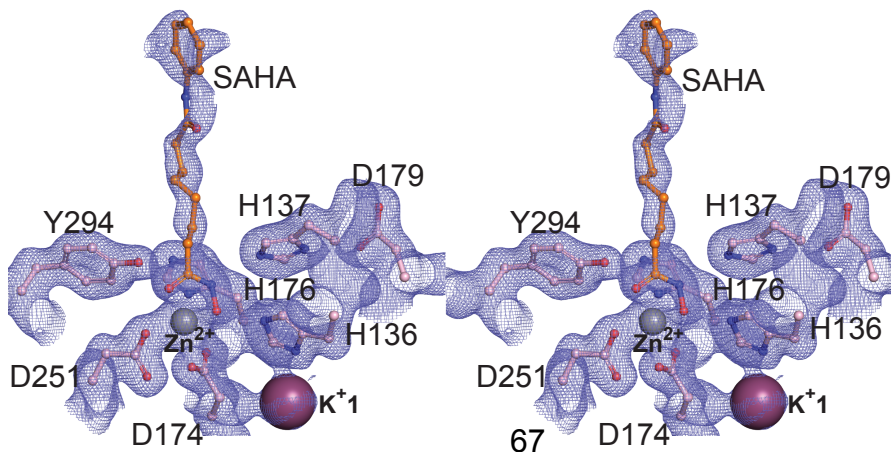

**Supplementary Figure 27: Stereo images of representative electron density for inhibitor-bound structures of bacterial deacylases of sub-cluster 1b solved in this study.**

Stereo figures for the inhibitor bound-structures of bacterial deacylases of all sub-clusters. Shown are closeups of the following complexes: *KpHdaH* (1b)•SAHA, *KpHdaH* (1b)•TSA and *RwDmhA* (1b)•SAHA and *VcHdaH* (5b)•SAHA of subcluster 1b. For all structures a representative closeup of the active site is shown, including the bidentate Zn<sup>2+</sup>-binding of the hydroxamate inhibitor, the coordinating His and the two Asp residues, the catalytic base His and the active site Tyr important to orient and polarize the carbonyl-group of the substrate and to stabilize the tetrahedral intermediate. Shown in blue is the electron density of the 2F<sub>o</sub>-F<sub>c</sub> map contoured at 1σ. The stereo diagrams were prepared in wall-eyed viewing mode with PyMOL version 2.3.4<sup>3</sup>.

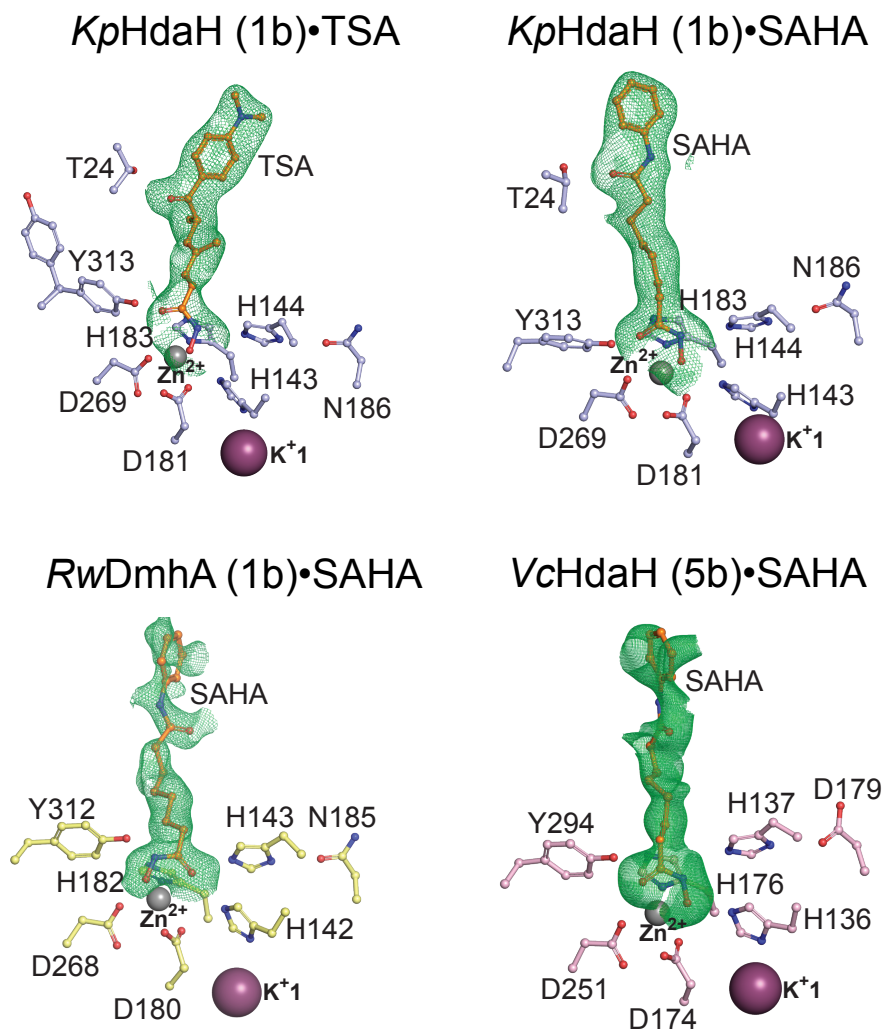

**Supplementary Figure 28:  $F_o-F_c$  omit maps for the electron density of the hydroxamates TSA and SAHA for all inhibitor-bound structures of bacterial deacylases solved in this study.**

Shown are the  $F_o-F_c$  omit maps (contour level  $3\sigma$ ) for the inhibitors TSA and SAHA for the structures of the deacylases in complexes with the hydroxamate inhibitors: *KpHdaH* (1b)•SAHA, *KpHdaH* (1b)•TSA, *RsPrpH* (1b)•SAHA, *RwDmhA* (1b)•SAHA and *VcHdaH* (5b)•SAHA. For all structures a representative closeup of the active site is shown, including the bidentate  $Zn^{2+}$ -binding of the hydroxamate inhibitor, the coordinating His and the two Asp residues, the catalytic base His and the active site Tyr important to orient and polarize the carbonyl-group of the substrate and to stabilize the tetrahedral intermediate. Shown in green is the electron density of the  $F_o-F_c$  map contoured at  $3\sigma$ . The figures were prepared with PyMOL version 2.3.4<sup>3</sup>.

and the XGGY-motif lining the foot pocket and the catalytic Tyr (*KpHdaH*: Y313); green box: RPP-motif lining the foot pocket.



**Supplementary Table 1: *Escherichia coli* strains used in this study.**

| Strain     | Genotype                                                                                                                                                                                                               | Reference/construction |
|------------|------------------------------------------------------------------------------------------------------------------------------------------------------------------------------------------------------------------------|------------------------|
| BL21 (DE3) | <i>B</i> <i>F</i> <sup>-</sup> <i>ompT gal dcm lon hsdS<sub>B</sub>(r<sub>B</sub><sup>-</sup>m<sub>B</sub><sup>-</sup>) λ(DE3 [lacI lacUV5-T7p07 ind1 sam7 nin5]) [malB<sup>+</sup>]<sub>K</sub>-12(λ<sup>S</sup>)</i> | <sup>9</sup>           |
| DH5α       | <i>F</i> <sup>-</sup> <i>endA1 glnV44 thi-1 recA1 relA1 gyrA96 deoR nupG purB20 φ80dlacZΔM15 Δ(lacZYA-argF)U169, hsdR17(r<sub>K</sub><sup>-</sup>m<sub>K</sub><sup>+</sup>), λ<sup>-</sup></i>                         | <sup>10</sup>          |

**Supplementary Table 2: Oligonucleotides used in this study.** All oligonucleotides ordered from Sigma/Merck (<https://www.sigmaaldrich.com/DE/de/configurators/tube?product=standard>).

| Primer                   | Sequence 5'→3'                                          |
|--------------------------|---------------------------------------------------------|
| QC_VsHdaH_H144A_fo       | gtcgtccgccgggtcatgcttgctggcc                            |
| QC_VsHdaH_H144A_rev      | ggccaggcaagcatgaccggcgacgac                             |
| QC_RsPrpH_H143A_fo       | gccggccatgctgtctgccggatac                               |
| QC_RsPrpH_H143A_rev      | gtatccggcagacagggcatggccggc                             |
| QC_RwDmhA_H143A_fo       | ggcaggatcatgctgtggcagatac                               |
| QC_RwDmhA_H143A_rev      | gtatctgccagacatgatgacctgcc                              |
| QC_VcHdaH_H126A_fo       | gtggttatcatgcccccattgacagac                             |
| QC_VcHdaH_H126A_rev      | gtctgatggggggcatgataaccac                               |
| QC_ApaHD3_H159A_fo       | ccgggcatgacagcagcaagtgtattatg                           |
| QC_ApaHD3_H159A_rev      | cataacatcacttctgctgatggcccg                             |
| QC_LcApaH_E_H179A_fo     | cgacctatgacgacctcgagatgaag                              |
| QC_LcApaH_E_H179A_rev    | cttcattctgcaaggctgatgggtcg                              |
| QC_LpApaH_H181A_fo       | gccgagccatgccgctataccc                                  |
| QC_LpApaH_H181A_rev      | gtataggcggcatggctcggc                                   |
| Gi_pOPIN_fo              | gttatgaagggtcagcccgttagaccatttaaacaccac                 |
| Gi_pOPIN_rev             | ctatacacactcagcataccgtaccaccgatctgttc                   |
| Gi_PA1409_fo             | cagatcgggtggtaccggatgctgagtgtatagcg                     |
| Gi_PA1409_rev            | ggtggtgttaaatgtctaacgggctgcaccttc                       |
| QC_PsApaH_1-342_Stop_fo  | gaaaatgtgtaacgtccgaataatagtaaaaaag                      |
| QC_PsApaH_1-342_Stop_rev | ctattattcggacgttacacatttccaag                           |
| Insert_LpApaH_28-426_fo  | tgtgcaattcagattccgag                                    |
| Insert_LpApaH_28-426_rev | ggtaccacagctgatggtg                                     |
| Gi_LpApaH_28-426_fo      | catcaccacagccaggatccgtgtgcaattcagattccgag               |
| Gi_LpApaH_28-426_rev     | gcggtttctttaccagactcgagggtaccgctcgagtagtaactcatactatgac |
| Gi_pRSF-Duet_Lp_fo       | gtatgagttactaactcgagcggtagccctcgagctggttaaagaac         |
| Gi_pRSF-Duet_Lp_rev      | gctcggaatctgaattgcacacggatcctggctgtggtgatg              |
| QC_LpApaH_L414Stop_fo    | gtgattgaaaaacagtaactgccgaaag                            |
| QC_LpApaH_L414Stop_rev   | ctatcttcggcagttactgtttttcaatc                           |
| Insert_LcApaH_22-434_fo  | tgtctgatccagattccgag                                    |
| Insert_LcApaH_22-434_rev | ggtaccacagctgatggtg                                     |
| Gi_LcApaH_22-434_fo      | caccacagccaggatccgaattgtctgatccagattccgagtgcc           |
| Gi_LcApaH_22-434_rev     | cggtttctttaccagactcgagttacgggctgctggtttgccc             |
| Gi_pRSF-Duet_Lc_fo       | gcaaaaccagcagcccgttaactcgagctggttaaagaaccgctg           |
| Gi_pRSF-Duet_Lc_rev      | ctcggaatctggatcagacaattcggatcctggctgtggtg               |
| QC_LcApaH_N409Stop_fo    | gagcattgttctgtaagatctggttc                              |
| QC_LcApaH_N409Stop_rev   | ctgatgaaccagatcttacagaacaatg                            |

**Supplementary Table 3: Peptide substrates with various acyl-chains used in this study.** The peptide backbone was derived from histone H3 (APRK<sub>acyl</sub>, H3<sub>15-18</sub> or TARK<sub>acyl</sub>, H3<sub>6-9</sub>), histone H4 (LGK<sub>acyl</sub>, H4<sub>10-12</sub>) tumor suppressor protein p53 (QPKK<sub>acyl</sub>, p53<sub>317-320</sub>) or DLAT (Dihydrolipoyllysine-residue acetyltransferase component of pyruvate dehydrogenase complex; ETDK<sub>acyl</sub>; DLAT<sub>256-259</sub>). The C-terminal lysine side chain carried various acyl-chain types, i.e. acetyl (C-2; K<sub>ac</sub>), propionyl (C-3; K<sub>pro</sub>), butyryl (C-4; K<sub>but</sub>), hexanoly (C-6; K<sub>hex</sub>), octanoyl (C-8; K<sub>oct</sub>), decanoyl (C-10; K<sub>dec</sub>), lauroyl (C-10; K<sub>lau</sub>), myristoyl (C-12; K<sub>myr</sub>), palmitoyl (C-14; K<sub>pal</sub>), crotonyl (K<sub>cro</sub>), L-lactyl (K<sub>L-la</sub>), D-β-hydroxybutyryl (K<sub>D-bhb</sub>), succinyl (K<sub>suc</sub>), glutaryl (K<sub>glu</sub>) and biotinyl (K<sub>bio</sub>). The references are given.

| Shorthand  | Sequence                               | Source                                           |
|------------|----------------------------------------|--------------------------------------------------|
| LGKac      | Ac-Leu-Gly-Lys(Ac)-AMC                 | Bradner <i>et al.</i> , 2010 <sup>11</sup>       |
| QPKKac     | Ac-Gln-Pro-Lys-Lys(Ac)-AMC             | Madsen <i>et al.</i> , 2016 <sup>12</sup>        |
| APRKac     | Ac-Ala-Pro-Arg-Lys(Ac)-AMC             | Moreno-Yruela <i>et al.</i> , 2022 <sup>13</sup> |
| ETDKac     | Ac-Glu-Thr-Asp-Lys(Ac)-AMC             | Galleano <i>et al.</i> , 2016                    |
| LGKpro     | Ac-Leu-Gly-Lys(Pro)-AMC                | Olesen <i>et al.</i> , 2018 <sup>14</sup>        |
| LGKbut     | Ac-Leu-Gly-Lys(But)-AMC                | Olesen <i>et al.</i> , 2018 <sup>14</sup>        |
| QPKKhex    | Ac-Gln-Pro-Lys-Lys(Hex)-AMC            | Madsen <i>et al.</i> , 2016 <sup>12</sup>        |
| QPKKoct    | Ac-Gln-Pro-Lys-Lys(Oct)-AMC            | Madsen <i>et al.</i> , 2016 <sup>12</sup>        |
| QPKKdec    | Ac-Gln-Pro-Lys-Lys(Dec)-AMC            | Madsen <i>et al.</i> , 2016 <sup>12</sup>        |
| TARKdec    | Ac-Thr-Ala-Arg-Lys(Dec)-AMC            | Madsen <i>et al.</i> , 2016 <sup>12</sup>        |
| ETDKdec    | Ac-Glu-Thr-Asp-Lys(Dec)-AMC            | Galleano <i>et al.</i> , 2016                    |
| QPKKlau    | Ac-Gln-Pro-Lys-Lys(Lau)-AMC            | Madsen <i>et al.</i> , 2016 <sup>12</sup>        |
| QPKKmyr    | Ac-Gln-Pro-Lys-Lys(Myrist)-AMC         | Madsen <i>et al.</i> , 2016 <sup>12</sup>        |
| TARKmyr    | Ac-Thr-Ala-Arg-Lys(Myrist)-AMC         | Madsen <i>et al.</i> , 2016 <sup>12</sup>        |
| ETDKmyr    | Ac-Glu-Thr-Asp-Lys(Myrist)-AMC         | Galleano <i>et al.</i> , 2016                    |
| QPKKpal    | Ac-Gln-Pro-Lys-Lys(Pal)-AMC            | Madsen <i>et al.</i> , 2016 <sup>12</sup>        |
| LGKcr      | Ac-Leu-Gly-Lys(Croton)-AMC             | Madsen <i>et al.</i> , 2012a <sup>15</sup>       |
| LGK(L-la)  | Ac-Leu-Gly-Lys(L-lactyl)-AMC           | Moreno-Yruela <i>et al.</i> , 2022 <sup>13</sup> |
| LGK(D-la)  | Ac-Leu-Gly-Lys(D-lactyl)-AMC           | Moreno-Yruela <i>et al.</i> , 2022 <sup>13</sup> |
| QPKK(L-la) | Ac-Gln-Pro-Lys-Lys(L-lactyl)-AMC       | Moreno-Yruela <i>et al.</i> , 2022 <sup>13</sup> |
| QPKK(D-la) | Ac-Gln-Pro-Lys-Lys(D-lactyl)-AMC       | Moreno-Yruela <i>et al.</i> , 2022 <sup>13</sup> |
| LGK(D-bhb) | Ac-Leu-Gly-Lys(D-β-hydroxybutyryl)-AMC | Moreno-Yruela <i>et al.</i> , 2022 <sup>13</sup> |
| LGKsuc     | Ac-Leu-Gly-Lys(Succinyl)-AMC           | Madsen <i>et al.</i> , 2012b <sup>16</sup>       |
| LGKglu     | Ac-Leu-Gly-Lys(Glutaryl)-AMC           | Anderson <i>et al.</i> , 2017 <sup>17</sup>      |
| LGKbio     | Ac-Leu-Gly-Lys(Biotinyl)-AMC           | Moreno-Yruela <i>et al.</i> , 2018 <sup>18</sup> |

**Supplementary Table 4: Crystallization of the enzymes and complexes crystallized in this study.** Shown are the enzymes of different sub-clusters, the crystallization conditions, the cryoprotectant used to freeze the crystals in liquid nitrogen, the time needed until crystals were observed (in days) and the time at which the crystals were harvested. The PDB code is shown under which the structures are deposited in the protein data bank (PDB; <https://www.rcsb.org/>).

| <b>Protein</b>                      | <b>condition</b>                                                                              | <b>Cryo-protection</b>                                                                                               | <b>Crystals observed</b> | <b>Harvested</b>                 | <b>PDB entry</b> |
|-------------------------------------|-----------------------------------------------------------------------------------------------|----------------------------------------------------------------------------------------------------------------------|--------------------------|----------------------------------|------------------|
| <i>KpHdaH</i> (1b)                  | 12% (w/v) PEG 8000, 10% (v/v) glycerol and 0.5M KCl                                           | with additional 10% glycerol                                                                                         | overnight                | overnight                        | 9GLB             |
| <i>KpHdaH</i> H144A (1b)            | 12% (w/v) PEG 8000, 10% (v/v) glycerol and 0.5M KCl                                           | with additional 10% glycerol                                                                                         | overnight                | overnight                        | 9GN1             |
| <i>KpHdaH</i> (1b)•SAHA             | 12% (w/v) PEG 8000, 10% (v/v) glycerol and 0.5M KCl                                           | with additional 10% glycerol                                                                                         | overnight                | overnight following soaking (1h) | 9GN6             |
| <i>KpHdaH</i> (1b)•TSA              | 12% (w/v) PEG 8000, 10% (v/v) glycerol and 0.5M KCl                                           | with additional 10% glycerol                                                                                         | overnight                | overnight following soaking (1h) | 9GN7             |
| <i>RsPrpH</i> (1b)                  | 4% tacsimate pH 6<br>12% (w/v) PEG3350                                                        | with saturated glucose                                                                                               | 5 days                   | 16 days                          | 9GKU             |
| <i>RwDmhA</i> (1b)                  | 0.2 M KF pH 7.3 and 20% (w/v) PEG3350                                                         | with 15% (w/v) PEG400                                                                                                | 4 days                   | 7 days                           | 9GKW             |
| <i>RwDmhA</i> (1b)•SAHA             | 0.2 M NaF pH 7.3<br>20% (w/v) PEG3350                                                         | with saturated glucose                                                                                               | 3 days                   | 5 days                           | 9GKX             |
| <i>VcHdaH</i> (5b)                  | 1 M Na/K tartrate,<br>0.1 M imidazole pH 8<br>0.2 M NaCl                                      | with saturated glucose                                                                                               | 9 days                   | 14 days                          | 9GKY             |
| <i>VcHdaH</i> (5b)•SAHA             | 1.4 M sodium acetate<br>0.1 M MES pH 6.5                                                      | with saturated glucose                                                                                               | 12 days                  | 20 days                          | 9GKV             |
| <i>PsApaH</i> <sub>1-342</sub> (4)  | 0.1 M sodium acetate pH 4.5<br>20% (w/v) PEG3000                                              | with 15% (w/v) PEG400                                                                                                | 10 days                  | 29 days                          | 9GKZ             |
| <i>LcApaH</i> <sub>22-409</sub> (3) | 1 M (NH <sub>4</sub> ) <sub>2</sub> SO <sub>4</sub><br>5% (w/v) PEG400<br>0.1 M Na-MES pH 6.5 | 2 M (NH <sub>4</sub> ) <sub>2</sub> SO <sub>4</sub><br>10% (w/v) PEG400<br>0.1 M Na-MES pH 6.5<br>12% (v/v) glycerol | 26 days                  | 30 days                          | 9GL0             |
| <i>LpApaH</i> (3)                   | 0.2 M calcium acetate<br>0.1 M HEPES pH 7.5,<br>18% (w/v) PEG8000                             | with 12% (w/v) PEG400                                                                                                | 6 days                   | 11 days                          | 9GL1             |

**Supplementary Table 5: Data collection and refinement statistics (molecular replacement) for the *KpHdaH* (1b) wildtype structure of cluster 1b enzymes and for the catalytically inactive mutant *KpHdaH* (1b) H144A structure.**

|                                                                  | <i>KpHdaH</i> (1b) (PDB: <a href="https://doi.org/10.2210/pdb9GLB/pdb">9GLB</a><br>[https://doi.org/10.2210/pdb9GLB/pdb]) | <i>KpHdaH</i> (1b) H144A (PDB: <a href="https://doi.org/10.2210/pdb9GLN1/pdb">9GN1</a><br>[https://doi.org/10.2210/pdb9GLN1/pdb]) |
|------------------------------------------------------------------|---------------------------------------------------------------------------------------------------------------------------|-----------------------------------------------------------------------------------------------------------------------------------|
| <b>Data collection</b>                                           |                                                                                                                           |                                                                                                                                   |
| Space group                                                      | I 2 3                                                                                                                     | I 2 3                                                                                                                             |
| Cell dimensions                                                  |                                                                                                                           |                                                                                                                                   |
| <i>a</i> , <i>b</i> , <i>c</i> (Å)                               | 147.163 147.163 147.163                                                                                                   | 146.117 146.117 146.117                                                                                                           |
| $\alpha$ , $\beta$ , $\gamma$ (°)                                | 90.0 90.0 90.0                                                                                                            | 90.0 90.0 90.0                                                                                                                    |
| Resolution (Å)                                                   | 25.24 - 2.1 (2.175 - 2.1) * <sup>1</sup>                                                                                  | 46.21 - 2.35 (2.434 - 2.35) * <sup>2</sup>                                                                                        |
| <i>R</i> <sub>merge</sub> (%) <sup>a</sup>                       | 14.14 (24.13)                                                                                                             | 2.628 (23.49)                                                                                                                     |
| <i>I</i> / $\sigma$ <i>I</i>                                     | 15.77 (1.14)                                                                                                              | 13.44 (1.46)                                                                                                                      |
| Completeness (%)                                                 | 99.84 (99.94)                                                                                                             | 99.88 (99.91)                                                                                                                     |
| Redundancy                                                       | 19.9 (20.4)                                                                                                               | 22.6 (22.5)                                                                                                                       |
| <b>Refinement</b>                                                |                                                                                                                           |                                                                                                                                   |
| Resolution (Å)                                                   | 2.1                                                                                                                       | 2.35                                                                                                                              |
| No. reflections                                                  | 30973 (3080)                                                                                                              | 21754 (1152)                                                                                                                      |
| <i>R</i> <sub>work</sub> / <i>R</i> <sub>free</sub> <sup>b</sup> | 0.1496 (0.2466) /<br>0.1784 (0.2710)                                                                                      | 0.1533 (0.2633) /<br>0.2042 (0.3170)                                                                                              |
| No. atoms                                                        | 3071                                                                                                                      | 2973                                                                                                                              |
| Protein                                                          | 2818                                                                                                                      | 2815                                                                                                                              |
| Ligand/ion                                                       | 25                                                                                                                        | 21                                                                                                                                |
| Water                                                            | 239                                                                                                                       | 137                                                                                                                               |
| No. protein residues                                             | 370                                                                                                                       | 370                                                                                                                               |
| Ramachandran Plot (%) <sup>c</sup>                               |                                                                                                                           |                                                                                                                                   |
| Most favored                                                     | 95.65                                                                                                                     | 92.93                                                                                                                             |
| Additionaly allowed                                              | 3.53                                                                                                                      | 4.89                                                                                                                              |
| Disfavored                                                       | 0.82                                                                                                                      | 2.17                                                                                                                              |
| Clashscore                                                       | 4.12                                                                                                                      | 6.09                                                                                                                              |
| <i>B</i> -factors                                                | 51.10                                                                                                                     | 48.21                                                                                                                             |
| Protein                                                          | 50.65                                                                                                                     | 47.80                                                                                                                             |
| Ligand/ion                                                       | 70.88                                                                                                                     | 56.84                                                                                                                             |
| Water                                                            | 55.27                                                                                                                     | 41.93                                                                                                                             |
| R.m.s. deviations                                                |                                                                                                                           |                                                                                                                                   |
| Bond lengths (Å)                                                 | 0.004                                                                                                                     | 0.013                                                                                                                             |
| Bond angles (°)                                                  | 0.66                                                                                                                      | 2.30                                                                                                                              |

\*<sup>1</sup> One crystal was used to solve the *KpHdaH* (1b) WT structure by molecular replacement.

\*<sup>2</sup> One crystal was used to solve the structure of *KpHdaH* (1b) H144A by molecular replacement.

a:  $R_{\text{merge}} = \frac{\sum_{\text{hkl}} \sum_{i=1}^n |I_i(\text{hkl}) - \bar{I}(\text{hkl})|}{\sum_{\text{hkl}} \sum_{i=1}^n I_i(\text{hkl})}$  where  $I_i(\text{hkl})$  is the measured intensity of the reflection *i* at position *hkl* and  $\bar{I}(\text{hkl})$  is the average intensity of the reflection(s) at position *hkl*<sup>19</sup>.

b:  $R_{\text{work}} = \frac{\sum |F_o - F_c|}{\sum F_o}$  where  $F_o$  and  $F_c$  are the observed and calculated structure factor amplitudes. *R*<sub>free</sub> is calculated similarly to *R*<sub>work</sub> using random 5% of working set of reflections<sup>20</sup>.

c: MolProbity<sup>21</sup>.

**Supplementary Table 6: Data collection and refinement statistics (molecular replacement) for the hydroxamate inhibitor complexes *KpHdaH* (1b)•SAHA and *KpHdaH* (1b)•TSA.**

|                                                                  | <i>KpHdaH</i> (1b)•SAHA (PDB:<br><a href="https://doi.org/10.2210/pdb9GN6/pdb">9GN6</a><br>[https://doi.org/10.2210/pdb9GN6/pdb] ) | <i>KpHdaH</i> (1b)•TSA (PDB:<br><a href="https://doi.org/10.2210/pdb9GN7/pdb">9GN7</a><br>[https://doi.org/10.2210/pdb9GN7/pdb] ) |
|------------------------------------------------------------------|------------------------------------------------------------------------------------------------------------------------------------|-----------------------------------------------------------------------------------------------------------------------------------|
| <b>Data collection</b>                                           |                                                                                                                                    |                                                                                                                                   |
| Space group                                                      | I 2 3                                                                                                                              | I 2 3                                                                                                                             |
| Cell dimensions                                                  |                                                                                                                                    |                                                                                                                                   |
| <i>a, b, c</i> (Å)                                               | 146.206 146.206 146.206                                                                                                            | 146.57 146.57 146.57                                                                                                              |
| $\alpha, \beta, \gamma$ (°)                                      | 90.0 90.0 90.0                                                                                                                     | 90.0 90.0 90.0                                                                                                                    |
| Resolution (Å)                                                   | 42.21 - 1.95 (2.02 - 1.95) * <sup>1</sup>                                                                                          | 46.35 - 2.18 (2.258 - 2.18) * <sup>2</sup>                                                                                        |
| <i>R</i> <sub>merge</sub> (%) <sup>a</sup>                       | 11.63 (37.52)                                                                                                                      | 2.781 (28.25)                                                                                                                     |
| <i>I</i> / $\sigma$ <i>I</i>                                     | 22.62 (1.25)                                                                                                                       | 12.16 (2.58)                                                                                                                      |
| Completeness (%)                                                 | 99.97 (100.00)                                                                                                                     | 99.97 (99.96)                                                                                                                     |
| Redundancy                                                       | 39.5 (41.2)                                                                                                                        | 2.0 (2.0)                                                                                                                         |
| <b>Refinement</b>                                                |                                                                                                                                    |                                                                                                                                   |
| Resolution (Å)                                                   | 1.95                                                                                                                               | 2.18                                                                                                                              |
| No. reflections                                                  | 37871 (2629)                                                                                                                       | 27454 (2367)                                                                                                                      |
| <i>R</i> <sub>work</sub> / <i>R</i> <sub>free</sub> <sup>b</sup> | 0.1373 (0.2950)/<br>0.1756 (0.3161)                                                                                                | 0.1478 (0.2210)/<br>0.1862 (0.2390)                                                                                               |
| No. atoms                                                        | 3081                                                                                                                               | 2985                                                                                                                              |
| Protein                                                          | 2827                                                                                                                               | 2822                                                                                                                              |
| Ligand/ion                                                       | 22                                                                                                                                 | 44                                                                                                                                |
| Water                                                            | 232                                                                                                                                | 119                                                                                                                               |
| No. protein residues                                             | 369                                                                                                                                | 369                                                                                                                               |
| Ramachandran Plot (%) <sup>c</sup>                               |                                                                                                                                    |                                                                                                                                   |
| Most favored                                                     | 95.11                                                                                                                              | 94.29                                                                                                                             |
| Additionallly allowed                                            | 4.35                                                                                                                               | 5.16                                                                                                                              |
| Disfavored                                                       | 0.54                                                                                                                               | 0.54                                                                                                                              |
| Clashscore                                                       | 2.49                                                                                                                               | 2.65                                                                                                                              |
| <i>B</i> -factors                                                | 48.60                                                                                                                              | 43.95                                                                                                                             |
| Protein                                                          | 48.38                                                                                                                              | 43.23                                                                                                                             |
| Ligand/ion                                                       | 53.06                                                                                                                              | 59.37                                                                                                                             |
| Water                                                            | 56.12                                                                                                                              | 41.49                                                                                                                             |
| R.m.s. deviations                                                |                                                                                                                                    |                                                                                                                                   |
| Bond lengths (Å)                                                 | 0.012                                                                                                                              | 0.014                                                                                                                             |
| Bond angles (°)                                                  | 1.94                                                                                                                               | 2.24                                                                                                                              |

\*<sup>1</sup> One crystal was used to solve the *KpHdaH* (1b)•SAHA structure by molecular replacement.

\*<sup>2</sup> One crystal was used to solve the *KpHdaH* (1b)•TSA structure by molecular replacement.

a:  $R_{\text{merge}} = \frac{\sum_{\text{hkl}} \sum_{i=1}^n |I_i(\text{hkl}) - \bar{I}(\text{hkl})|}{\sum_{\text{hkl}} \sum_{i=1}^n I_i(\text{hkl})}$  where  $I_i(\text{hkl})$  is the measured intensity of the reflection *i* at position *hkl* and  $\bar{I}(\text{hkl})$  is the average intensity of the reflection(s) at position *hkl*<sup>19</sup>.

b:  $R_{\text{work}} = \frac{\sum |F_o - F_c|}{\sum F_o}$  where  $F_o$  and  $F_c$  are the observed and calculated structure factor amplitudes.  $R_{\text{free}}$  is calculated similarly to  $R_{\text{work}}$  using random 5% of working set of reflections<sup>20</sup>.

c: MolProbity<sup>21</sup>.

**Supplementary Table 7: Data collection and refinement statistics (molecular replacement) for the *RwDmhA* (1b) octanoic acid structure and for the hydroxamate inhibitor complex *RwDmhA* (1b)•SAHA.**

|                                                                  | <i>RwDmhA</i> (PDB: <a href="https://doi.org/10.2210/pdb/9GKW/pdb">9GKW</a><br>[https://doi.org/10.2210/pdb/9GKW/pdb]) | <i>RwDmhA</i> •SAHA (PDB: <a href="https://doi.org/10.2210/pdb/9GKX/pdb">9GKX</a><br>[https://doi.org/10.2210/pdb/9GKX/pdb]) |
|------------------------------------------------------------------|------------------------------------------------------------------------------------------------------------------------|------------------------------------------------------------------------------------------------------------------------------|
| <b>Data collection</b>                                           |                                                                                                                        |                                                                                                                              |
| Space group                                                      | C 1 2 1                                                                                                                | C 1 2 1                                                                                                                      |
| Cell dimensions                                                  |                                                                                                                        |                                                                                                                              |
| <i>a</i> , <i>b</i> , <i>c</i> (Å)                               | 131.62 144.03 92.96                                                                                                    | 132.12 144.96 92.66                                                                                                          |
| $\alpha$ , $\beta$ , $\gamma$ (°)                                | 90.0 92.1 90.0                                                                                                         | 90.0 91.81 90.0                                                                                                              |
| Resolution (Å)                                                   | 54.64 - 2.1 (2.12 - 2.1) * <sup>1</sup>                                                                                | 46.31 - 1.75 (1.79 - 1.75) * <sup>2</sup>                                                                                    |
| <i>R</i> <sub>merge</sub> (%) <sup>a</sup>                       | 20.26 (97.36)                                                                                                          | 19.51 (146.3)                                                                                                                |
| <i>I</i> / $\sigma$ <i>I</i>                                     | 7.26 (1.57)                                                                                                            | 4.90 (0.64)                                                                                                                  |
| Completeness (%)                                                 | 84.54 (85.80)                                                                                                          | 99.70 (99.05)                                                                                                                |
| Redundancy                                                       | 4.6 (4.3)                                                                                                              | 3.5 (3.3)                                                                                                                    |
| <b>Refinement</b>                                                |                                                                                                                        |                                                                                                                              |
| Resolution (Å)                                                   | 2.1                                                                                                                    | 1.75                                                                                                                         |
| No. reflections                                                  | 393612 (18427)                                                                                                         | 174373 (11513)                                                                                                               |
| <i>R</i> <sub>work</sub> / <i>R</i> <sub>free</sub> <sup>b</sup> | 0.1719 (0.239)/                                                                                                        | 0.1626 (0.3732)/                                                                                                             |
|                                                                  | 0.2173 (0.273)                                                                                                         | 0.1903 (0.4108)                                                                                                              |
| No. atoms                                                        | 12389                                                                                                                  | 13142                                                                                                                        |
| Protein                                                          | 11187                                                                                                                  | 11200                                                                                                                        |
| Ligand/ion                                                       | 102                                                                                                                    | 162                                                                                                                          |
| Water                                                            | 1100                                                                                                                   | 1780                                                                                                                         |
| No. protein residues                                             | 1469                                                                                                                   | 1464                                                                                                                         |
| Ramachandran Plot (%) <sup>c</sup>                               |                                                                                                                        |                                                                                                                              |
| Most favored                                                     | 97.40                                                                                                                  | 97.25                                                                                                                        |
| Additionally allowed                                             | 2.40                                                                                                                   | 2.75                                                                                                                         |
| Disfavored                                                       | 0.21                                                                                                                   | 0.00                                                                                                                         |
| Clashscore                                                       | 7.45                                                                                                                   | 3.43                                                                                                                         |
| <i>B</i> -factors                                                | 20.69                                                                                                                  | 21.94                                                                                                                        |
| Protein                                                          | 19.75                                                                                                                  | 19.92                                                                                                                        |
| Ligand/ion                                                       | 52.53                                                                                                                  | 28.69                                                                                                                        |
| Water                                                            | 27.34                                                                                                                  | 34.03                                                                                                                        |
| R.m.s. deviations                                                |                                                                                                                        |                                                                                                                              |
| Bond lengths (Å)                                                 | 0.027                                                                                                                  | 0.007                                                                                                                        |
| Bond angles (°)                                                  | 2.21                                                                                                                   | 0.85                                                                                                                         |

\*<sup>1</sup> One crystal was used to solve the *RwDmhA* structure by molecular replacement.

\*<sup>2</sup> One crystal was used to solve the *RwDmhA*•SAHA structure by molecular replacement.

a:  $R_{\text{merge}} = \frac{\sum_{\text{hkl}} \sum_{i=1}^n |I_i(\text{hkl}) - \bar{I}(\text{hkl})|}{\sum_{\text{hkl}} \sum_{i=1}^n I_i(\text{hkl})}$  where  $I_i(\text{hkl})$  is the measured intensity of the reflection *i* at position *hkl* and  $\bar{I}(\text{hkl})$  is the average intensity of the reflection(s) at position *hkl*<sup>19</sup>.

b:  $R_{\text{work}} = \frac{\sum |F_o - F_c|}{\sum F_o}$  where  $F_o$  and  $F_c$  are the observed and calculated structure factor amplitudes.  $R_{\text{free}}$  is calculated similarly to  $R_{\text{work}}$  using random 5% of working set of reflections<sup>20</sup>.

c: MolProbity<sup>21</sup>.

**Supplementary Table 8: Data collection and refinement statistics (molecular replacement) for the apo-structure of *VcHdaH* (5b) and for the hydroxamate inhibitor complex *VcHdaH* (5b)•SAHA.**

|                                                                  | <i>VcHdaH</i> (5b) (PDB: <a href="https://doi.org/10.2210/pdb9GKY/pdb">9GKY</a> [ <a href="https://doi.org/10.2210/pdb9GKY/pdb">https://doi.org/10.2210/pdb9GKY/pdb</a> ]) | <i>VcHdaH</i> (5b)•SAHA (PDB: <a href="https://doi.org/10.2210/pdb9GKV/pdb">9GKV</a> [ <a href="https://doi.org/10.2210/pdb9GKV/pdb">https://doi.org/10.2210/pdb9GKV/pdb</a> ]) |
|------------------------------------------------------------------|----------------------------------------------------------------------------------------------------------------------------------------------------------------------------|---------------------------------------------------------------------------------------------------------------------------------------------------------------------------------|
| <b>Data collection</b>                                           |                                                                                                                                                                            |                                                                                                                                                                                 |
| Space group                                                      | P 1 21 1                                                                                                                                                                   | P 21 21 21                                                                                                                                                                      |
| Cell dimensions                                                  |                                                                                                                                                                            |                                                                                                                                                                                 |
| <i>a</i> , <i>b</i> , <i>c</i> (Å)                               | 51.11 51.15 108.82                                                                                                                                                         | 50.92 81.53 133.17                                                                                                                                                              |
| $\alpha$ , $\beta$ , $\gamma$ (°)                                | 90.0 102.22 90.0                                                                                                                                                           | 90.0 90.0 90.0                                                                                                                                                                  |
| Resolution (Å)                                                   | 26.39 - 1.129 (1.14 - 1.13) *1                                                                                                                                             | 40.45 - 1.643 (1.68 - 1.64) *2                                                                                                                                                  |
| <i>R</i> <sub>merge</sub> (%) <sup>a</sup>                       | 5.977 (188.8)                                                                                                                                                              | 10.44 (180.9)                                                                                                                                                                   |
| <i>I</i> / $\sigma$ <i>I</i>                                     | 5.56 (0.36)                                                                                                                                                                | 7.31 (0.23)                                                                                                                                                                     |
| Completeness (%)                                                 | 94.57 (84.52)                                                                                                                                                              | 77.17 (11.89)                                                                                                                                                                   |
| Redundancy                                                       | 1.9 (1.9)                                                                                                                                                                  | 5.4 (1.6)                                                                                                                                                                       |
| <b>Refinement</b>                                                |                                                                                                                                                                            |                                                                                                                                                                                 |
| Resolution (Å)                                                   | 1.13                                                                                                                                                                       | 1.64                                                                                                                                                                            |
| No. reflections                                                  | 194387 (5740)                                                                                                                                                              | 52756 (531)                                                                                                                                                                     |
| <i>R</i> <sub>work</sub> / <i>R</i> <sub>free</sub> <sup>b</sup> | 0.1576 (0.357)/<br>0.1789 (0.364)                                                                                                                                          | 0.2081 (0.563)/<br>0.2130 (0.558)                                                                                                                                               |
| No. atoms                                                        | 6006                                                                                                                                                                       | 5335                                                                                                                                                                            |
| Protein                                                          | 5148                                                                                                                                                                       | 4935                                                                                                                                                                            |
| Ligand/ion                                                       | 62                                                                                                                                                                         | 37                                                                                                                                                                              |
| Water                                                            | 796                                                                                                                                                                        | 363                                                                                                                                                                             |
| No. protein residues                                             | 621                                                                                                                                                                        | 618                                                                                                                                                                             |
| Ramachandran Plot (%) <sup>c</sup>                               |                                                                                                                                                                            |                                                                                                                                                                                 |
| Most favored                                                     | 98.06                                                                                                                                                                      | 97.39                                                                                                                                                                           |
| Additionalily allowed                                            | 1.94                                                                                                                                                                       | 2.61                                                                                                                                                                            |
| Disfavored                                                       | 0.00                                                                                                                                                                       | 0.00                                                                                                                                                                            |
| Clashscore                                                       | 5.86                                                                                                                                                                       | 4.57                                                                                                                                                                            |
| <i>B</i> -factors                                                |                                                                                                                                                                            |                                                                                                                                                                                 |
| Protein                                                          | 14.14                                                                                                                                                                      | 29.85                                                                                                                                                                           |
| Ligand/ion                                                       | 11.71                                                                                                                                                                      | 29.12                                                                                                                                                                           |
| Water                                                            | 16.72                                                                                                                                                                      | 48.57                                                                                                                                                                           |
| Water                                                            | 29.67                                                                                                                                                                      | 37.96                                                                                                                                                                           |
| R.m.s. deviations                                                |                                                                                                                                                                            |                                                                                                                                                                                 |
| Bond lengths (Å)                                                 | 0.013                                                                                                                                                                      | 0.014                                                                                                                                                                           |
| Bond angles (°)                                                  | 1.66                                                                                                                                                                       | 2.12                                                                                                                                                                            |

\*1 One crystal was used to solve the *VcHdaH* (5b) structure by molecular replacement.

\*2 One crystal was used to solve the structure of *VcHdaH* (5b)•SAHA by molecular replacement.

a:  $R_{\text{merge}} = \frac{\sum_{\text{hkl}} \sum_{i=1}^n |I_i(\text{hkl}) - \bar{I}(\text{hkl})|}{\sum_{\text{hkl}} \sum_{i=1}^n I_i(\text{hkl})}$  where  $I_i(\text{hkl})$  is the measured intensity of the reflection *i* at position *hkl* and  $\bar{I}(\text{hkl})$  is the average intensity of the reflection(s) at position *hkl*<sup>19</sup>.

b:  $R_{\text{work}} = \frac{\sum |F_o - F_c|}{\sum F_o}$  where  $F_o$  and  $F_c$  are the observed and calculated structure factor amplitudes.  $R_{\text{free}}$  is calculated similarly to  $R_{\text{work}}$  using random 5% of working set of reflections<sup>20</sup>.

c: MolProbity<sup>21</sup>.



**Supplementary Table 9: Data collection and refinement statistics (molecular replacement) for the *RsPrpH* (1b) structure and for the *PsApaH* (4) structure.**

|                                                                  | <i>RsPrpH</i> (1b) (PDB: <a href="https://doi.org/10.2210/pdb9GKU/pdb">9GKU</a><br>[https://doi.org/10.2210/pdb9GKU/pdb]) | <i>PsApaH</i> <sub>1-342</sub> (4) (PDB: <a href="https://doi.org/10.2210/pdb9GKZ/pdb">9GKZ</a><br>[https://doi.org/10.2210/pdb9GKZ/pdb]) |
|------------------------------------------------------------------|---------------------------------------------------------------------------------------------------------------------------|-------------------------------------------------------------------------------------------------------------------------------------------|
| <b>Data collection</b>                                           |                                                                                                                           |                                                                                                                                           |
| Space group                                                      | P 1                                                                                                                       | P 21 21 2                                                                                                                                 |
| Cell dimensions                                                  |                                                                                                                           |                                                                                                                                           |
| <i>a</i> , <i>b</i> , <i>c</i> (Å)                               | 103.861 103.698 104.499                                                                                                   | 147.342 48.858 82.249                                                                                                                     |
| $\alpha$ , $\beta$ , $\gamma$ (°)                                | 113.6 93 120.61                                                                                                           | 90.0 90.0 90.0                                                                                                                            |
| Resolution (Å)                                                   | 44.56 - 1.481 (1.5 - 1.48) * <sup>1</sup>                                                                                 | 73.67 - 2.716 (2.89 - 2.72) * <sup>2</sup>                                                                                                |
| <i>R</i> <sub>merge</sub> (%) <sup>a</sup>                       | 7.0 (137.3)                                                                                                               | 8.563 (49.85)                                                                                                                             |
| <i>I</i> / $\sigma$ <i>I</i>                                     | 9.1 (1.1)                                                                                                                 | 7.04 (1.22)                                                                                                                               |
| Completeness (%)                                                 | 90.8 (64.6)                                                                                                               | 99.90 (100.00)                                                                                                                            |
| Redundancy                                                       | 1.8 (1.5)                                                                                                                 | 2.0 (2.0)                                                                                                                                 |
| <b>Refinement</b>                                                |                                                                                                                           |                                                                                                                                           |
| Resolution (Å)                                                   | 1.48                                                                                                                      | 2.72                                                                                                                                      |
| No. reflections                                                  | 493363 (12890)                                                                                                            | 16666 (2708)                                                                                                                              |
| <i>R</i> <sub>work</sub> / <i>R</i> <sub>free</sub> <sup>b</sup> | 0.1528 (0.335)/<br>0.1834 (0.334)                                                                                         | 0.1556 (0.2166)/<br>0.2324 (0.2976)                                                                                                       |
| No. atoms                                                        | 24997                                                                                                                     | 5145                                                                                                                                      |
| Protein                                                          | 22739                                                                                                                     | 4986                                                                                                                                      |
| Ligand/ion                                                       | 188                                                                                                                       | 30                                                                                                                                        |
| Water                                                            | 2070                                                                                                                      | 129                                                                                                                                       |
| No. protein residues                                             | 2960                                                                                                                      | 642                                                                                                                                       |
| Ramachandran Plot (%) <sup>c</sup>                               |                                                                                                                           |                                                                                                                                           |
| Most favored                                                     | 96.60                                                                                                                     | 94.64                                                                                                                                     |
| Additionallly allowed                                            | 3.12                                                                                                                      | 5.36                                                                                                                                      |
| Disfavored                                                       | 0.27                                                                                                                      | 0.00                                                                                                                                      |
| Clashscore                                                       | 5.17                                                                                                                      | 7.92                                                                                                                                      |
| <i>B</i> -factors                                                | 28.54                                                                                                                     | 35.79                                                                                                                                     |
| Protein                                                          | 27.69                                                                                                                     | 35.82                                                                                                                                     |
| Ligand/ion                                                       | 36.43                                                                                                                     | 44.62                                                                                                                                     |
| Water                                                            | 37.26                                                                                                                     | 32.87                                                                                                                                     |
| R.m.s. deviations                                                |                                                                                                                           |                                                                                                                                           |
| Bond lengths (Å)                                                 | 0.013                                                                                                                     | 0.008                                                                                                                                     |
| Bond angles (°)                                                  | 1.70                                                                                                                      | 0.94                                                                                                                                      |

\*<sup>1</sup> One crystal was used to solve the *RsPrpH* (1b) structure by molecular replacement.

\*<sup>2</sup> One crystal was used to solve the structure of *PsApaH* (4) by molecular replacement.

a:  $R_{\text{merge}} = \frac{\sum_{\text{hkl}} \sum_{i=1}^n |I_i(\text{hkl}) - \bar{I}(\text{hkl})|}{\sum_{\text{hkl}} \sum_{i=1}^n I_i(\text{hkl})}$  where  $I_i(\text{hkl})$  is the measured intensity of the reflection *i* at position *hkl* and  $\bar{I}(\text{hkl})$  is the average intensity of the reflection(s) at position *hkl*<sup>19</sup>.

b:  $R_{\text{work}} = \frac{\sum |F_o - F_c|}{\sum F_o}$  where  $F_o$  and  $F_c$  are the observed and calculated structure factor amplitudes.  $R_{\text{free}}$  is calculated similarly to  $R_{\text{work}}$  using random 5% of working set of reflections<sup>20</sup>.

c: MolProbity<sup>21</sup>.

**Supplementary Table 10: Data collection and refinement statistics (molecular replacement) for the structure *LcApaH* and for the *LpApaH* structure, both enzymes classified into cluster 3.**

|                                                  | <i>LcApaH</i> (PDB: <a href="https://doi.org/10.2210/pdb9GL0/pdb">9GL0</a><br>[ <a href="https://doi.org/10.2210/pdb9GL0/pdb">https://doi.org/10.2210/pdb9GL0/pdb</a> ]) | <i>LpApaH</i> (PDB: <a href="https://doi.org/10.2210/pdb9GL1/pdb">9GL1</a><br>[ <a href="https://doi.org/10.2210/pdb9GL1/pdb">https://doi.org/10.2210/pdb9GL1/pdb</a> ]) |
|--------------------------------------------------|--------------------------------------------------------------------------------------------------------------------------------------------------------------------------|--------------------------------------------------------------------------------------------------------------------------------------------------------------------------|
| <b>Data collection</b>                           |                                                                                                                                                                          |                                                                                                                                                                          |
| Space group                                      | P 32 2 1                                                                                                                                                                 | P 41 2 2                                                                                                                                                                 |
| Cell dimensions                                  |                                                                                                                                                                          |                                                                                                                                                                          |
| <i>a, b, c</i> (Å)                               | 113.564 113.564 90.426                                                                                                                                                   | 109.121 109.121 400.511                                                                                                                                                  |
| $\alpha, \beta, \gamma$ (°)                      | 90.0 90.0 120.0                                                                                                                                                          | 90.0 90.0 90.0                                                                                                                                                           |
| Resolution (Å)                                   | 43.2 - 2.4 (2.43 - 2.4) * <sup>1</sup>                                                                                                                                   | 45.96 - 2.701 (2.73 - 2.7)                                                                                                                                               |
| $R_{\text{merge}}$ (%) <sup>a</sup>              | 9.656 (137.7)                                                                                                                                                            | 18.5 (365.9)                                                                                                                                                             |
| $I / \sigma I$                                   | 6.22 (0.45)                                                                                                                                                              | 4.85 (0.27)                                                                                                                                                              |
| Completeness (%)                                 | 98.59 (97.53)                                                                                                                                                            | 94.60 (27.26)                                                                                                                                                            |
| Redundancy                                       | 8.2 (1.4)                                                                                                                                                                | 10.3 (1.1)                                                                                                                                                               |
| <b>Refinement</b>                                |                                                                                                                                                                          |                                                                                                                                                                          |
| Resolution (Å)                                   | 2.4                                                                                                                                                                      | 2.7                                                                                                                                                                      |
| No. reflections                                  | 26336 (867)                                                                                                                                                              | 64002 (607)                                                                                                                                                              |
| $R_{\text{work}} / R_{\text{free}}$ <sup>b</sup> | 0.2373 (0.5791)/<br>0.2633 (0.5272)                                                                                                                                      | 0.2403 (0.6215)/<br>0.3160 (0.6736)                                                                                                                                      |
| No. atoms                                        | 3141                                                                                                                                                                     | 12721                                                                                                                                                                    |
| Protein                                          | 3130                                                                                                                                                                     | 12688                                                                                                                                                                    |
| Ligand/ion                                       | 3                                                                                                                                                                        | 15                                                                                                                                                                       |
| Water                                            | 8                                                                                                                                                                        | 18                                                                                                                                                                       |
| No. protein residues                             | 389                                                                                                                                                                      | 1568                                                                                                                                                                     |
| Ramachandran Plot (%) <sup>c</sup>               |                                                                                                                                                                          |                                                                                                                                                                          |
| Most favored                                     | 87.86                                                                                                                                                                    | 87.88                                                                                                                                                                    |
| Additionalally allowed                           | 10.86                                                                                                                                                                    | 9.87                                                                                                                                                                     |
| Disfavored                                       | 1.29                                                                                                                                                                     | 2.24                                                                                                                                                                     |
| Clashscore                                       | 21.44                                                                                                                                                                    | 17.53                                                                                                                                                                    |
| <i>B</i> -factors                                | 123.57                                                                                                                                                                   | 113.81                                                                                                                                                                   |
| Protein                                          | 123.60                                                                                                                                                                   | 113.83                                                                                                                                                                   |
| Ligand/ion                                       | 112.79                                                                                                                                                                   | 106.77                                                                                                                                                                   |
| Water                                            | 114.03                                                                                                                                                                   | 103.69                                                                                                                                                                   |
| R.m.s. deviations                                |                                                                                                                                                                          |                                                                                                                                                                          |
| Bond lengths (Å)                                 | 0.010                                                                                                                                                                    | 0.009                                                                                                                                                                    |
| Bond angles (°)                                  | 1.14                                                                                                                                                                     | 1.08                                                                                                                                                                     |

\*<sup>1</sup> One crystal was used to solve the *LcApaH* structure by molecular replacement.

\*<sup>2</sup> One crystal was used to solve the *LpApaH* structure by molecular replacement.

a:  $R_{\text{merge}} = \frac{\sum_{\text{hkl}} \sum_{i=1}^n |I_i(\text{hkl}) - \bar{I}(\text{hkl})|}{\sum_{\text{hkl}} \sum_{i=1}^n I_i(\text{hkl})}$  where  $I_i(\text{hkl})$  is the measured intensity of the reflection  $i$  at position  $\text{hkl}$  and  $\bar{I}(\text{hkl})$  is the average intensity of the reflection(s) at position  $\text{hkl}$ <sup>19</sup>.

b:  $R_{\text{work}} = \frac{\sum |F_o - F_c|}{\sum F_o}$  where  $F_o$  and  $F_c$  are the observed and calculated structure factor amplitudes.  $R_{\text{free}}$  is calculated similarly to  $R_{\text{work}}$  using random 5% of working set of reflections<sup>20</sup>.

c: MolProbity<sup>21</sup>.

## Supplementary References

1. Notredame, C., Higgins, D.G. & Heringa, J. T-Coffee: A novel method for fast and accurate multiple sequence alignment. *J Mol Biol* **302**, 205-17 (2000).
2. Robert, X. & Gouet, P. Deciphering key features in protein structures with the new ENDscript server. *Nucleic Acids Res* **42**, W320-4 (2014).
3. The PyMOL Molecular Graphics System, Version 3.0, Schrödinger, LLC.
4. Jurrus, E. et al. Improvements to the APBS biomolecular solvation software suite. *Protein Sci* **27**, 112-128 (2018).
5. Herring, C.D., Glasner, J.D. & Blattner, F.R. Gene replacement without selection: regulated suppression of amber mutations in *Escherichia coli*. *Gene* **311**, 153-63 (2003).
6. Wilksch, J.J. et al. MrkH, a novel c-di-GMP-dependent transcriptional activator, controls *Klebsiella pneumoniae* biofilm formation by regulating type 3 fimbriae expression. *PLoS Pathog* **7**, e1002204 (2011).
7. Brisse, S. et al. Virulent clones of *Klebsiella pneumoniae*: identification and evolutionary scenario based on genomic and phenotypic characterization. *PLoS One* **4**, e4982 (2009).
8. Nassif, X. & Sansonetti, P.J. Correlation of the virulence of *Klebsiella pneumoniae* K1 and K2 with the presence of a plasmid encoding aerobactin. *Infect Immun* **54**, 603-8 (1986).
9. Studier, F.W. & Moffatt, B.A. Use of bacteriophage T7 RNA polymerase to direct selective high-level expression of cloned genes. *J Mol Biol* **189**, 113-30 (1986).
10. Hanahan, D. DNA Cloning: A Practical Approach. *Glover, D. M. (ed.)* **1**, 109 (1985).
11. Bradner, J.E. et al. Chemical phylogenetics of histone deacetylases. *Nat Chem Biol* **6**, 238-243 (2010).
12. Madsen, A.S. et al. Investigating the Sensitivity of NAD<sup>+</sup>-dependent Sirtuin Deacetylation Activities to NADH. *J Biol Chem* **291**, 7128-41 (2016).
13. Moreno-Yruela, C. et al. Class I histone deacetylases (HDAC1-3) are histone lysine delactylases. *Sci Adv* **8**, eabi6696 (2022).
14. Olesen, S.V., Rajabi, N., Svensson, B., Olsen, C.A. & Madsen, A.S. An NAD(+)-Dependent Sirtuin Depropionylase and Deacetylase (Sir2La) from the Probiotic Bacterium *Lactobacillus acidophilus* NCFM. *Biochemistry* **57**, 3903-3915 (2018).
15. Madsen, A.S. & Olsen, C.A. Profiling of substrates for zinc-dependent lysine deacylase enzymes: HDAC3 exhibits decrotonylase activity in vitro. *Angew Chem Int Ed Engl* **51**, 9083-7 (2012).
16. Madsen, A.S. & Olsen, C.A. Substrates for efficient fluorometric screening employing the NAD-dependent sirtuin 5 lysine deacylase (KDAC) enzyme. *J Med Chem* **55**, 5582-90 (2012).
17. Anderson, K.A. et al. SIRT4 Is a Lysine Deacylase that Controls Leucine Metabolism and Insulin Secretion. *Cell Metab* **25**, 838-855 e15 (2017).
18. Moreno-Yruela, C., Galleano, I., Madsen, A.S. & Olsen, C.A. Histone Deacetylase 11 Is an epsilon-N-Myristoyllysine Hydrolase. *Cell Chem Biol* **25**, 849-856 e8 (2018).
19. Diederichs, K. & Karplus, P.A. Improved R-factors for diffraction data analysis in macromolecular crystallography. *Nat Struct Biol* **4**, 269-75 (1997).
20. Brunger, A.T. Free R value: cross-validation in crystallography. *Methods Enzymol* **277**, 366-96 (1997).
21. Chen, V.B. et al. MolProbity: all-atom structure validation for macromolecular crystallography. *Acta Crystallogr D Biol Crystallogr* **66**, 12-21 (2010).
